# Supplementary material for: Mutational Biases Drive Elevated Rates of Substitution at Regulatory Sites across Cancer Types
Source: PubMed Central journal article supplement (PMC4973979; doi:10.1371/journal.pgen.1006207), 2016-08-04

**Functional, Somatic**

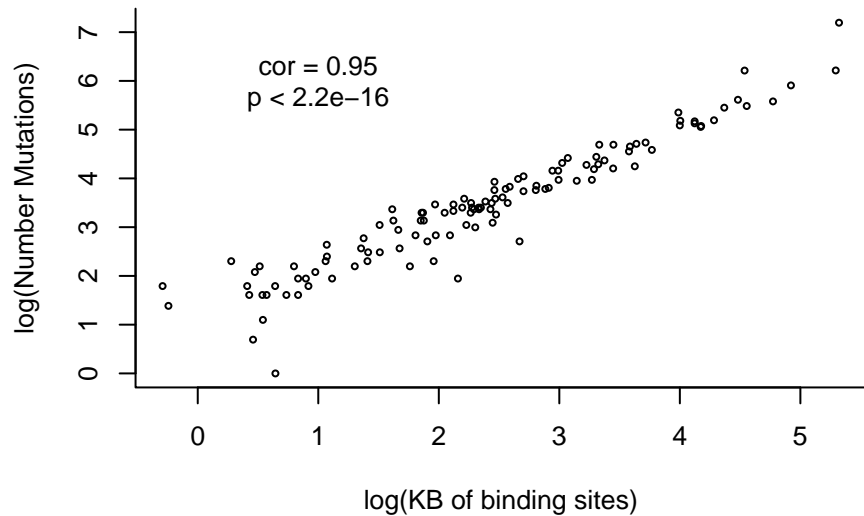

**Control, Somatic**

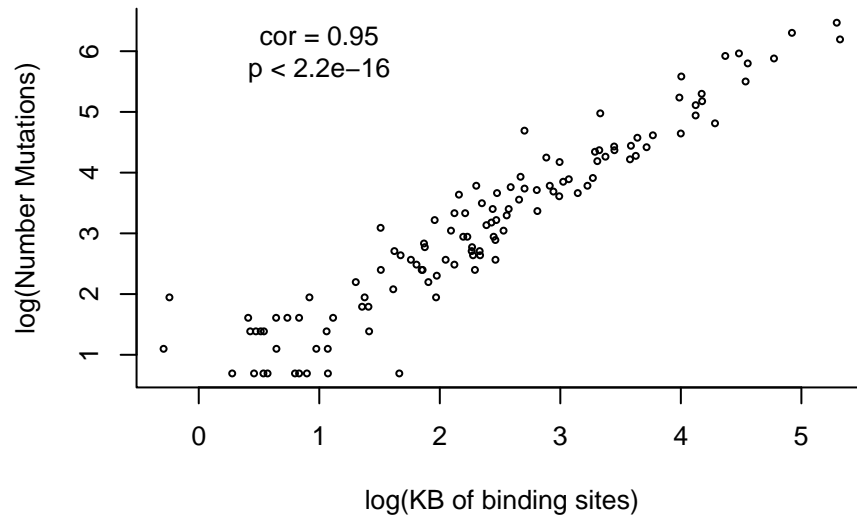

**Functional, 1KG**

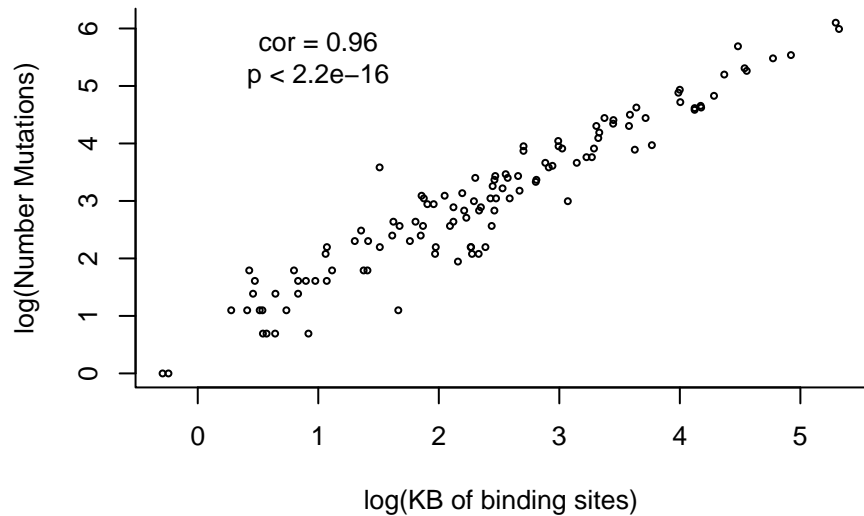

**Control, 1KG**

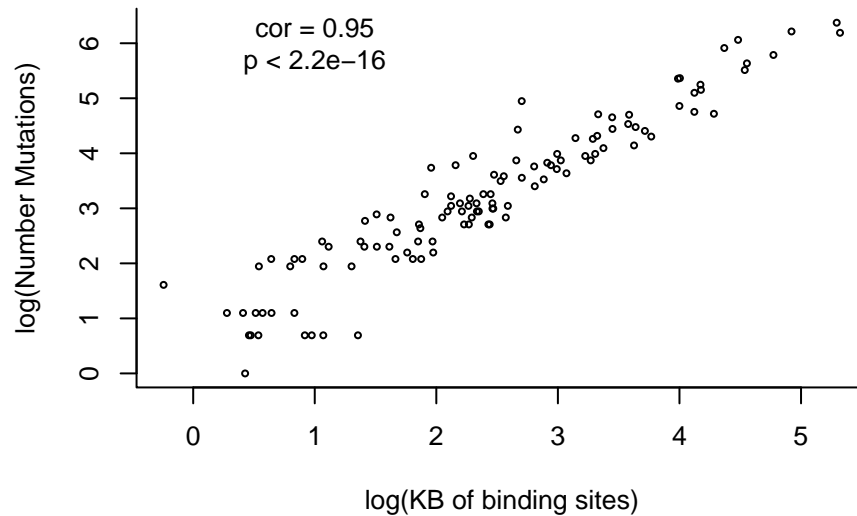

Supplement: pgen.1006207.s001.pdf [file pgen.1006207.s001.pdf]
