# Supplementary material for: Mutational Biases Drive Elevated Rates of Substitution at Regulatory Sites across Cancer Types
Source: PubMed Central journal article supplement (PMC4973979; doi:10.1371/journal.pgen.1006207), 2016-08-04

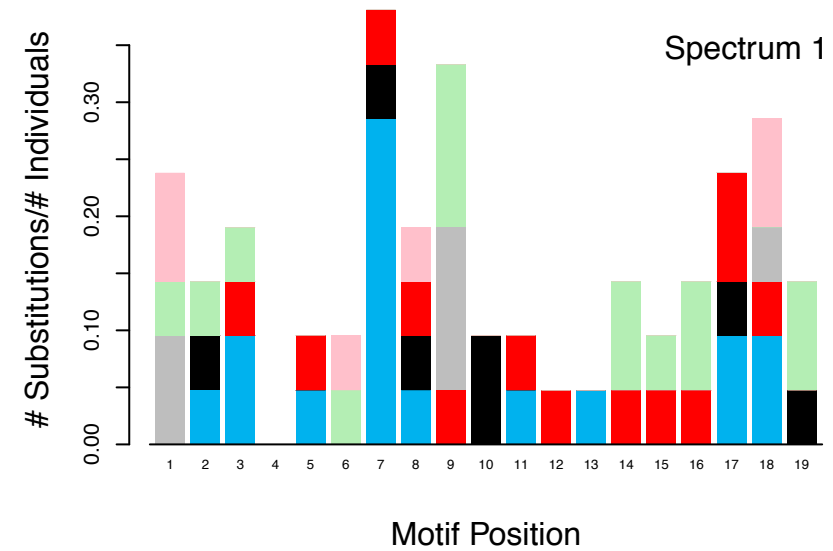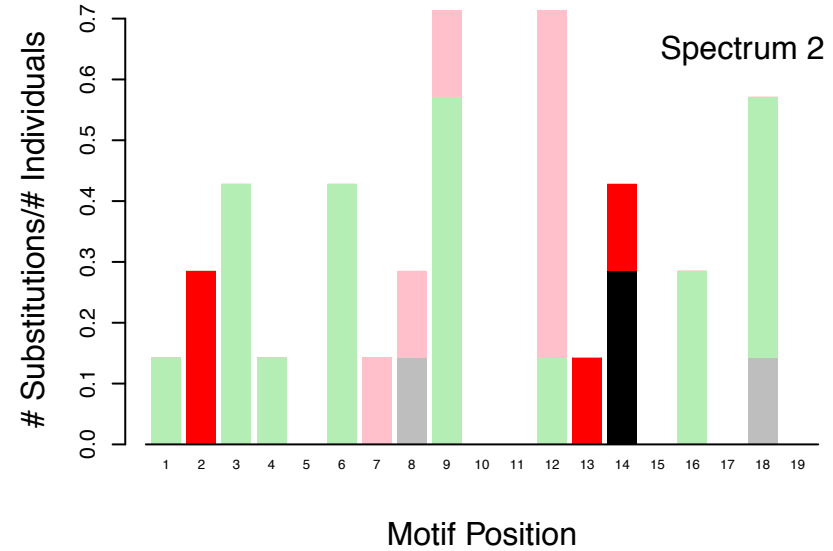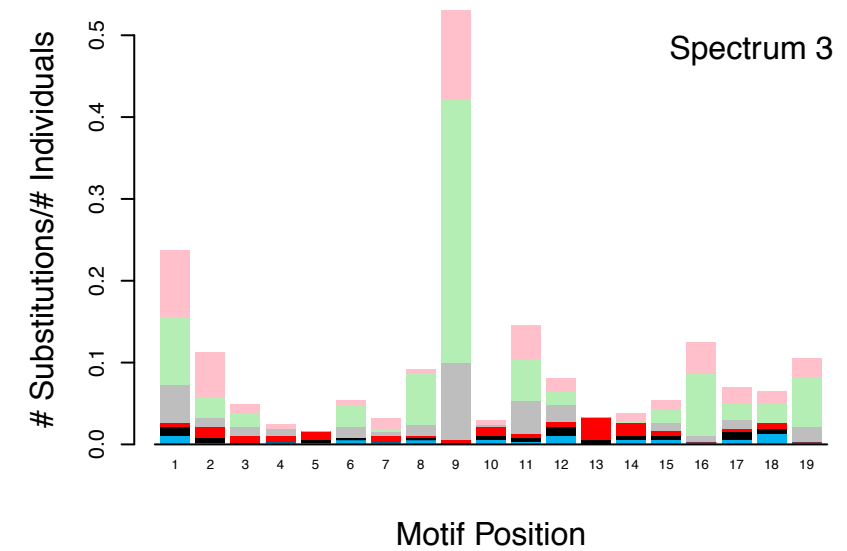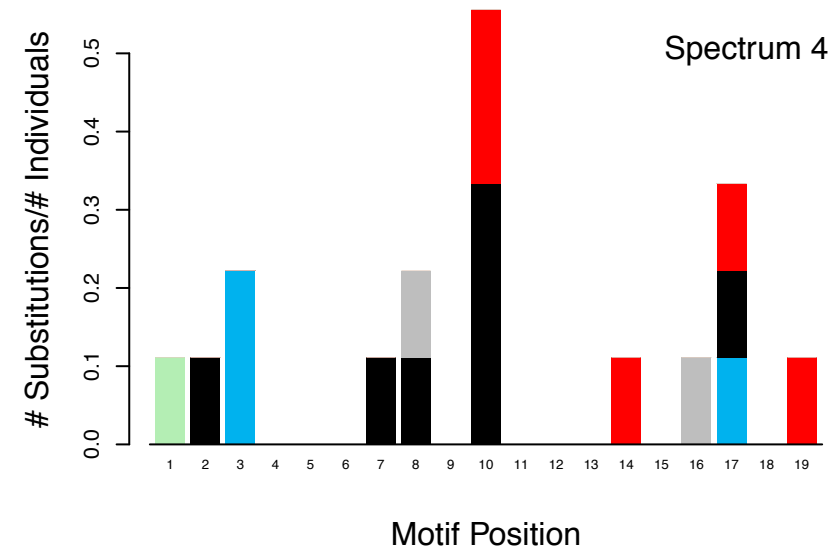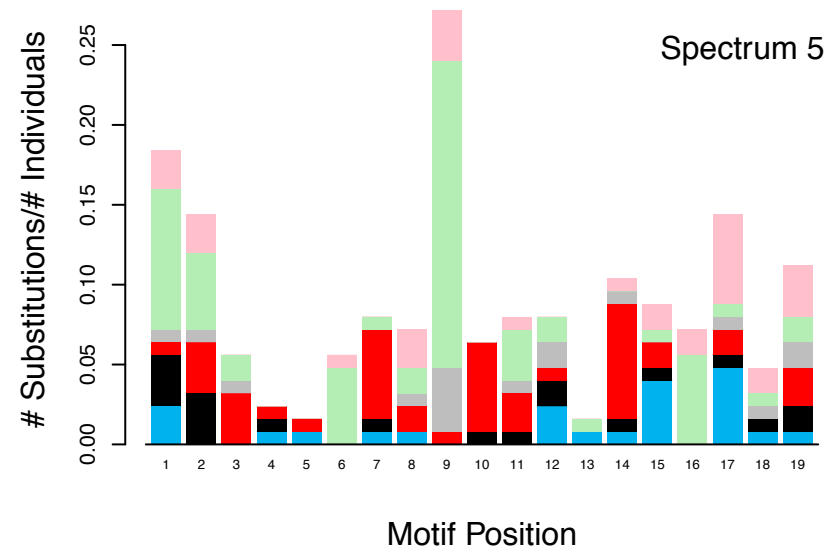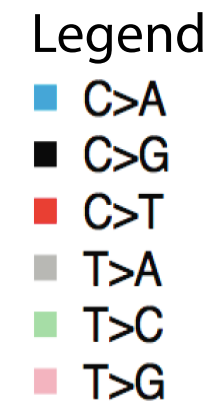

Supplement: pgen.1006207.s004.pdf [file pgen.1006207.s004.pdf]
