# Supplementary material for: Mutational Biases Drive Elevated Rates of Substitution at Regulatory Sites across Cancer Types
Source: PubMed Central journal article supplement (PMC4973979; doi:10.1371/journal.pgen.1006207), 2016-08-04
Supplement: pgen.1006207.s008.pdf [file pgen.1006207.s008.pdf]

Legend

- C>A
- C>G
- C>T
- T>A
- T>C
- T>G

TFAP2A, MA0003.2

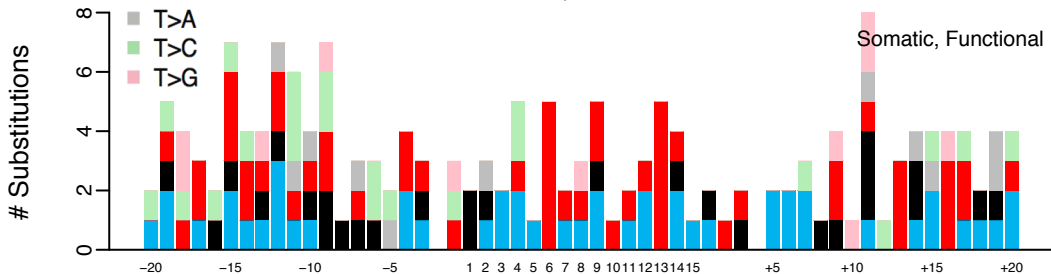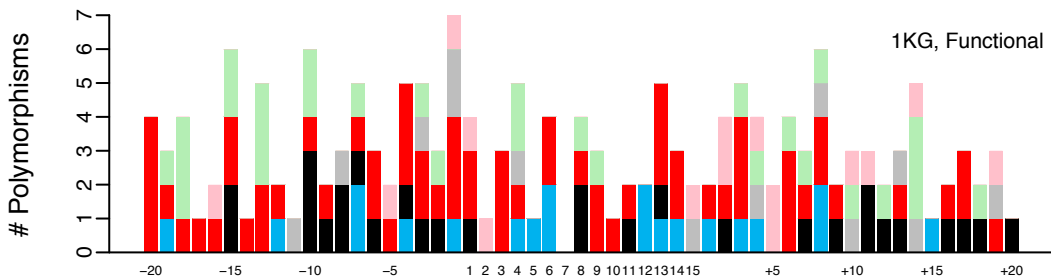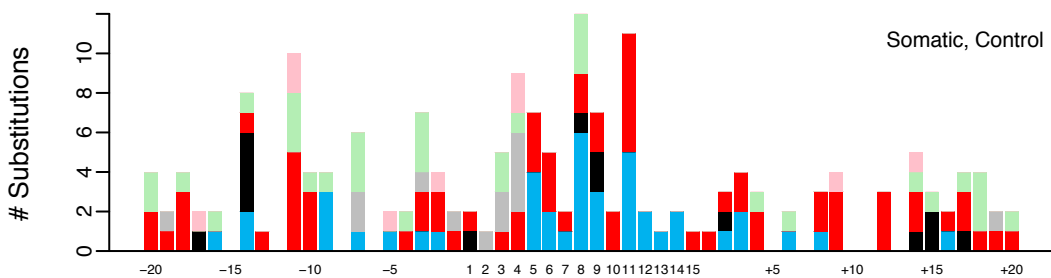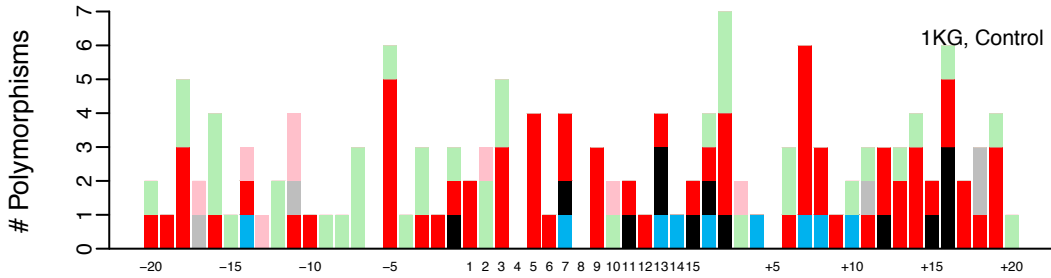

MOTIF POSITION

# MEF2A, MA0005.2

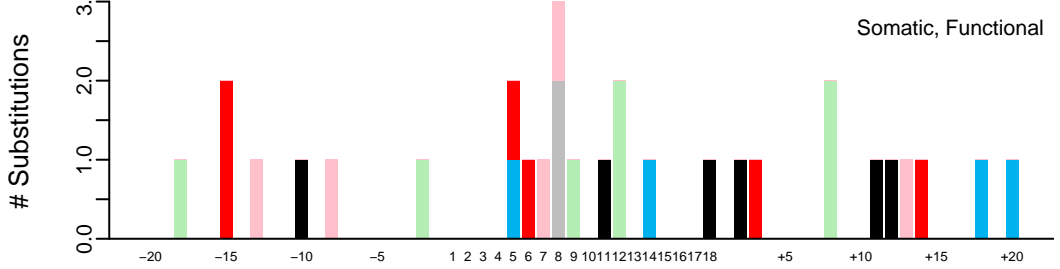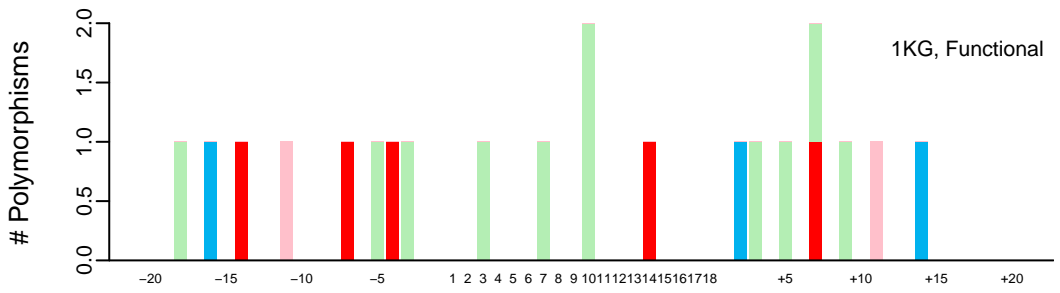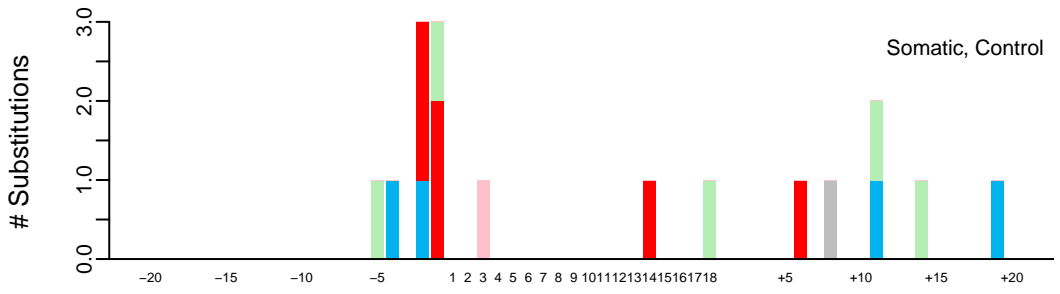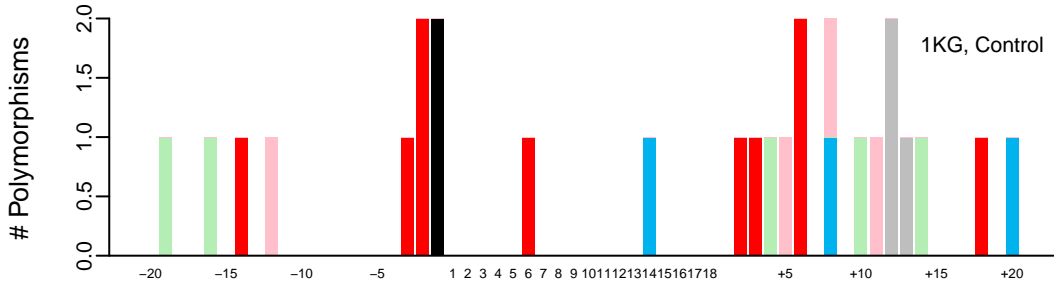

MOTIF POSITION

### AR, MA0007.2

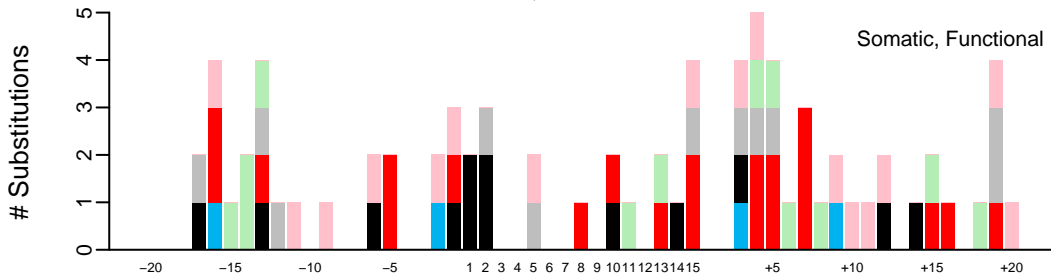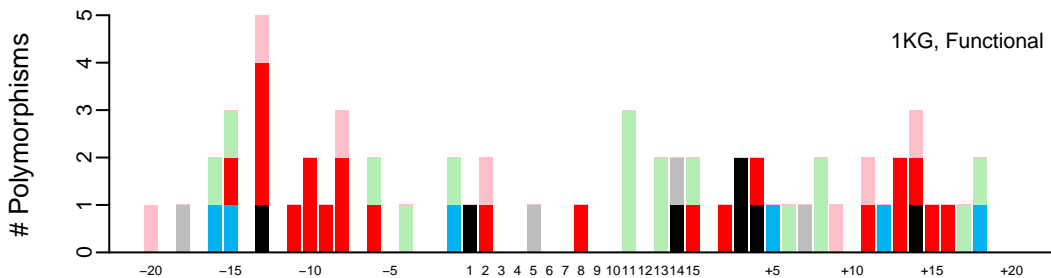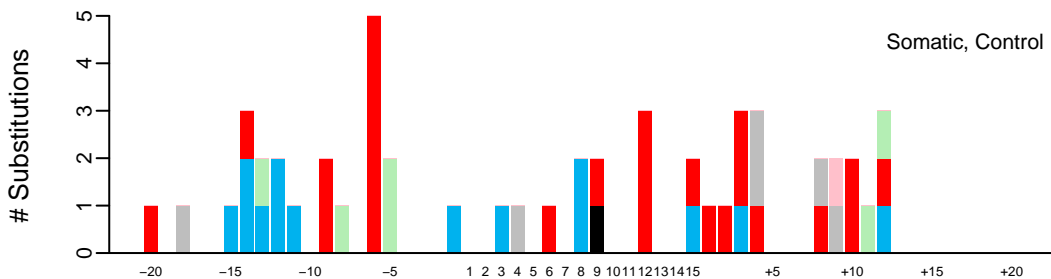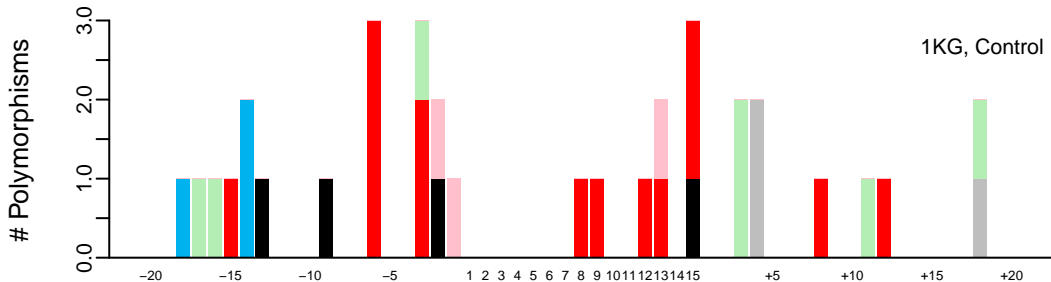

MOTIF POSITION

# PAX5, MA0014.2

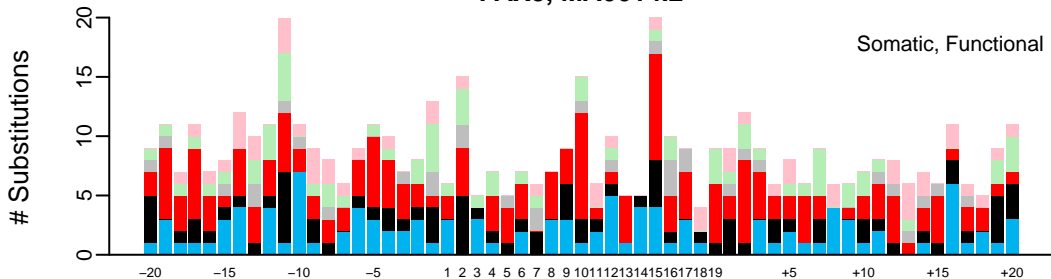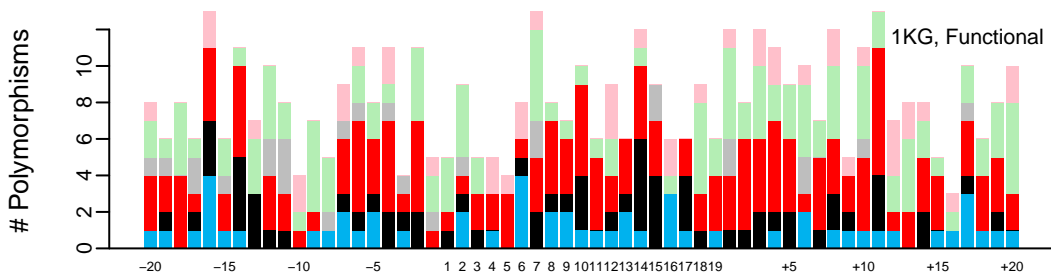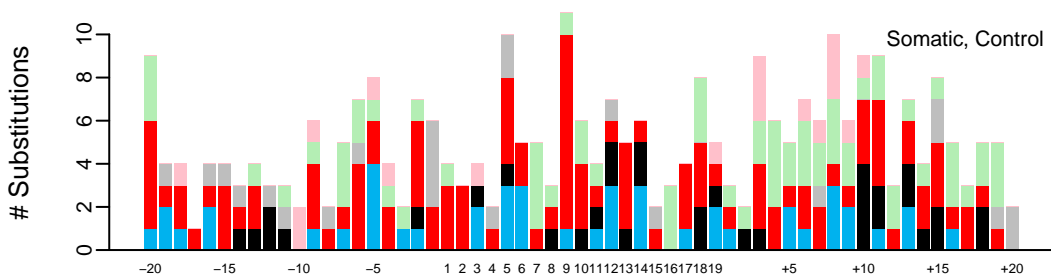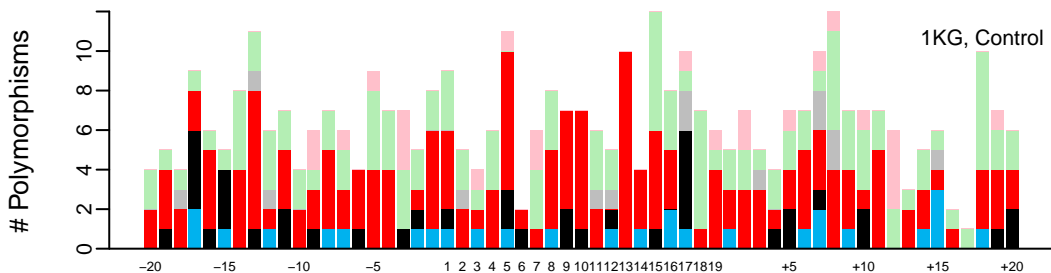

MOTIF POSITION

# E2F1, MA0024.2

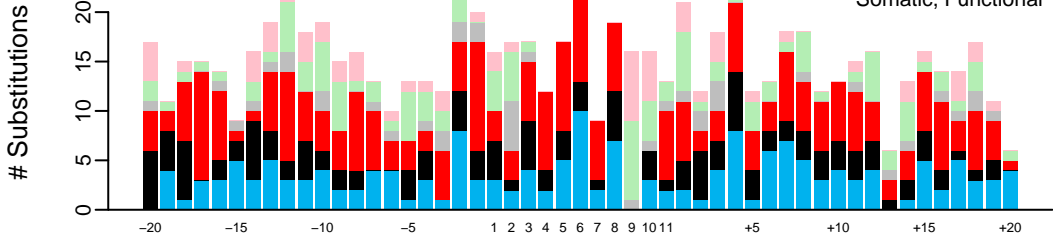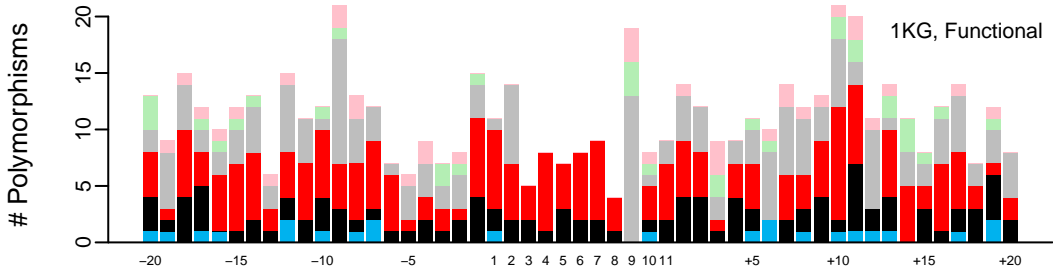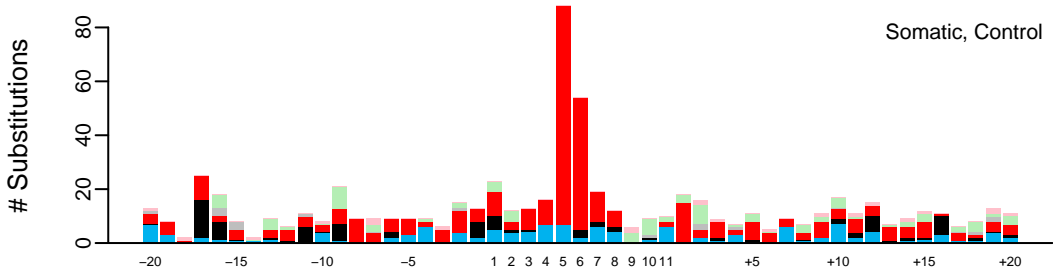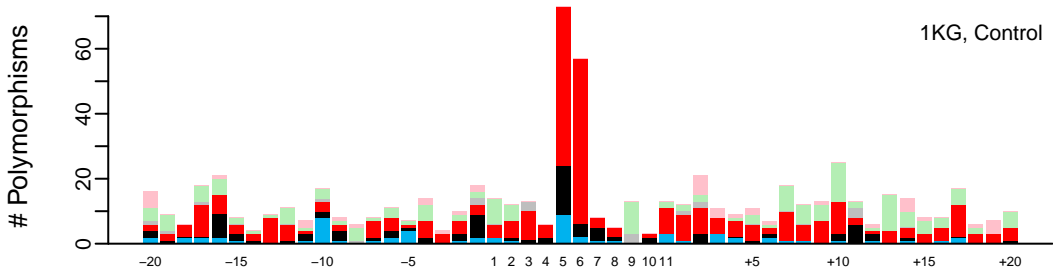

MOTIF POSITION

# GATA1, MA0035.3

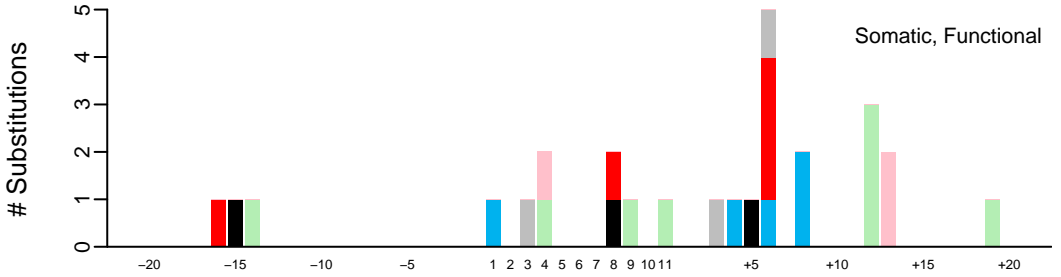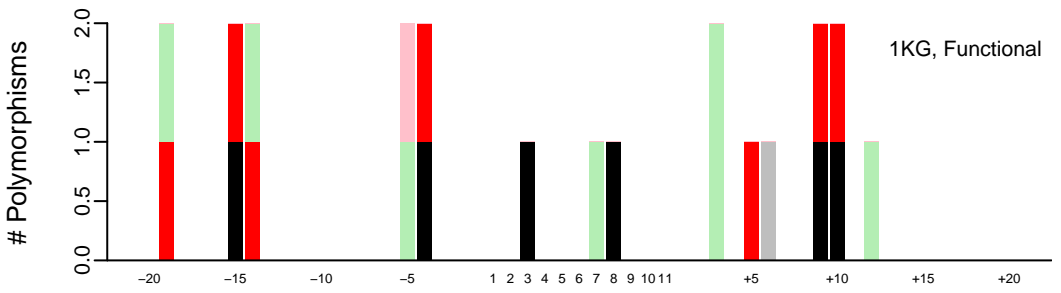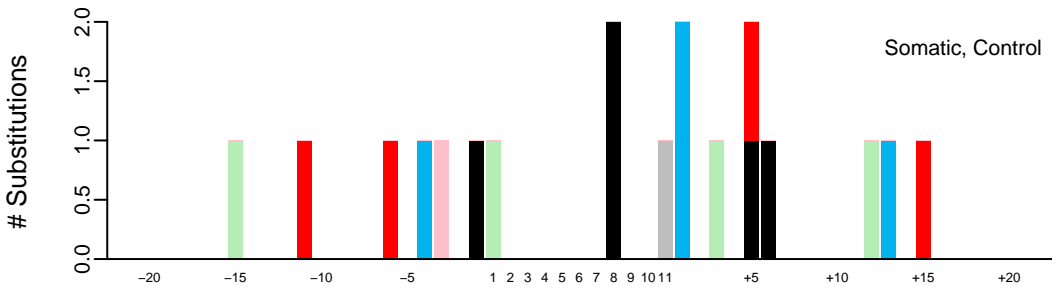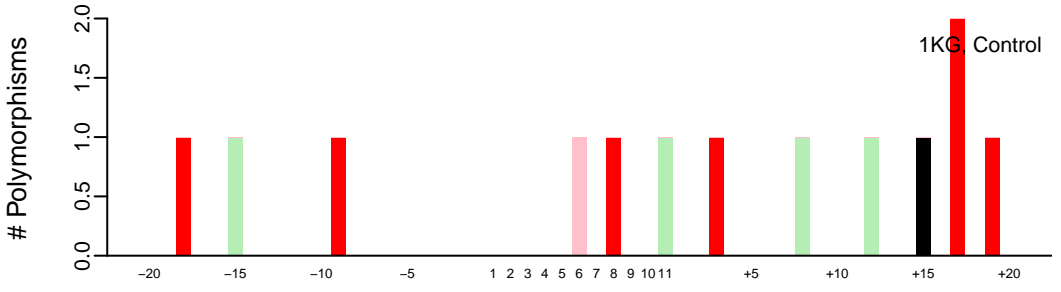

MOTIF POSITION

# GATA2, MA0036.2

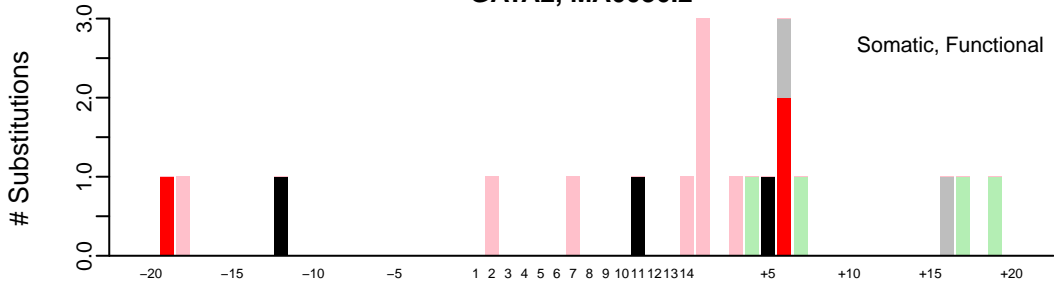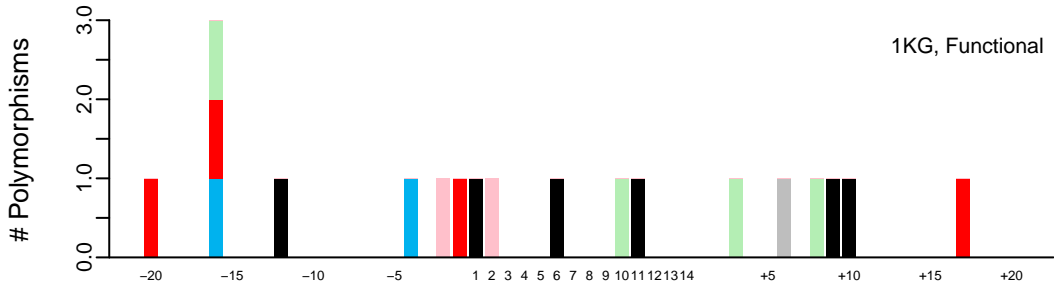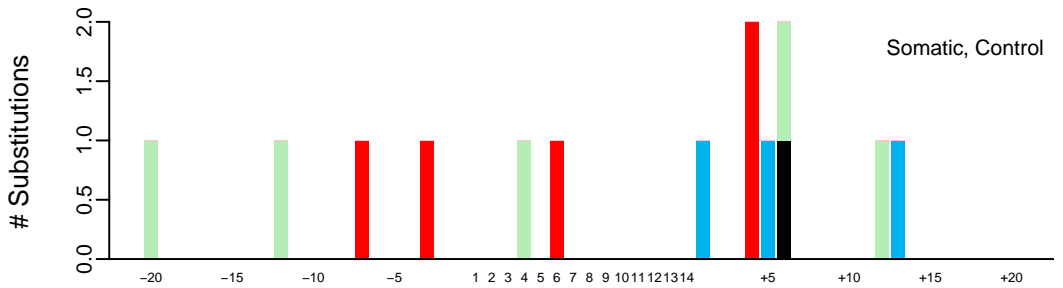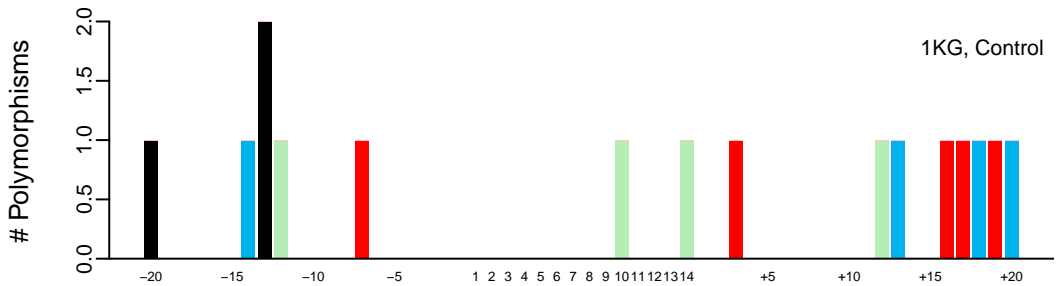

MOTIF POSITION

# GATA3, MA0037.2

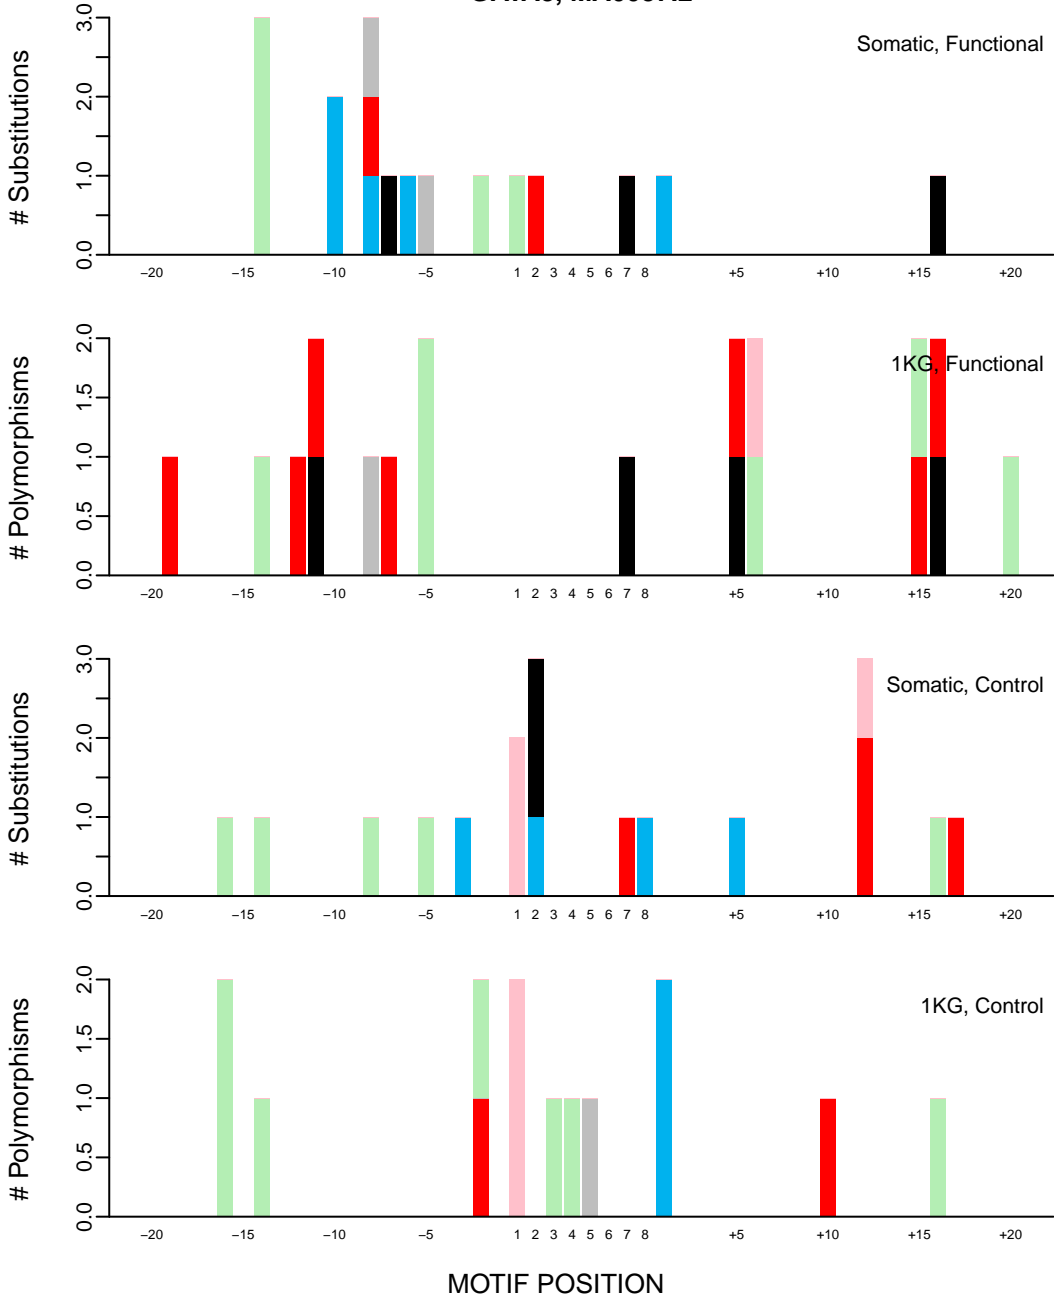



# FOXA2, MA0047.2

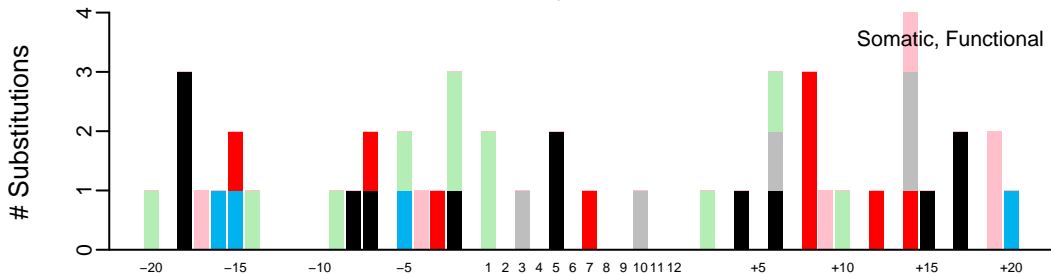

Somatic, Functional

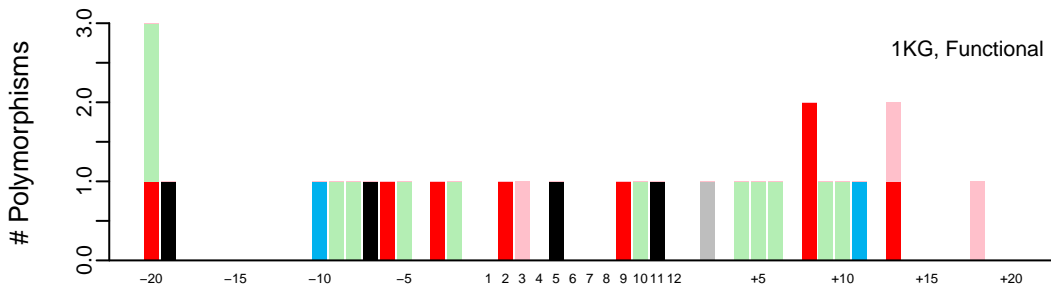

1KG, Functional

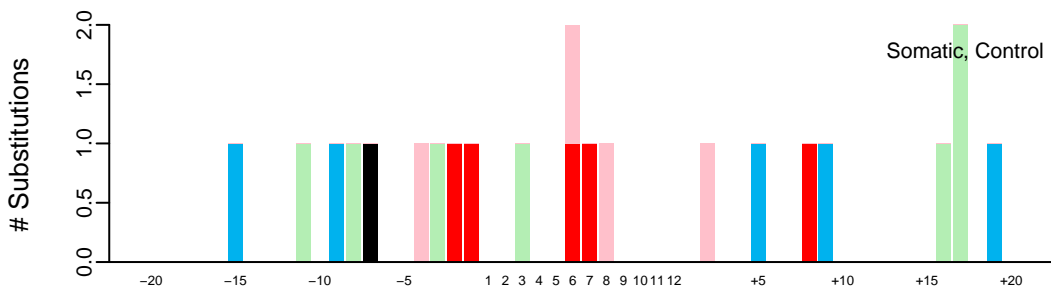

Somatic, Control

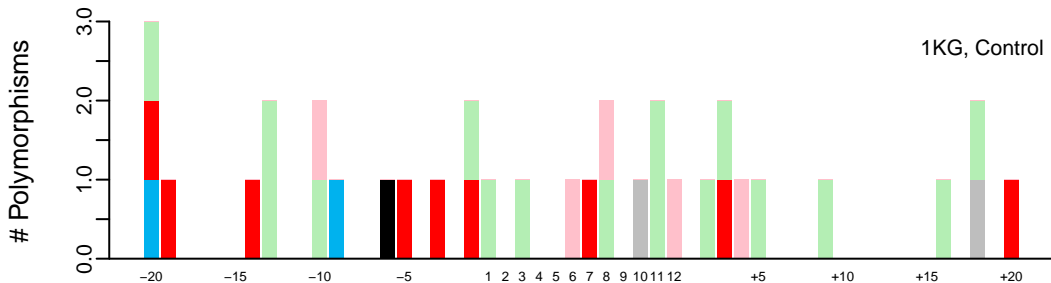

1KG, Control

MOTIF POSITION

# IRF1, MA0050.2

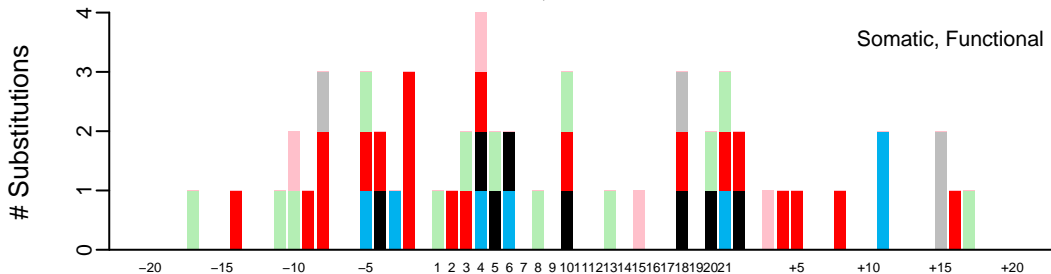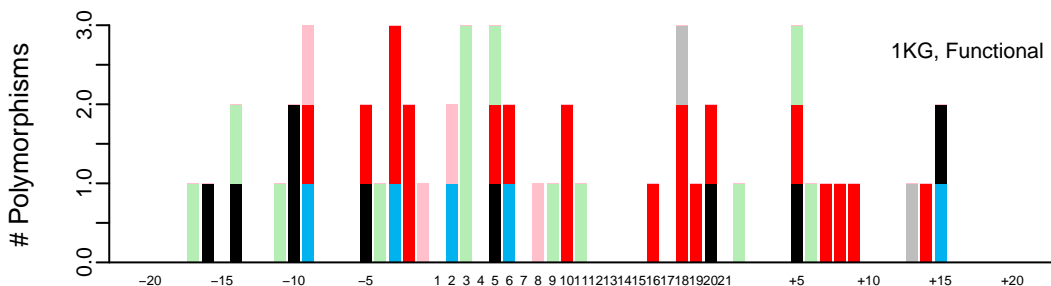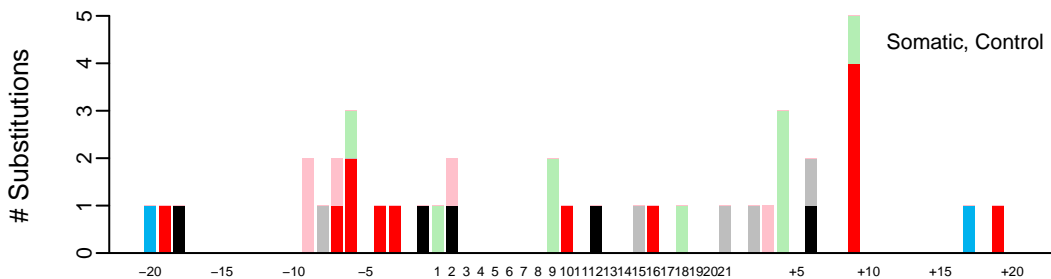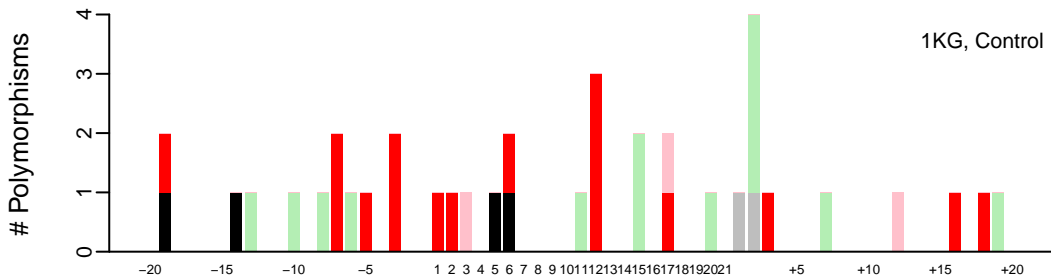

MOTIF POSITION

# MEF2A, MA0052.2

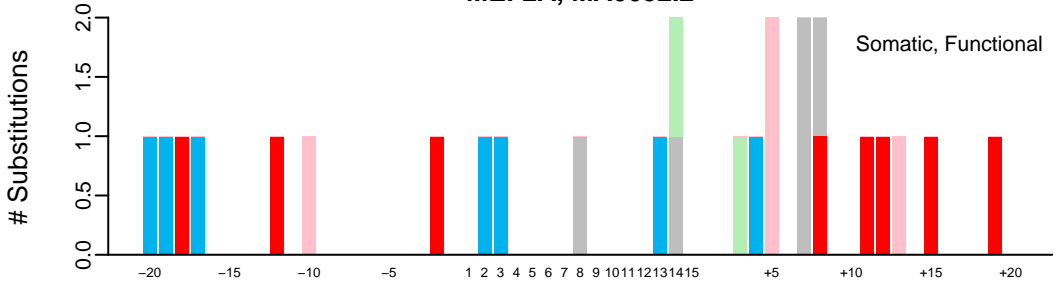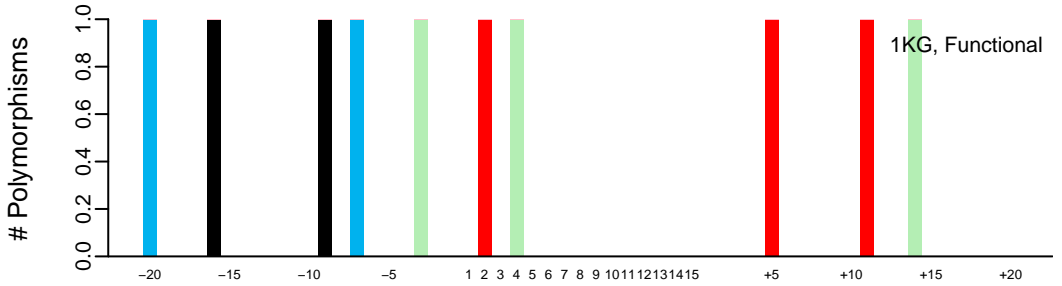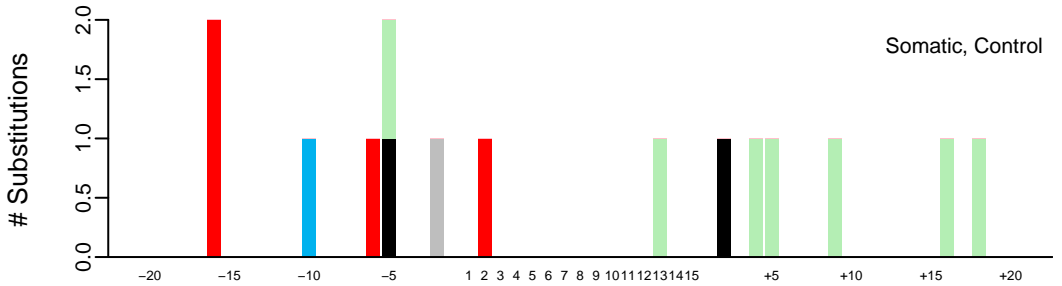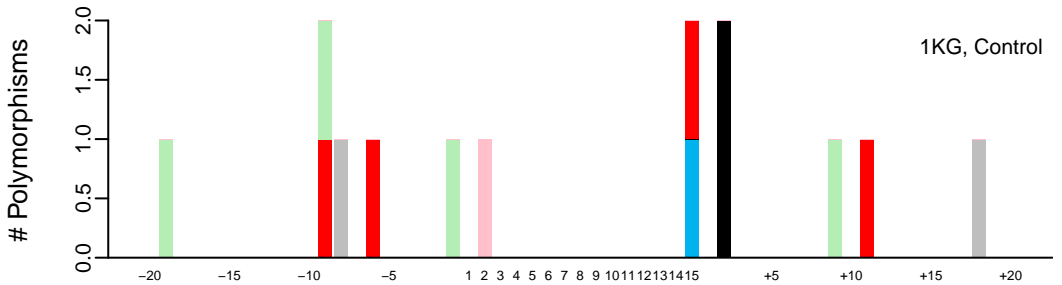

MOTIF POSITION

# MAX, MA0058.2

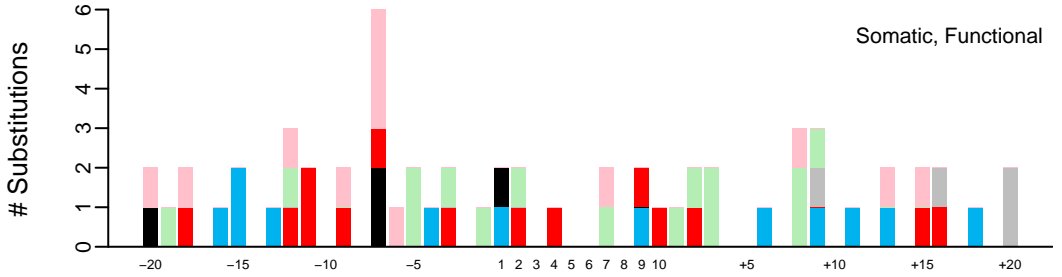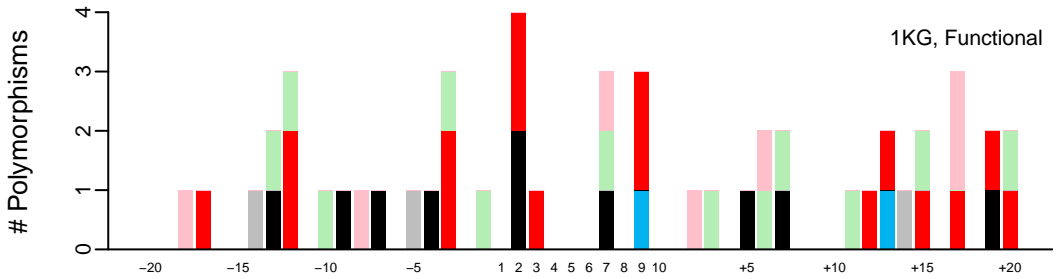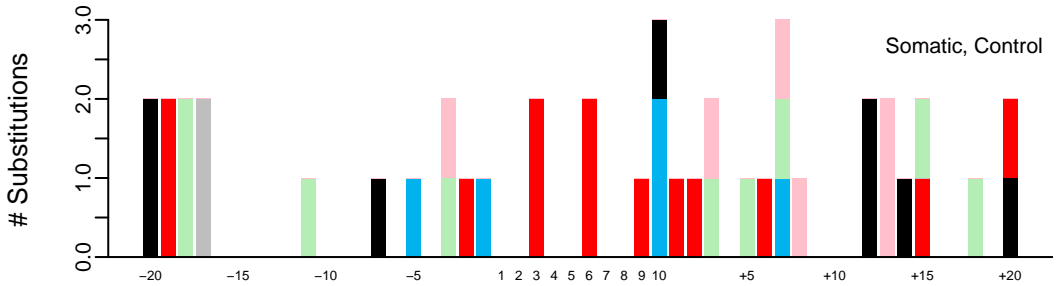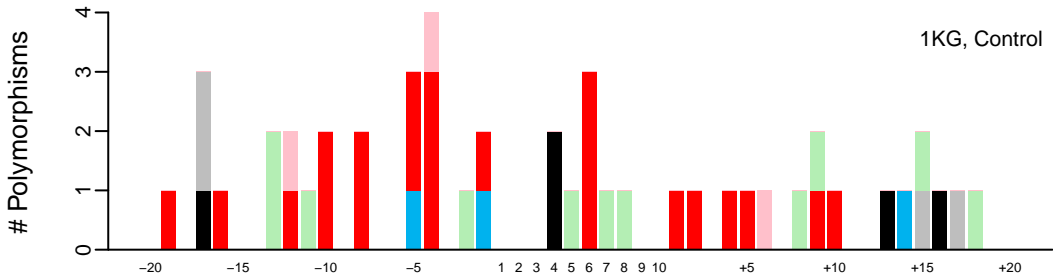

MOTIF POSITION

# NFYA, MA0060.2

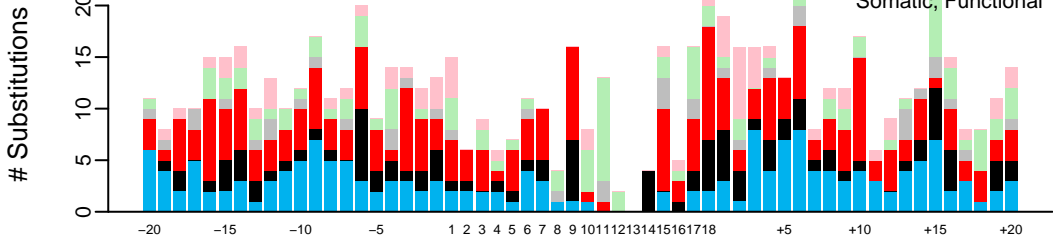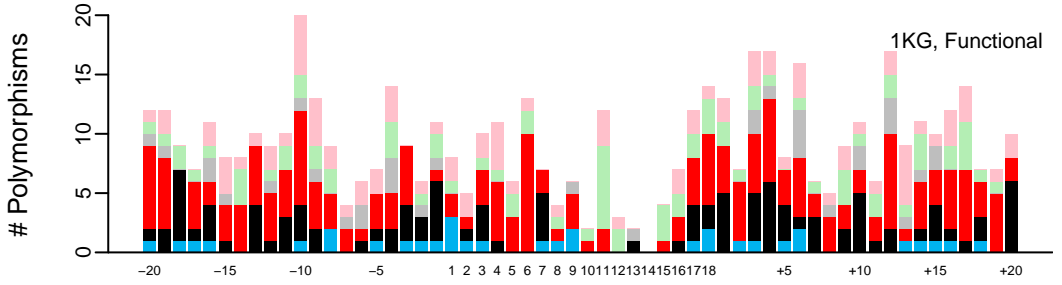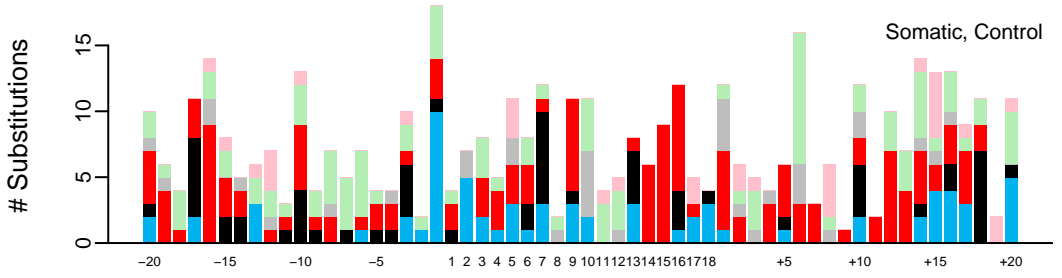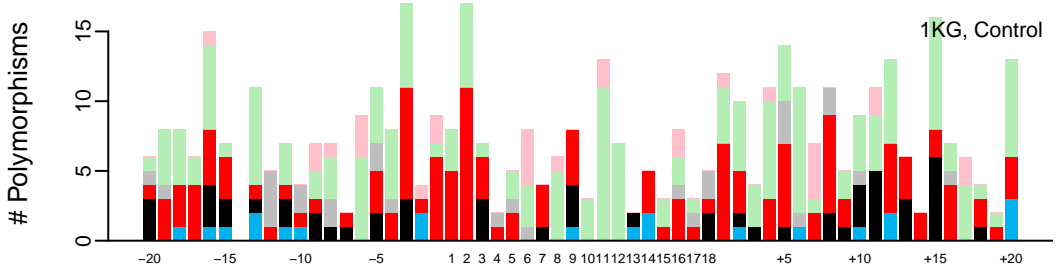

MOTIF POSITION

# GABP, MA0062.2

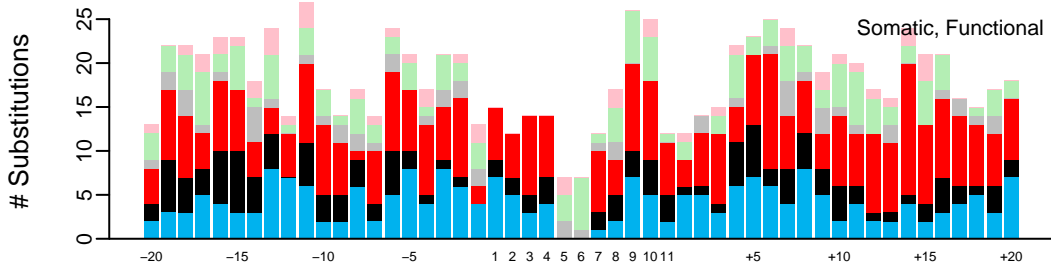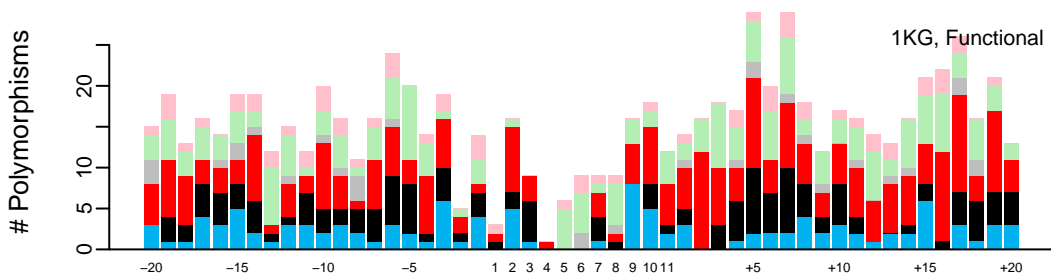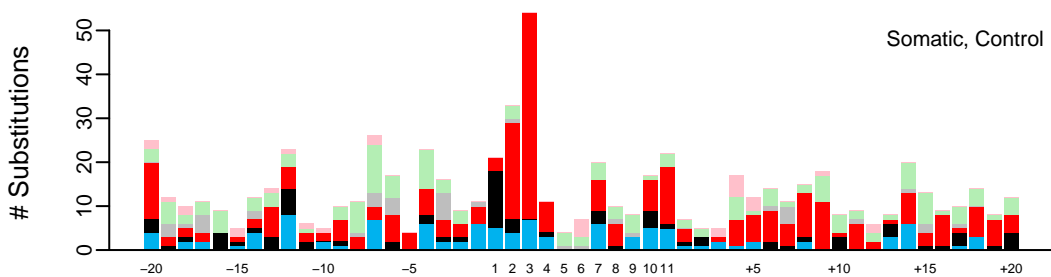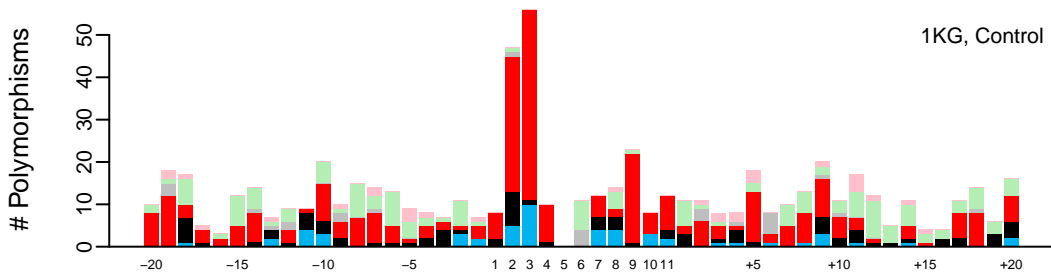

MOTIF POSITION

# ELK4, MA0076.2

# Substitutions

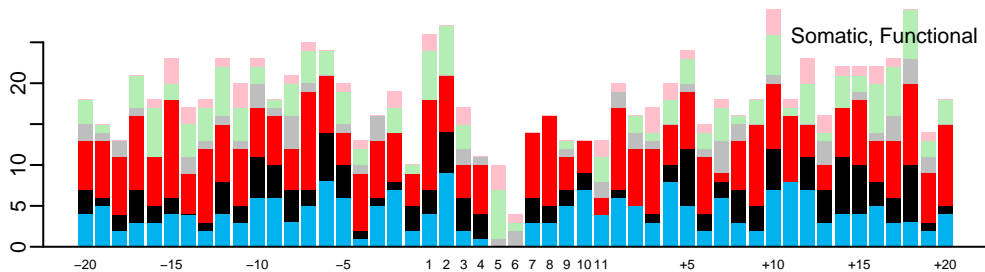

# Polymorphisms

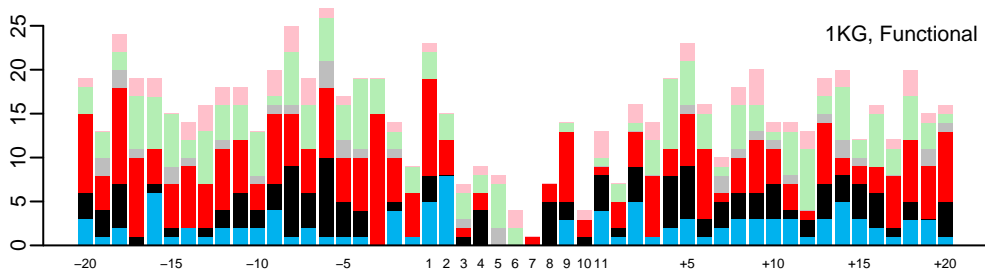

# Substitutions

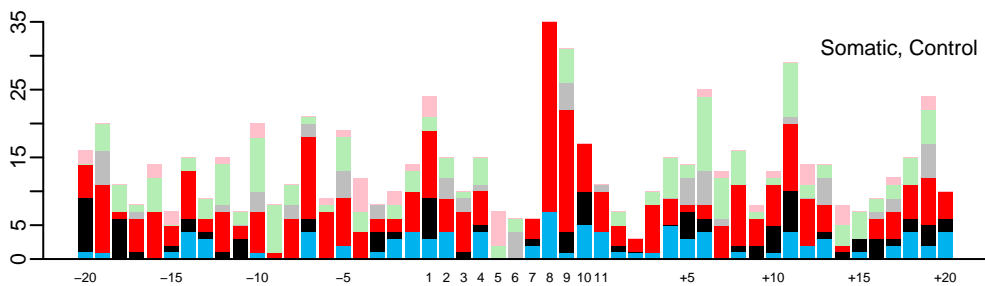

# Polymorphisms

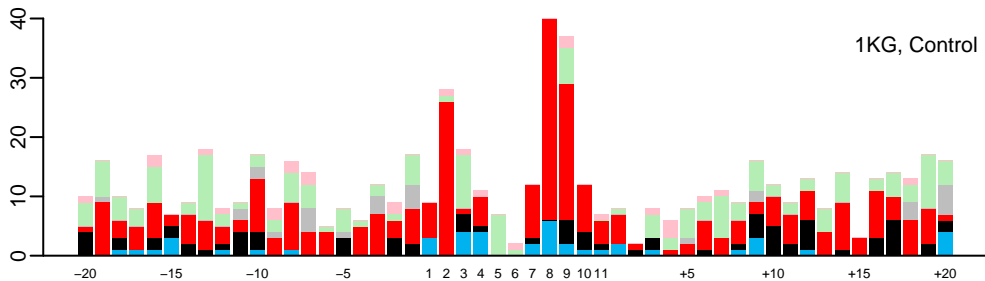

MOTIF POSITION

# SP1, MA0079.3

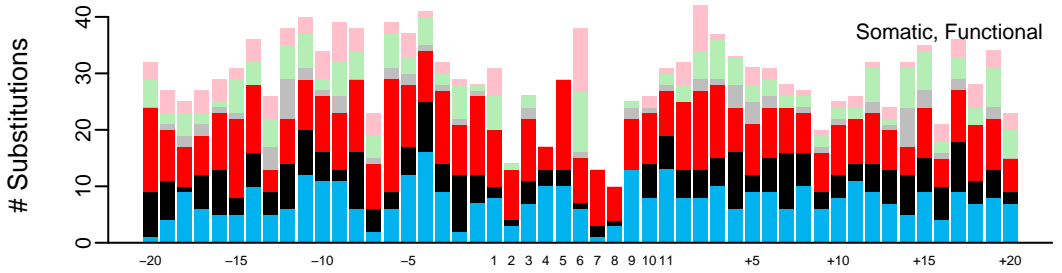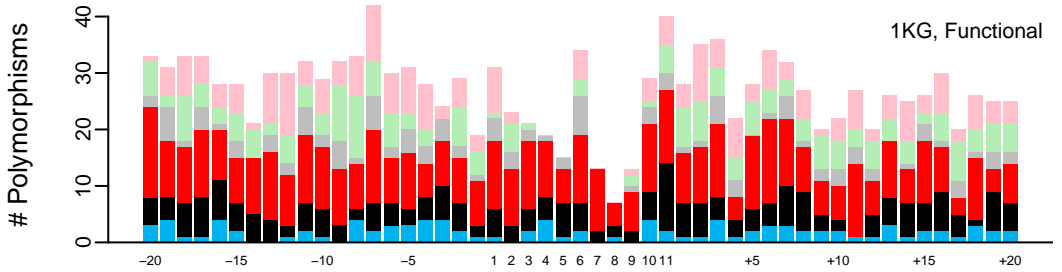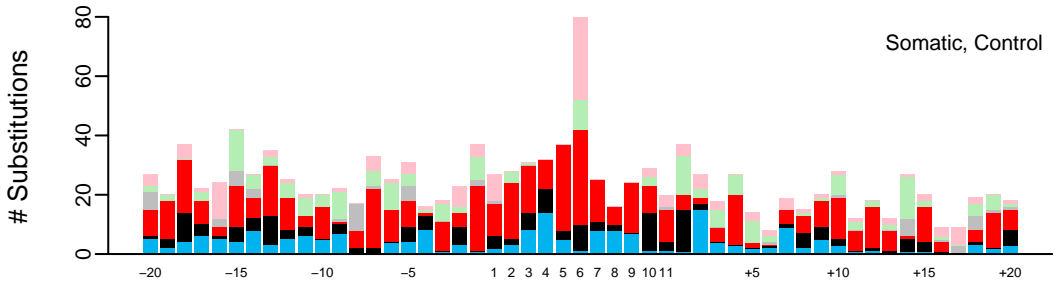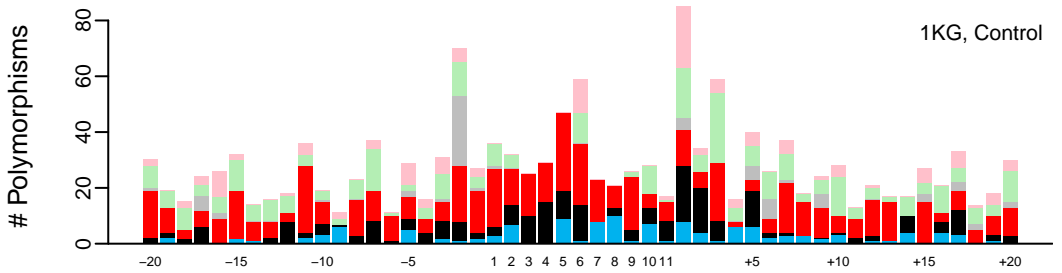



### PU1, MA0080.3

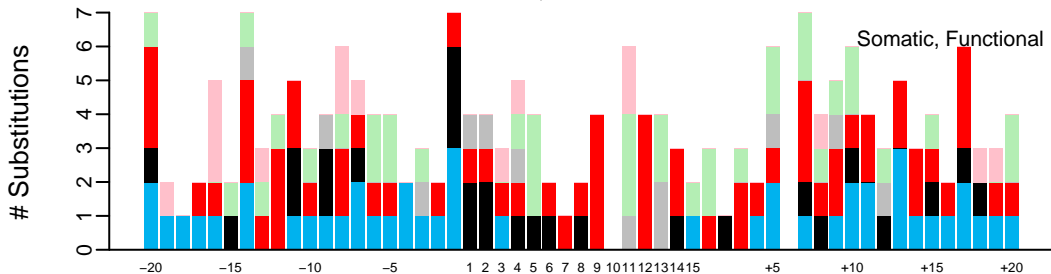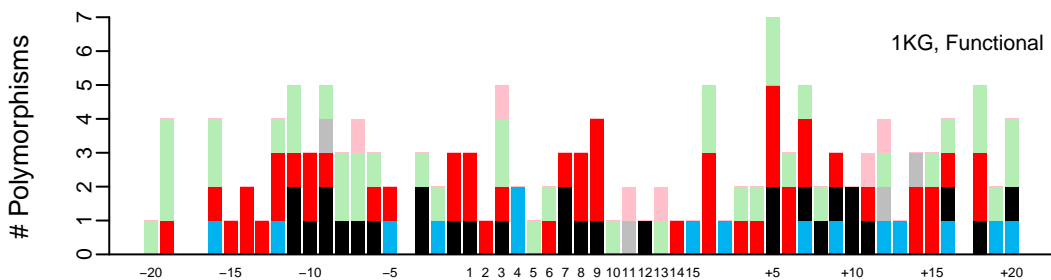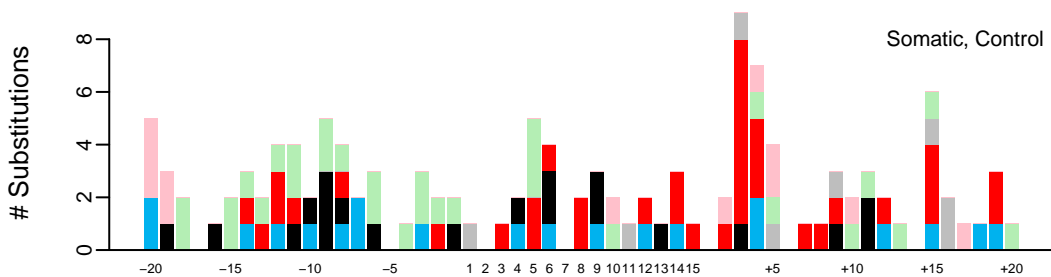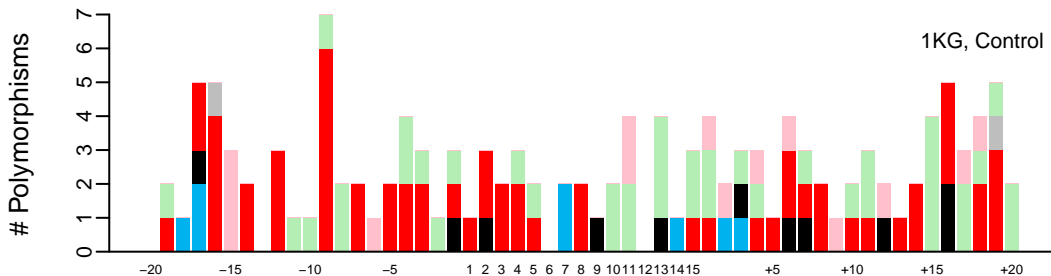

MOTIF POSITION

# SRF, MA0083.2

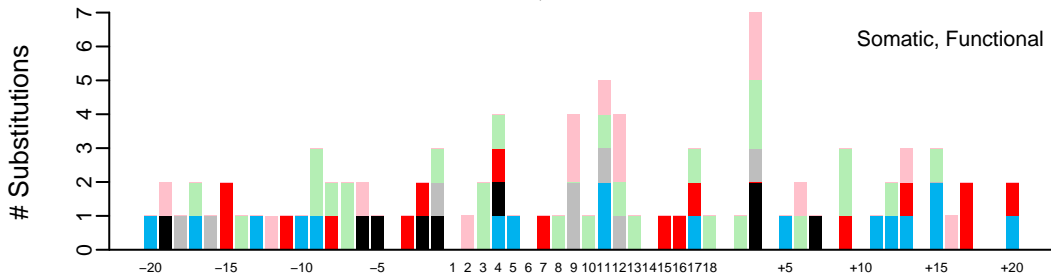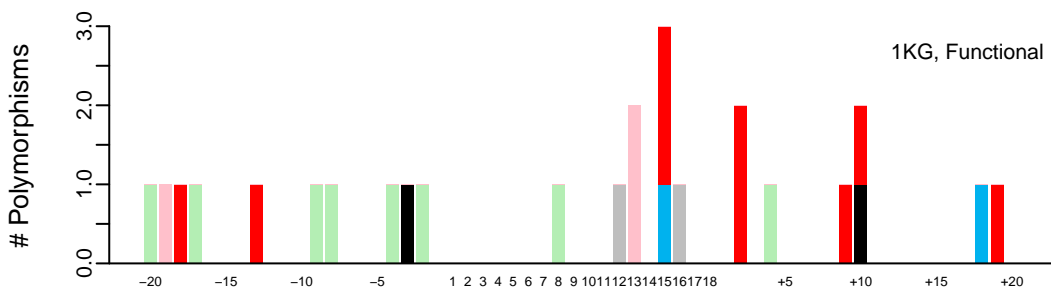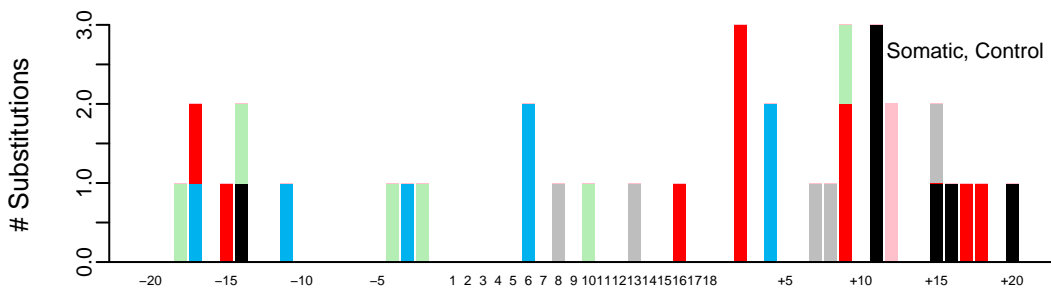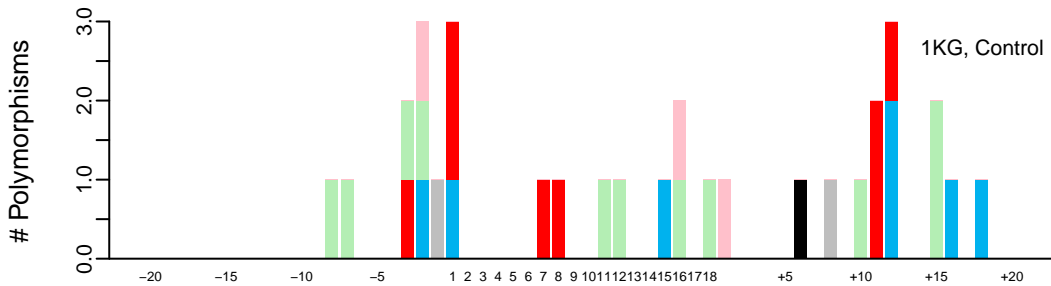

MOTIF POSITION

# USF1, MA0093.2

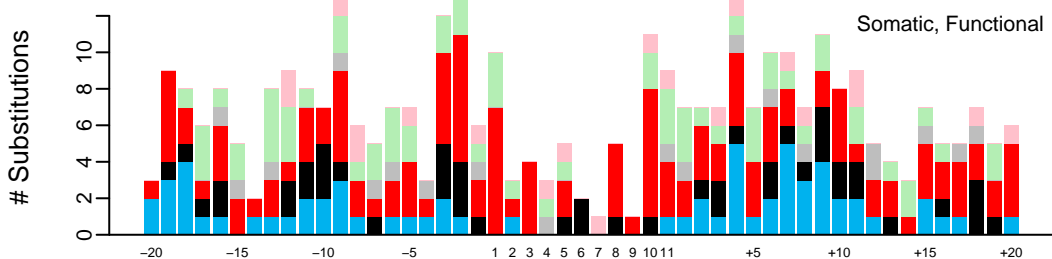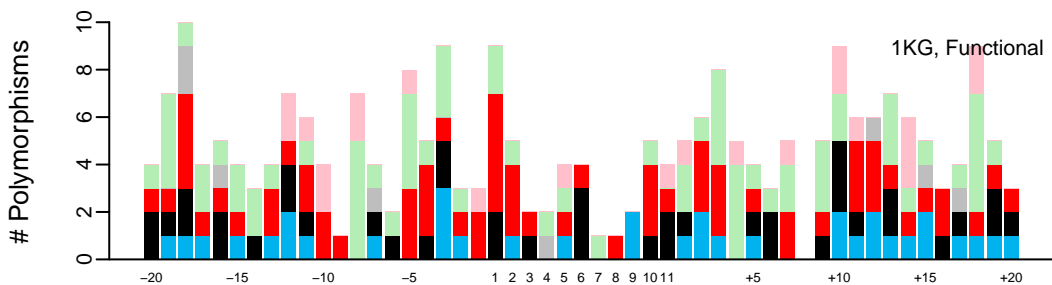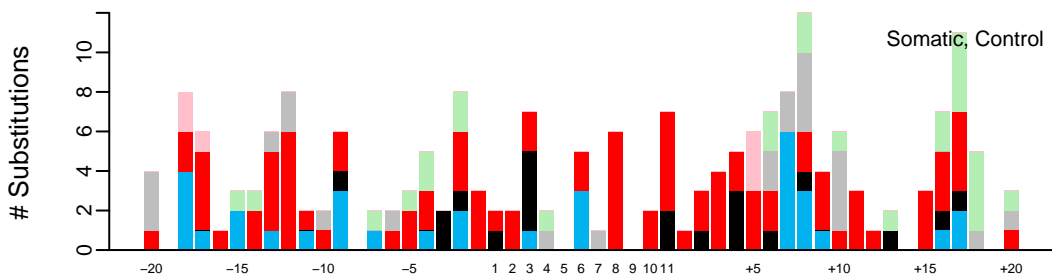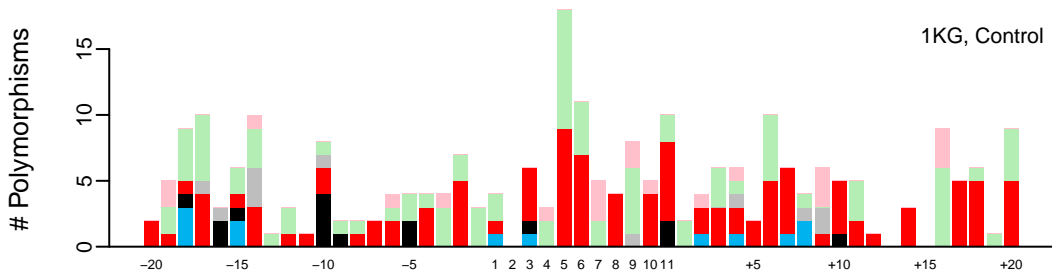

MOTIF POSITION

# YY1, MA0095.2

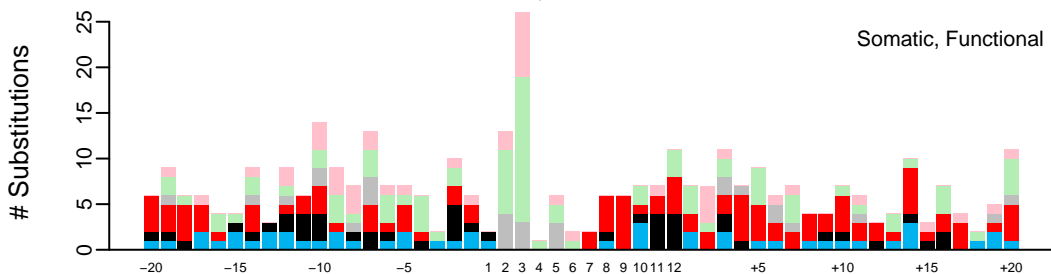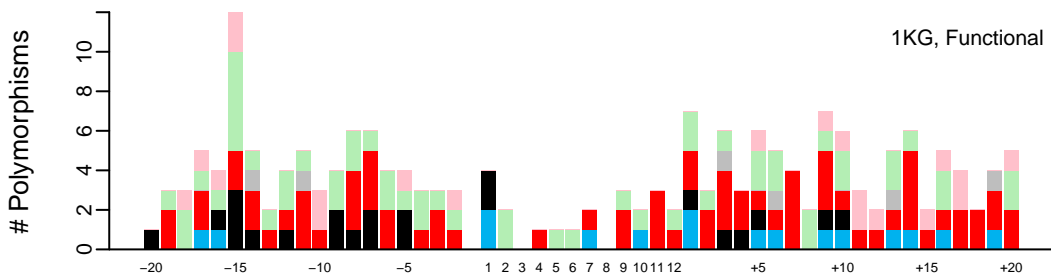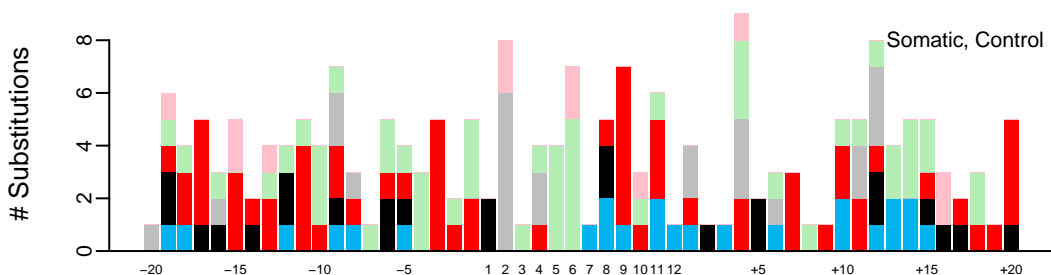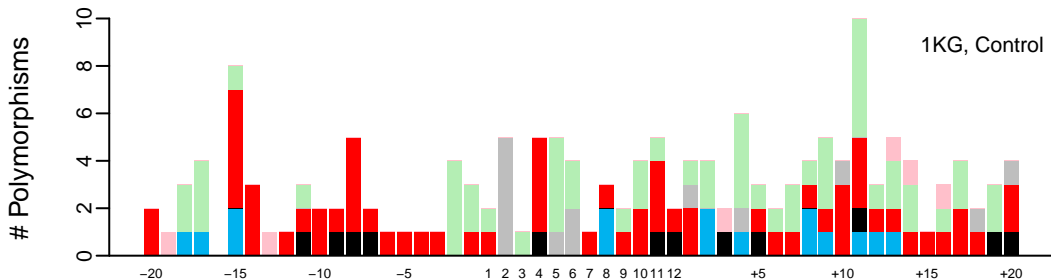

MOTIF POSITION

# ETS1, MA0098.2

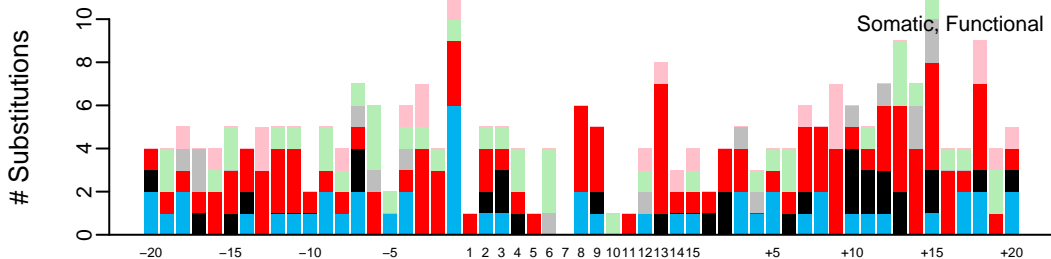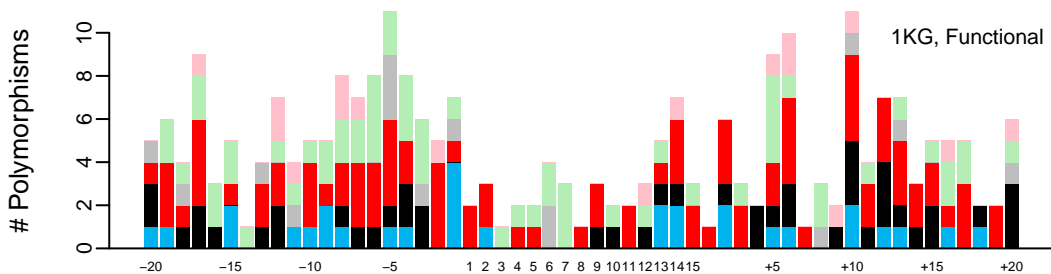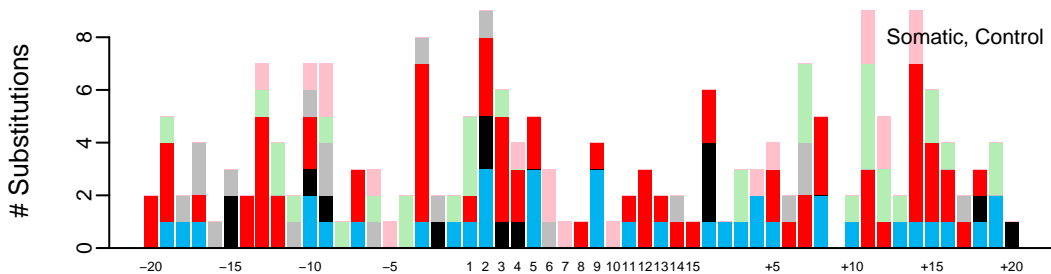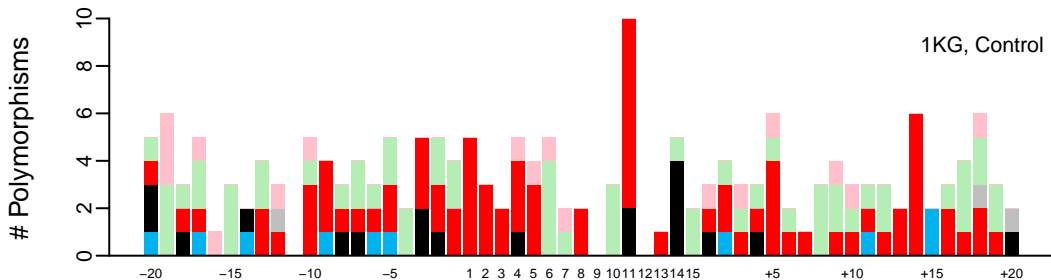

MOTIF POSITION

# CEBPA, MA0102.3

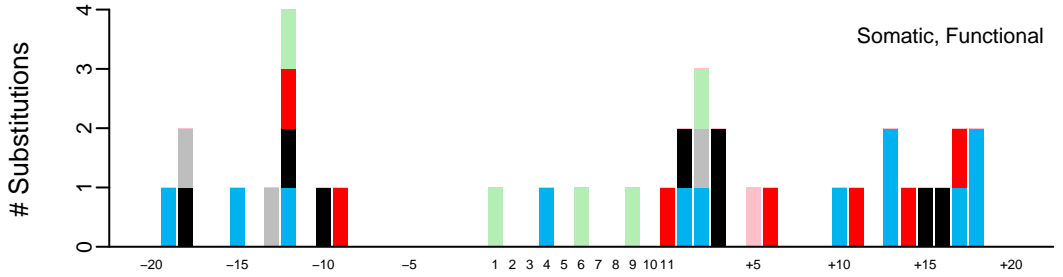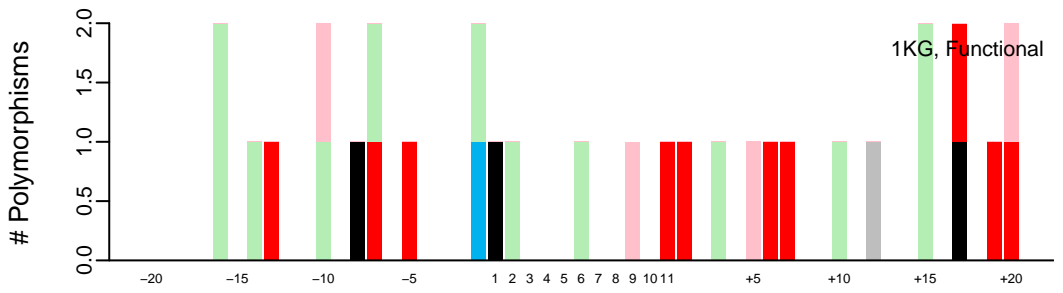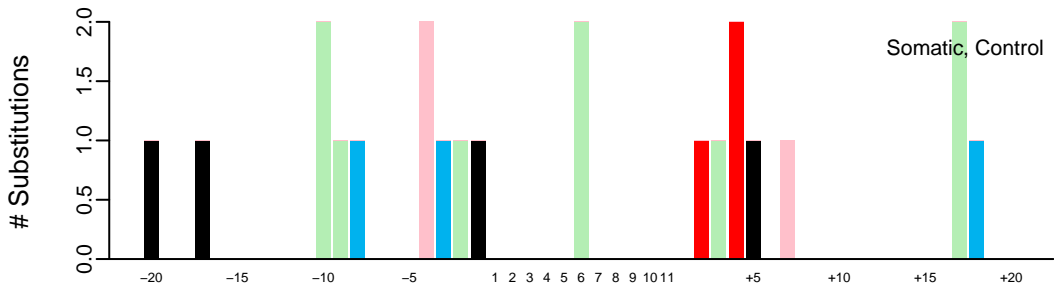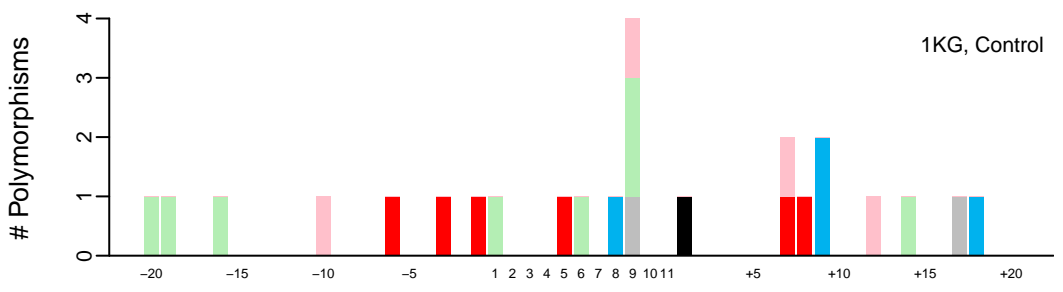

MOTIF POSITION

# ZEB1, MA0103.2

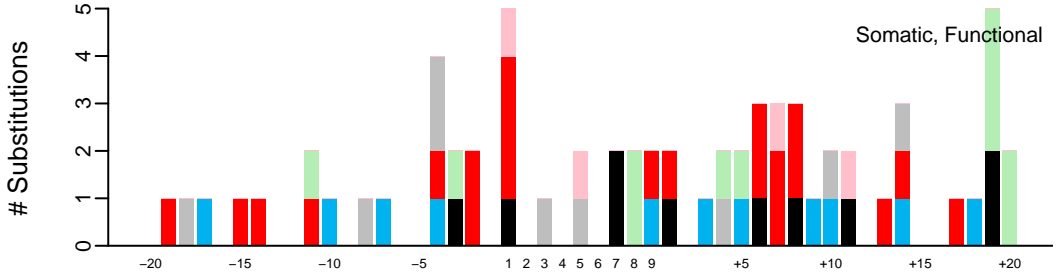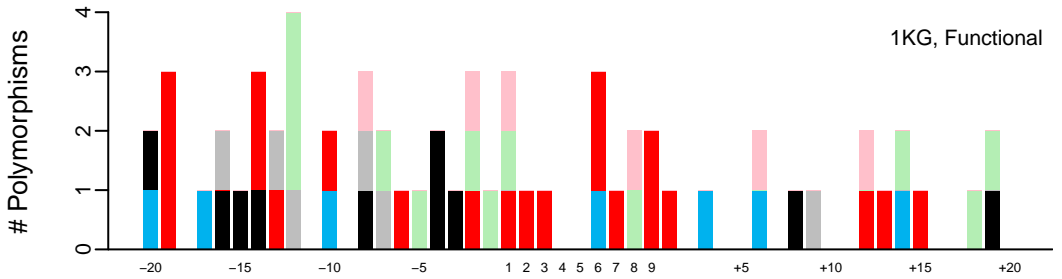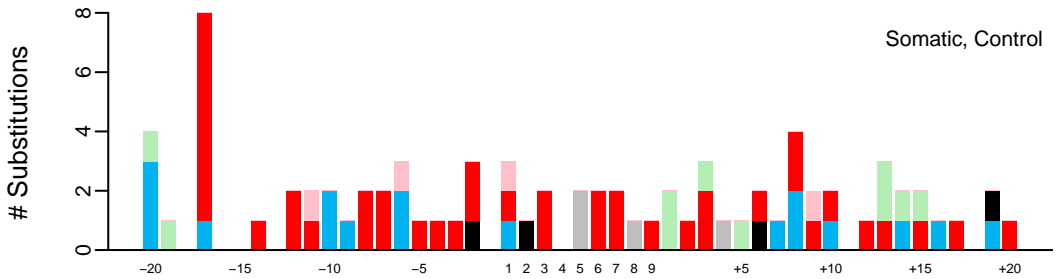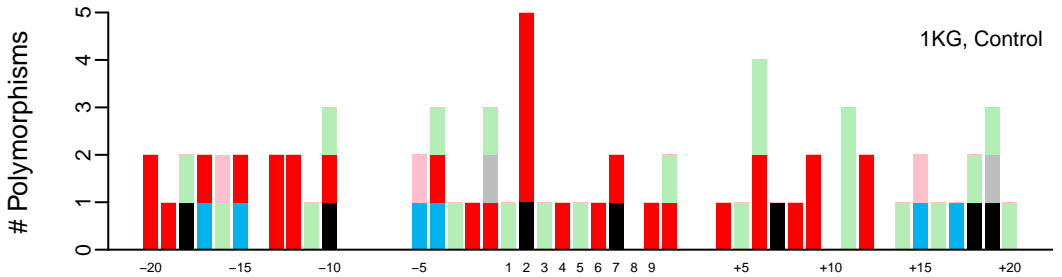

MOTIF POSITION

# NFKB, MA0105.3

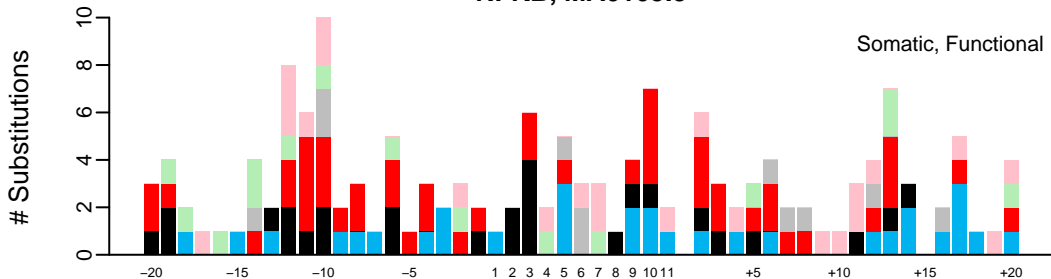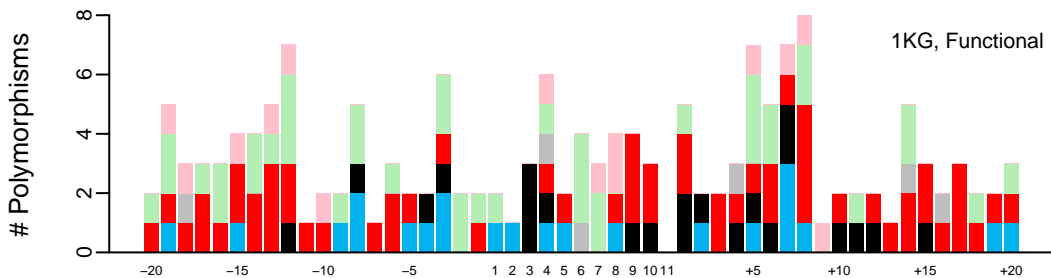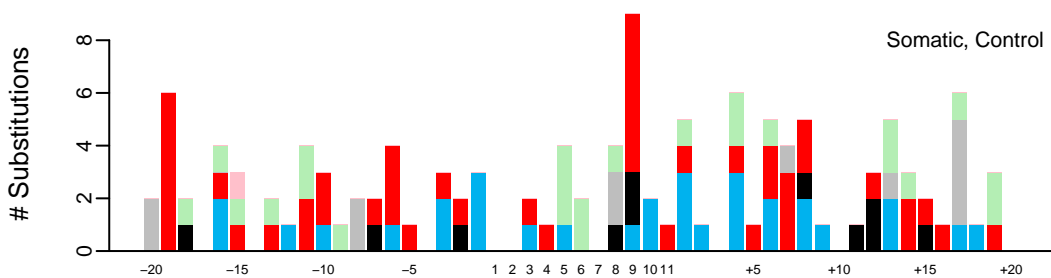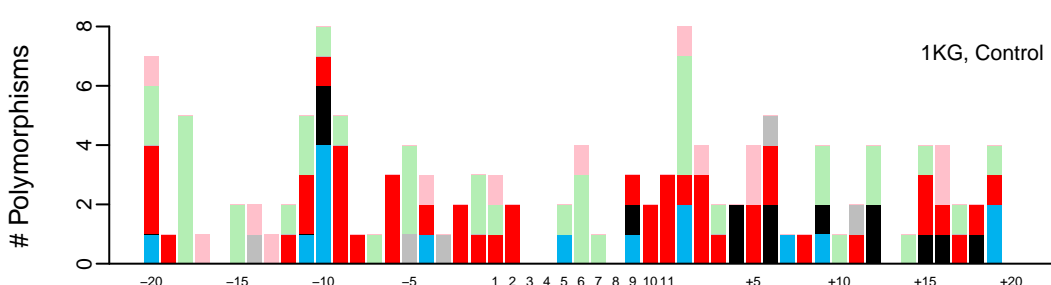

MOTIF POSITION



# TP53, MA0106.2

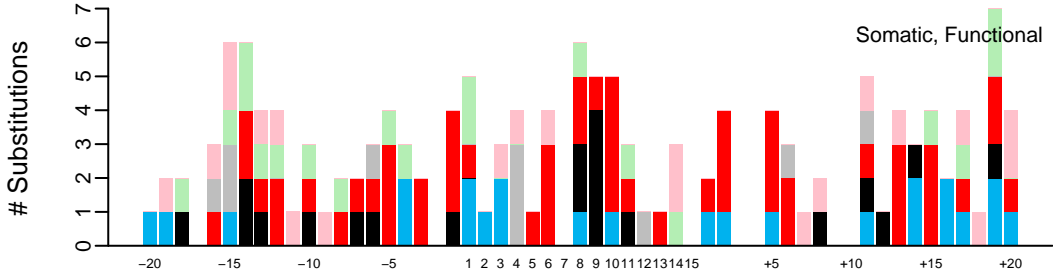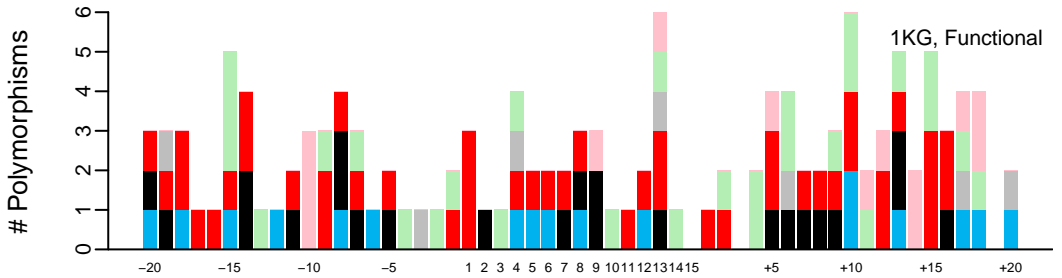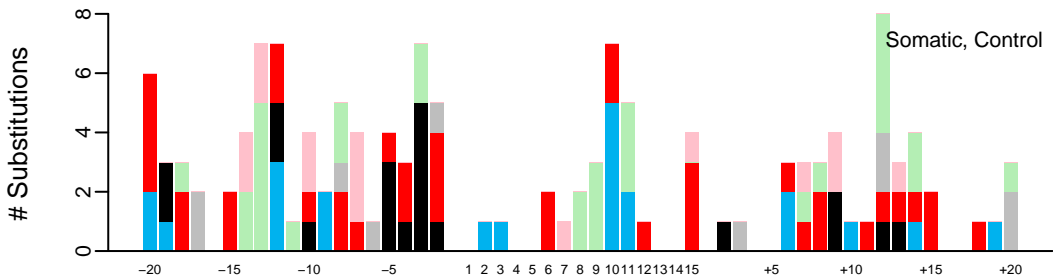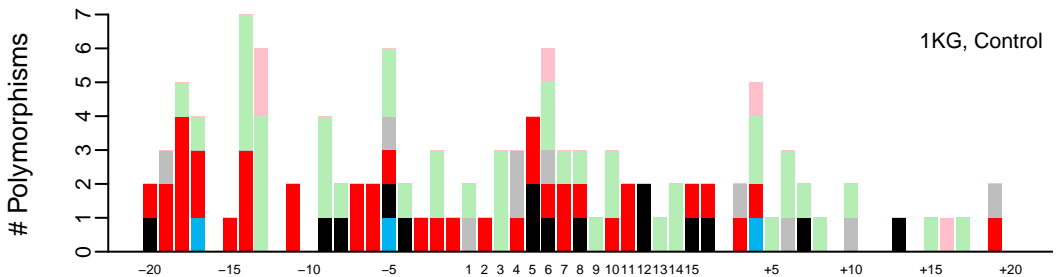

MOTIF POSITION

# HNF4A, MA0114.2

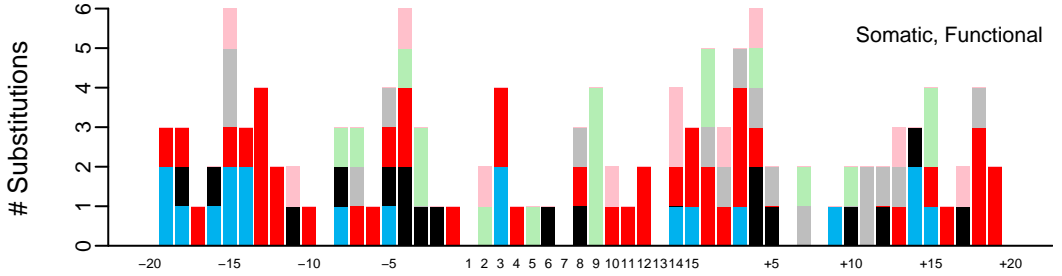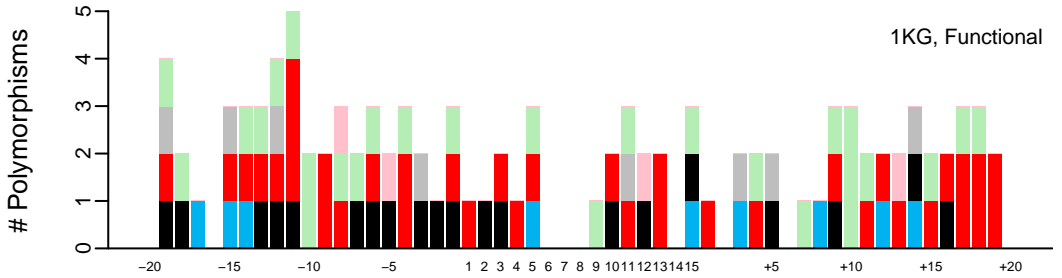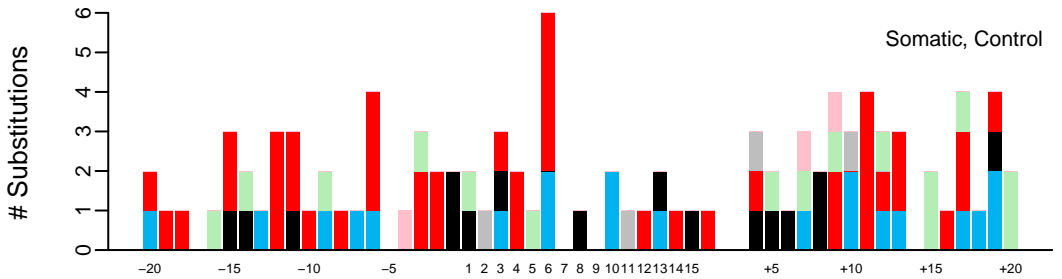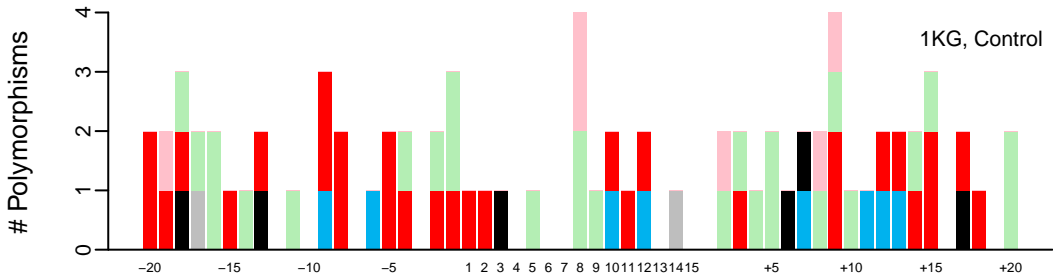

MOTIF POSITION

# STAT1, MA0137.3

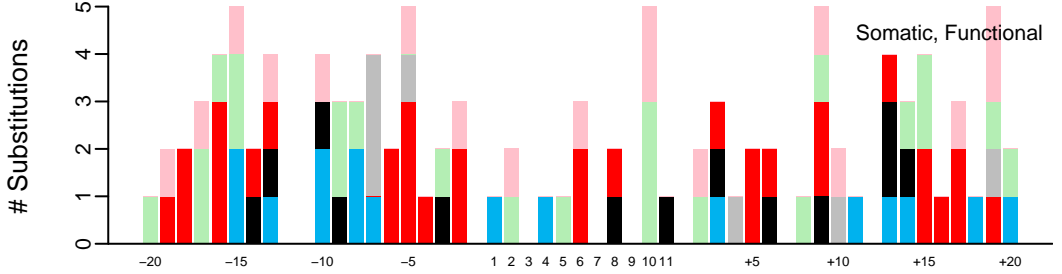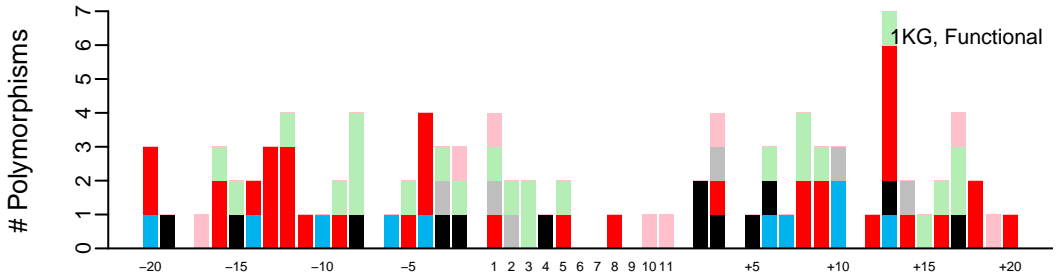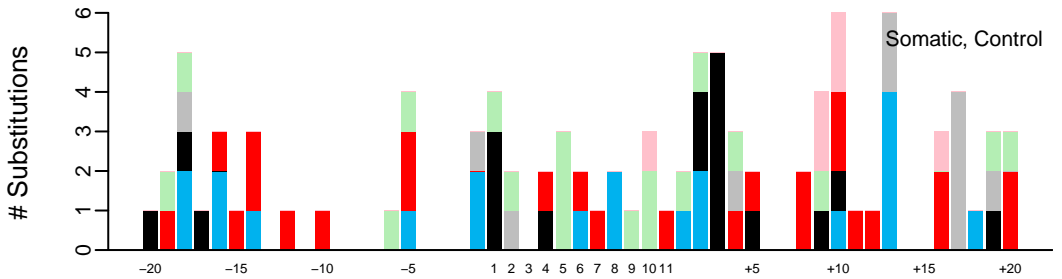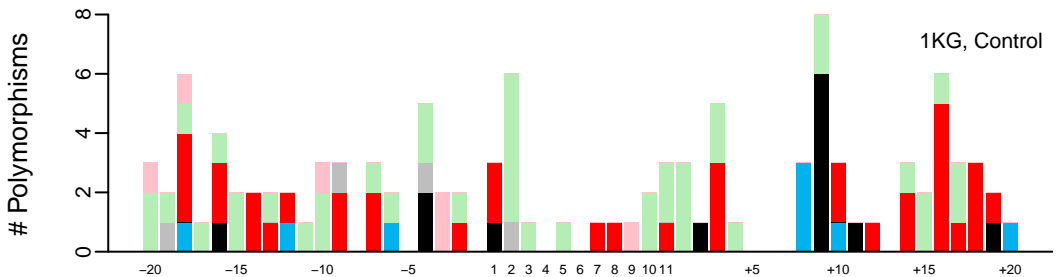

MOTIF POSITION

# NRSF, MA0138.2

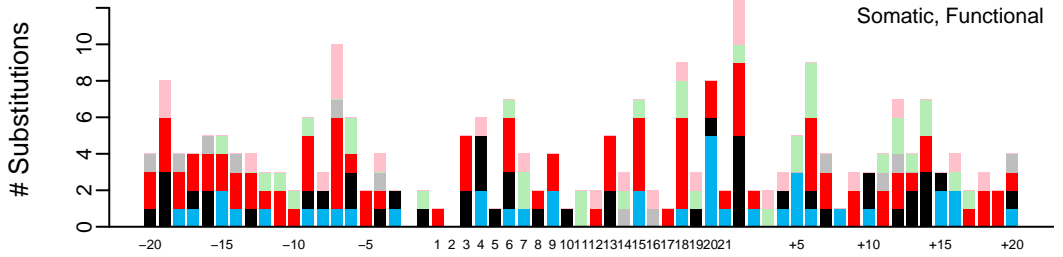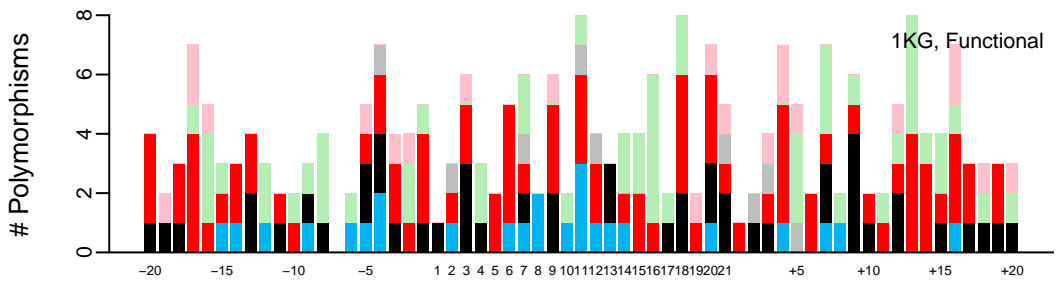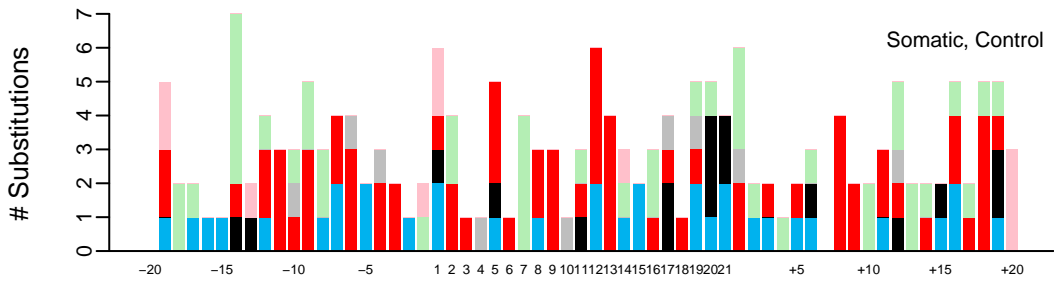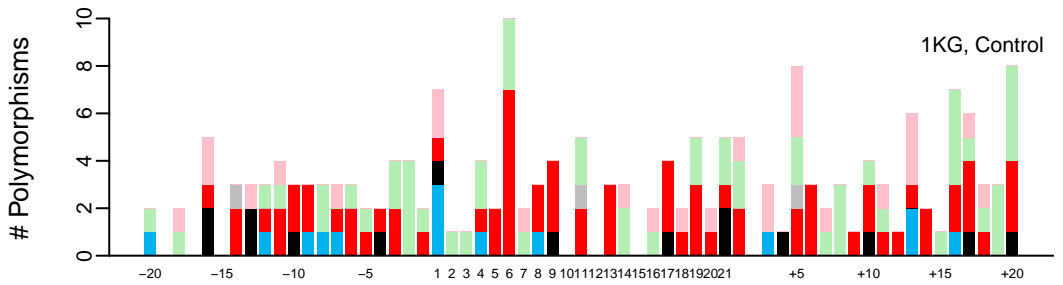

MOTIF POSITION

# CTCF, MA0139.1

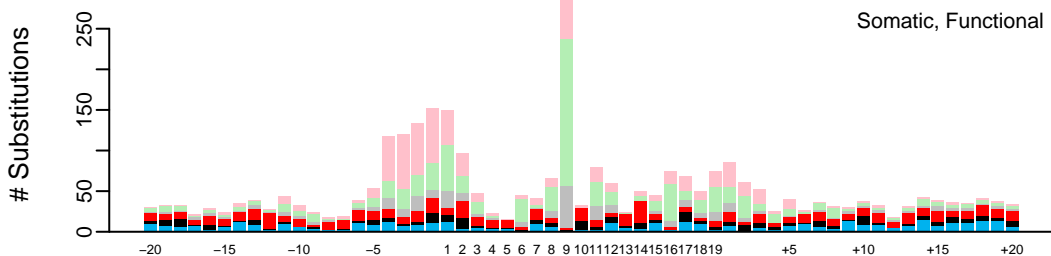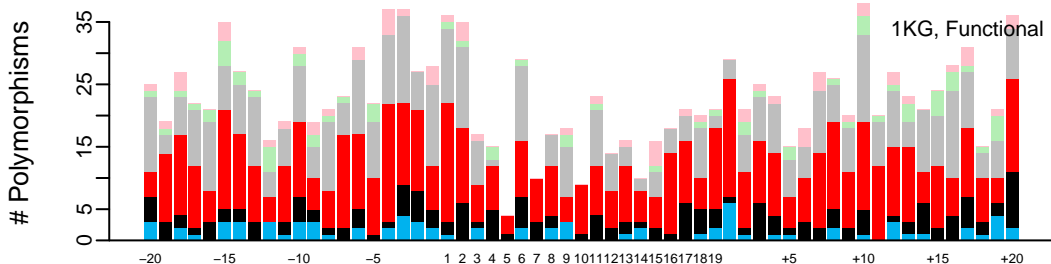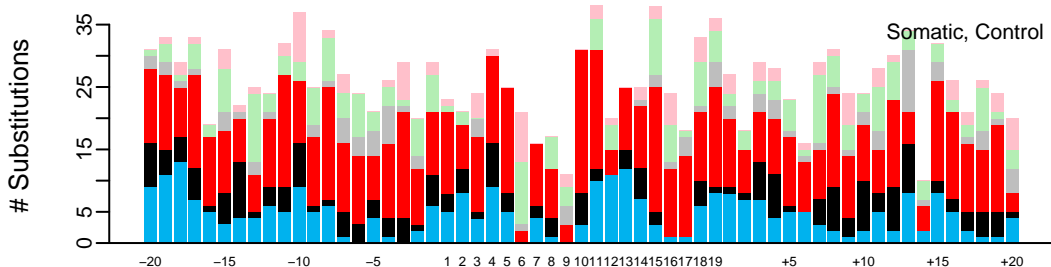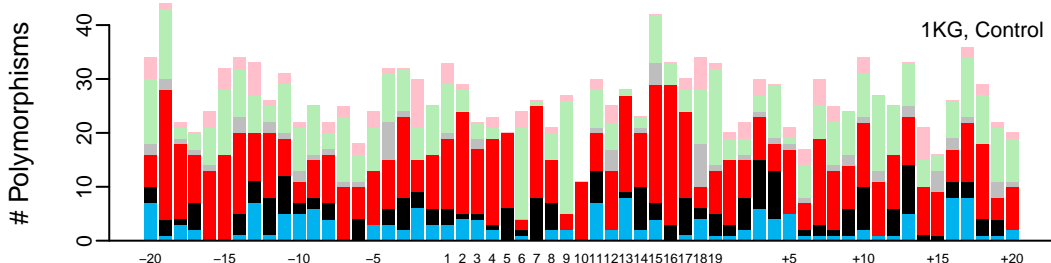

MOTIF POSITION

### TAL1::GATA1, MA0140.2

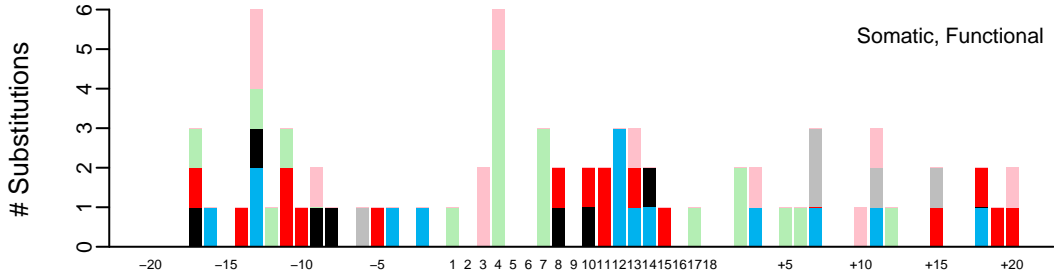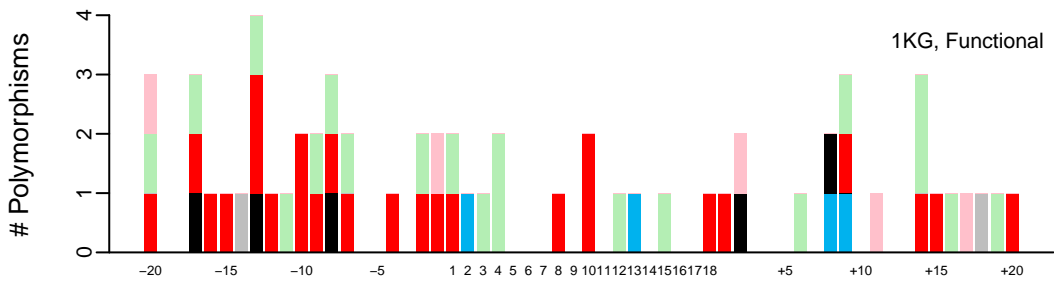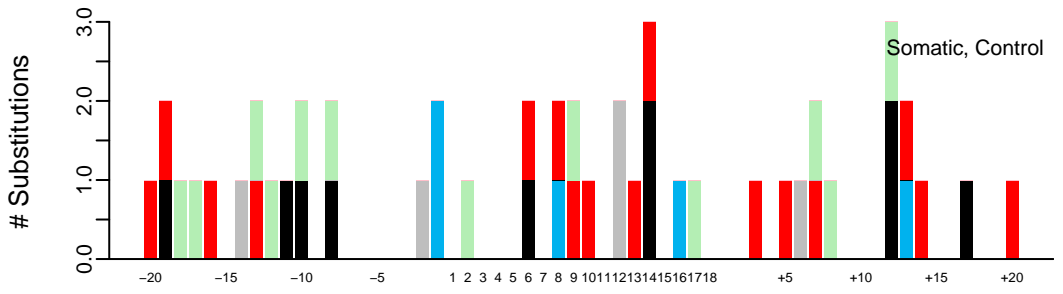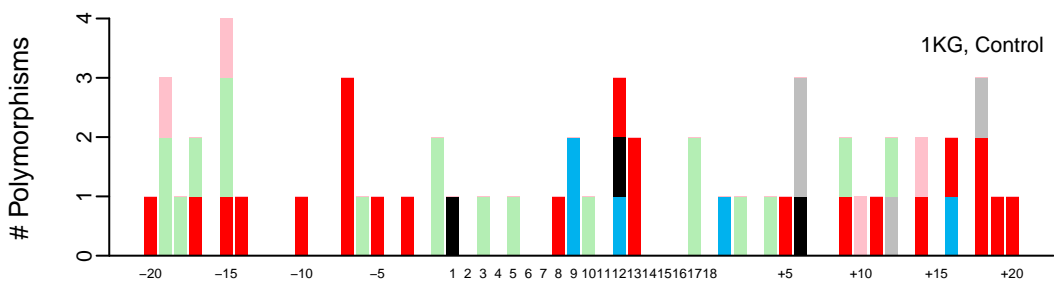

MOTIF POSITION

# STAT3, MA0144.2

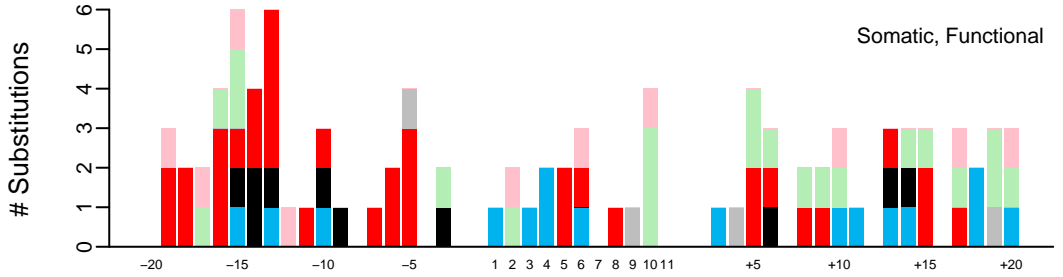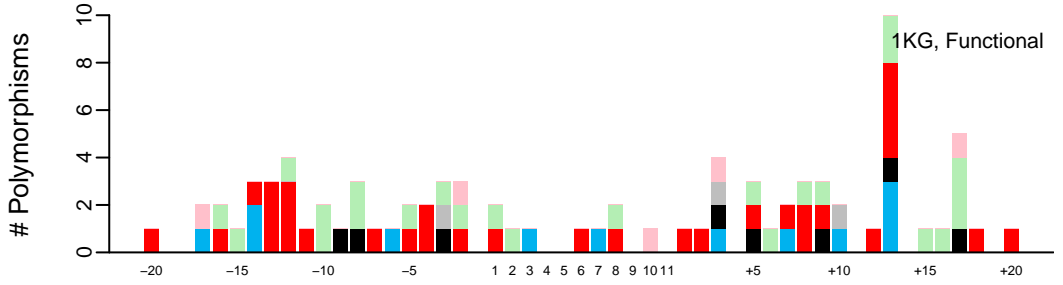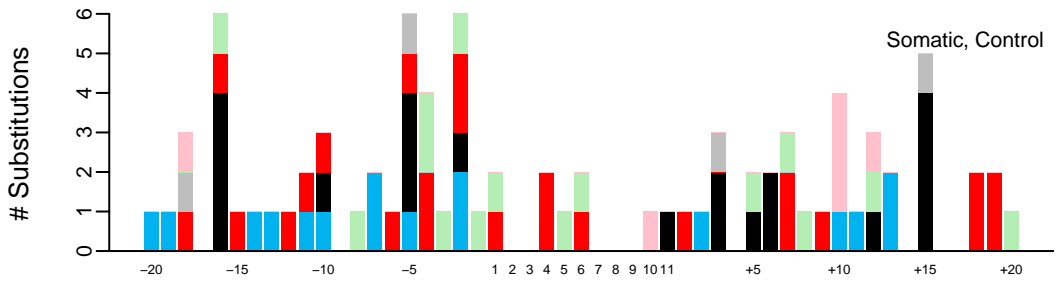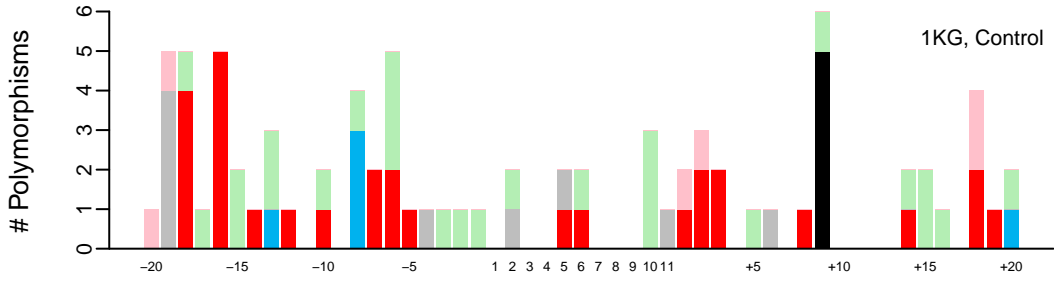

MOTIF POSITION

# CMYC, MA0147.2

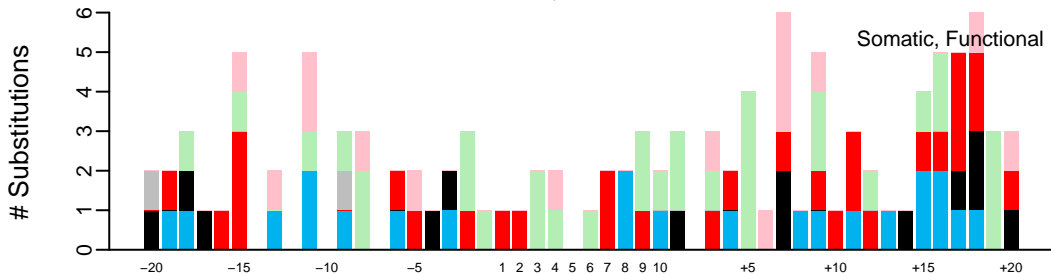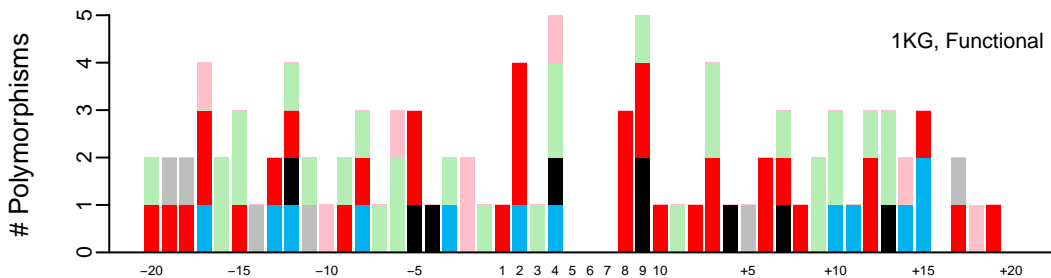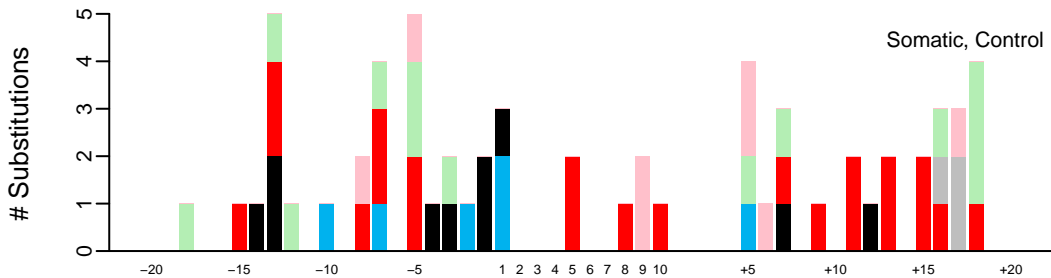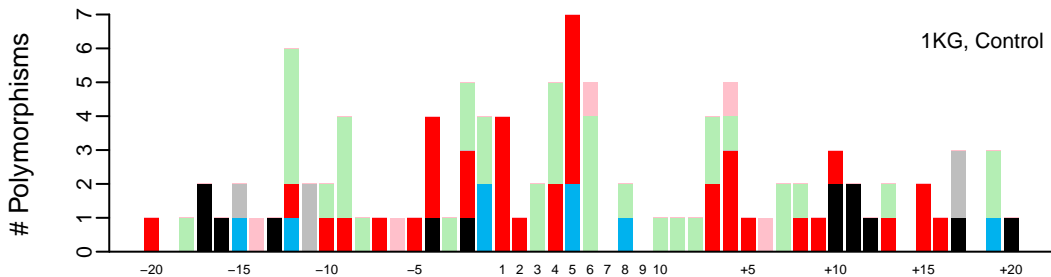

MOTIF POSITION



# FOXA1, MA0148.3

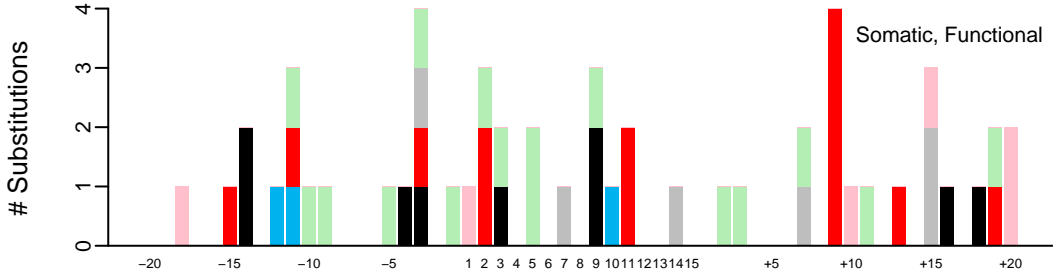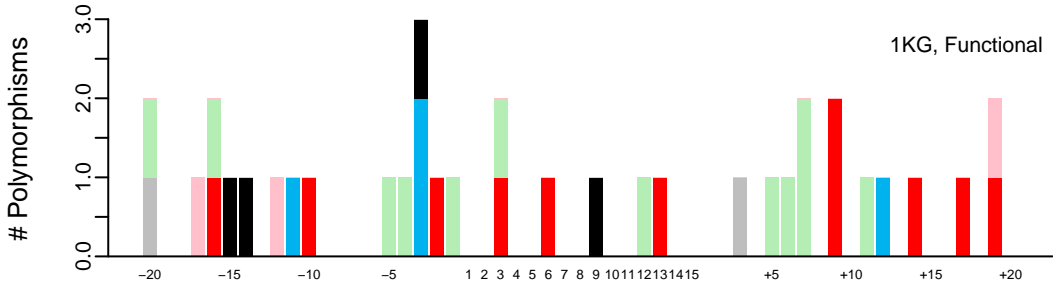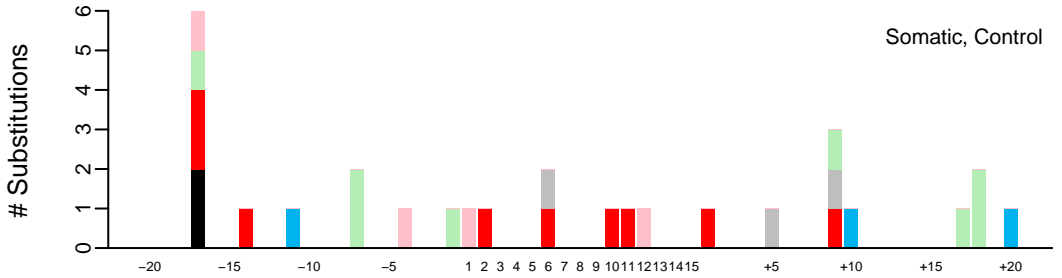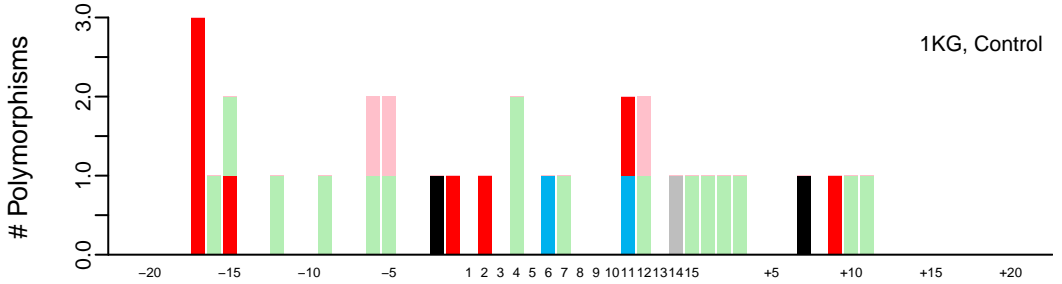

MOTIF POSITION

### EBF1, MA0154.2

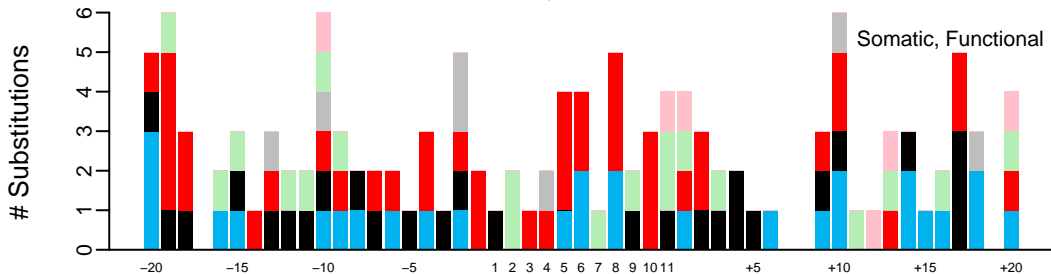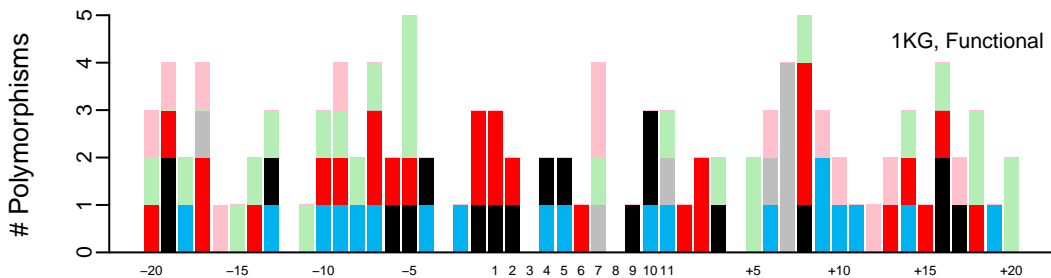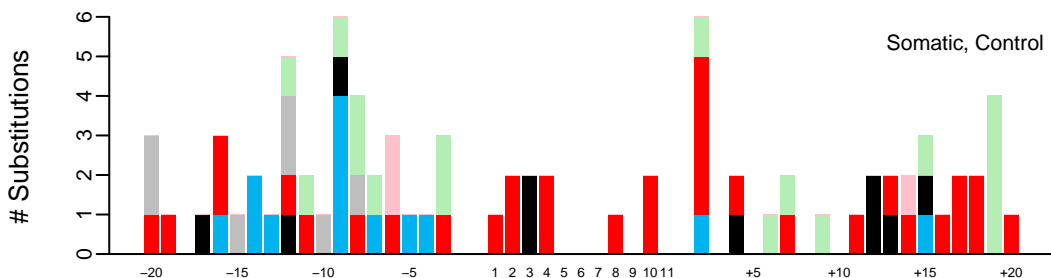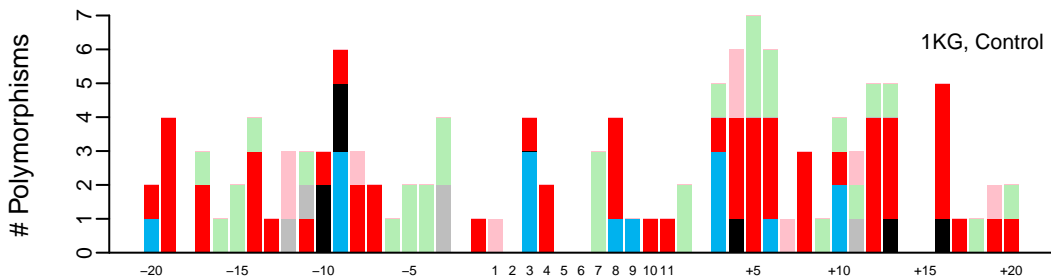

MOTIF POSITION

# EGR1, MA0162.2

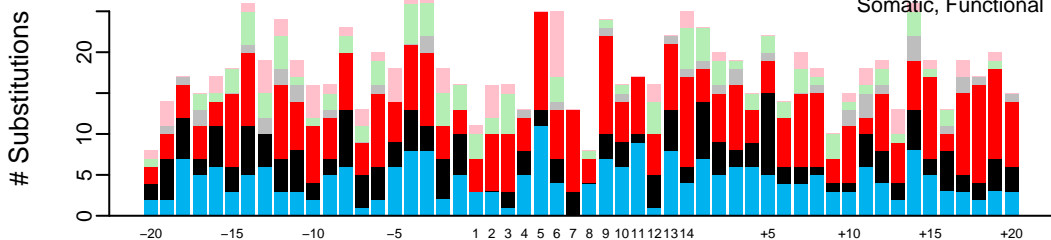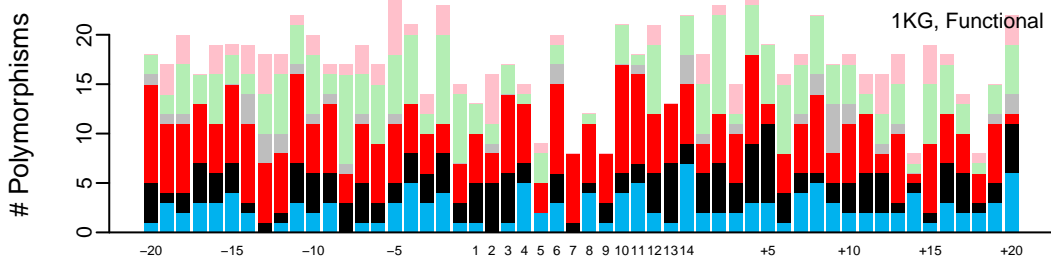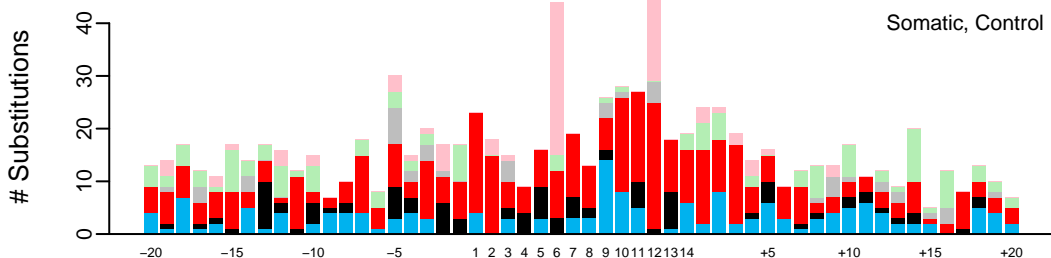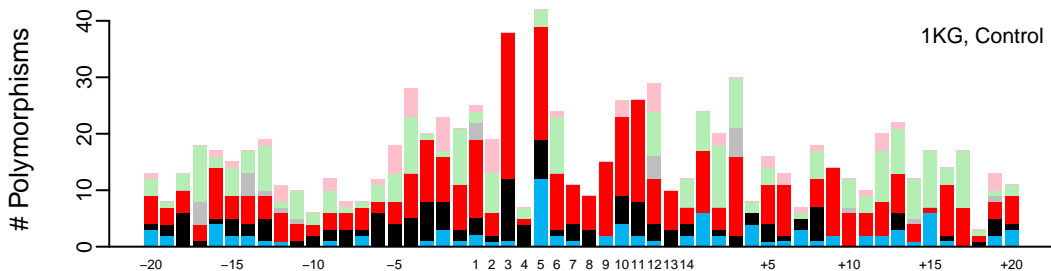

MOTIF POSITION

# PAX5, MA0239.1

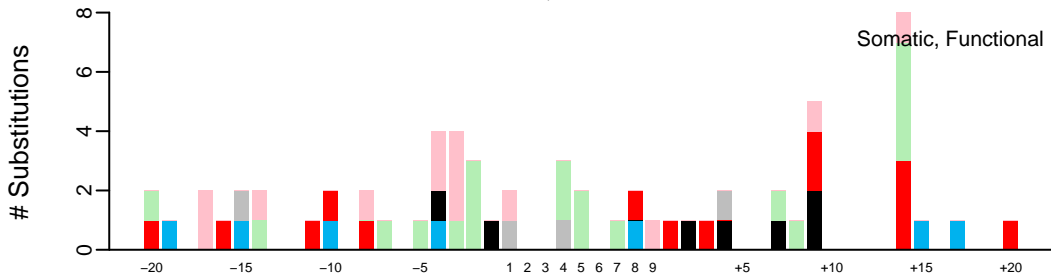

Somatic, Functional

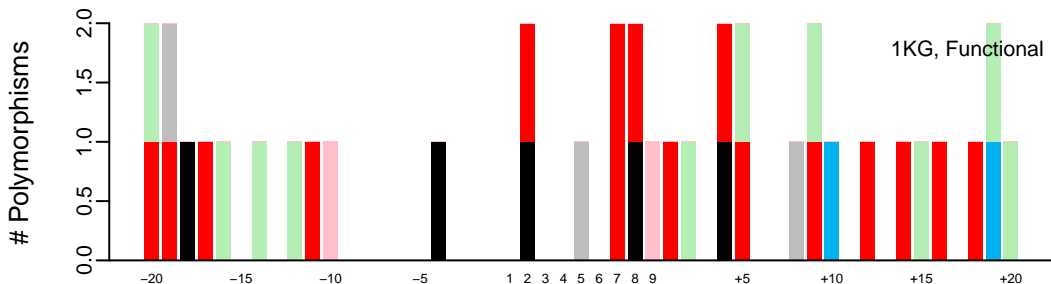

1KG, Functional

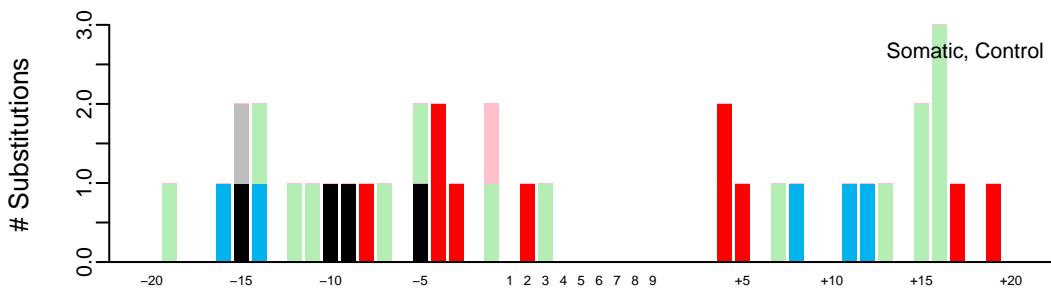

Somatic, Control

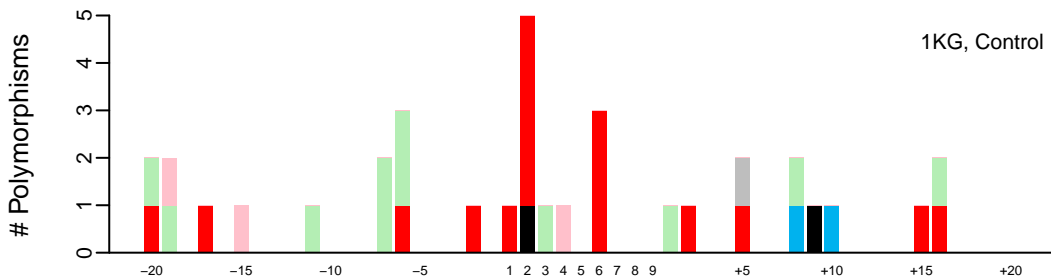

1KG, Control

MOTIF POSITION

# ESR2, MA0258.2

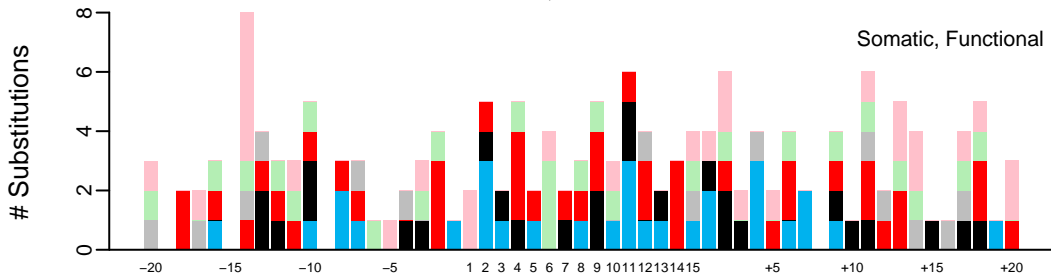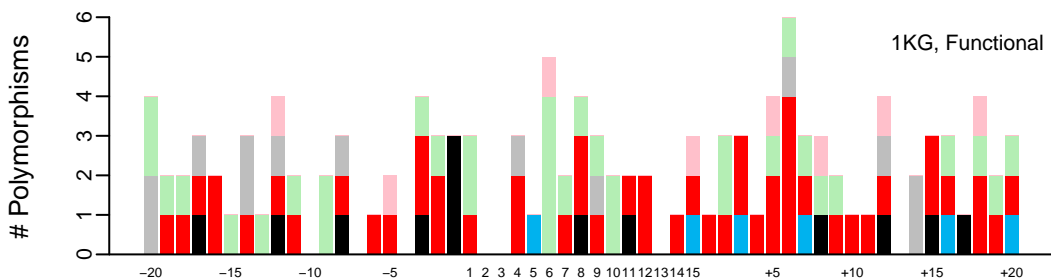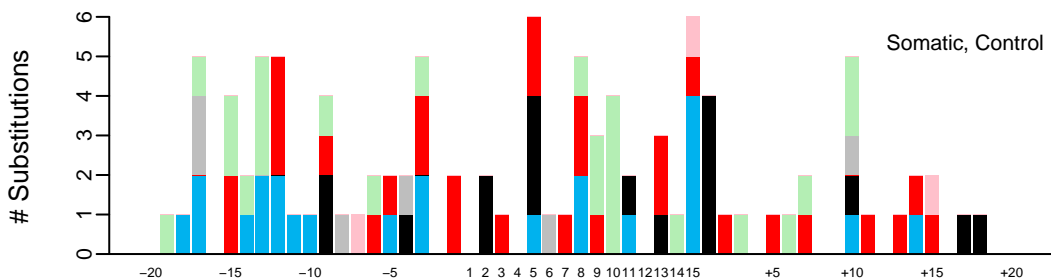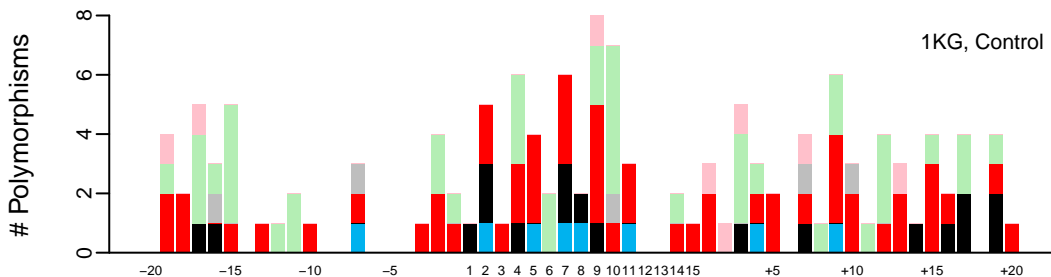

MOTIF POSITION

# USF1, MA0281.1

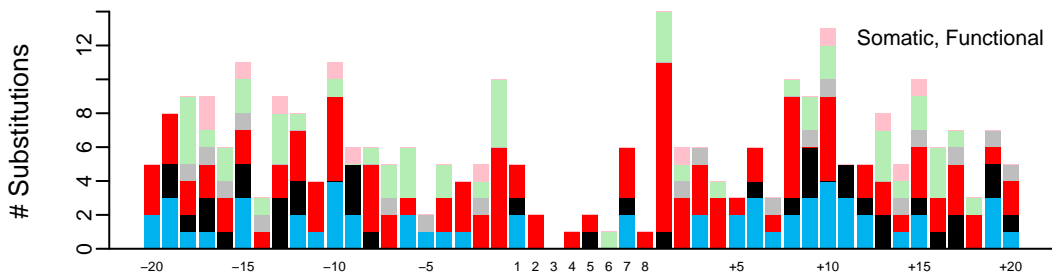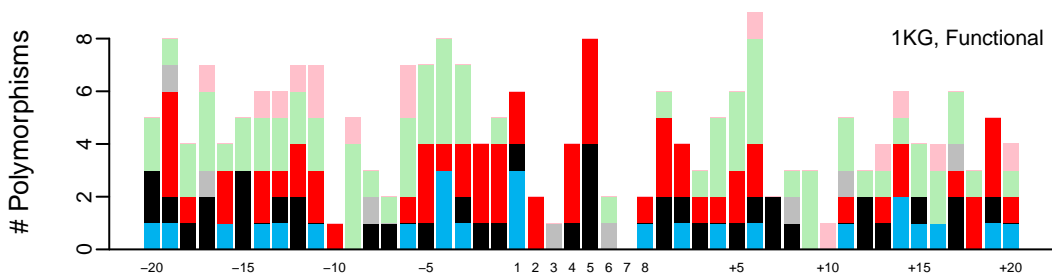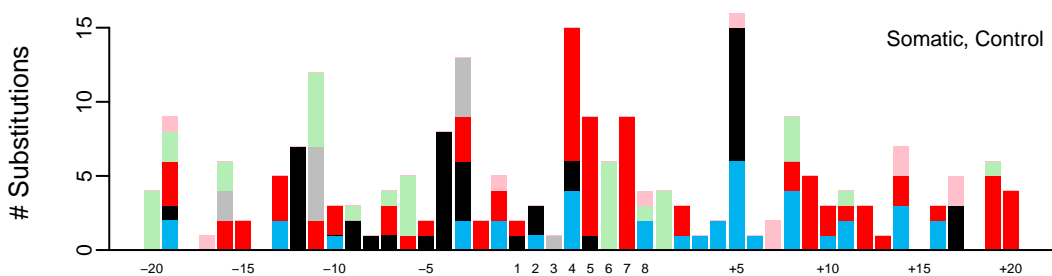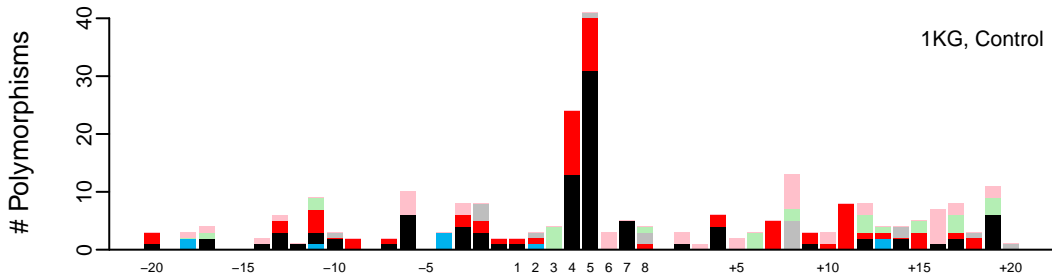

MOTIF POSITION

# CJUN, MA0303.1

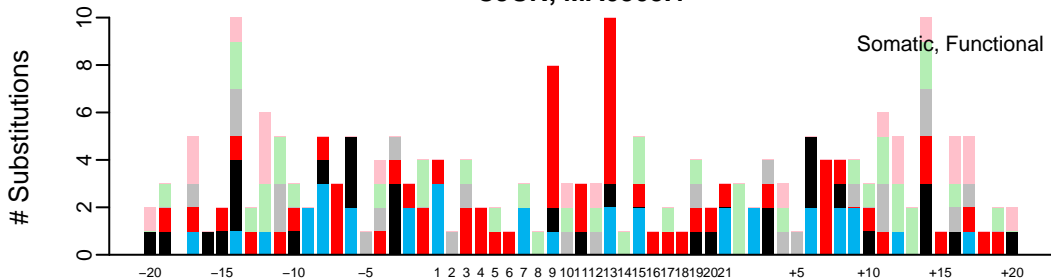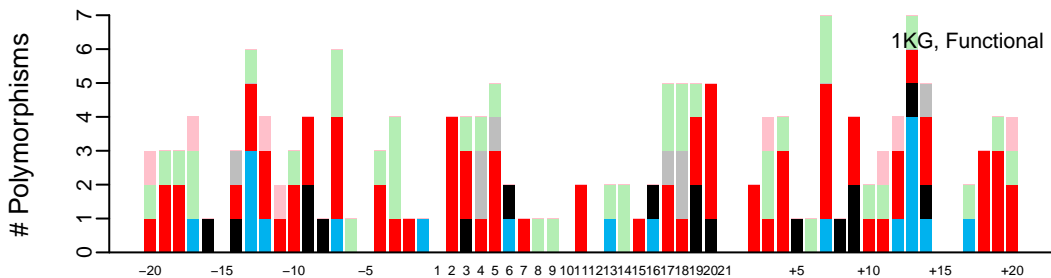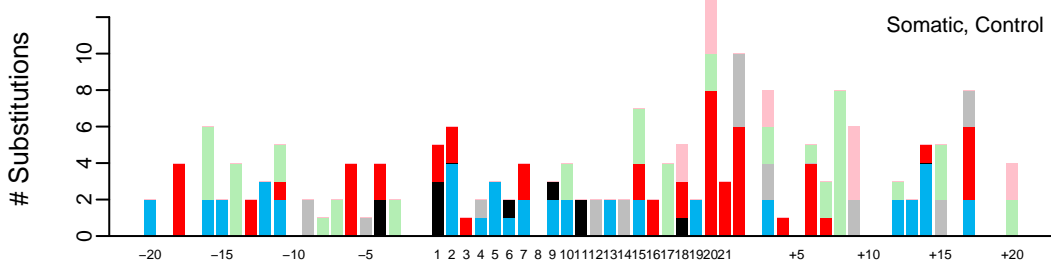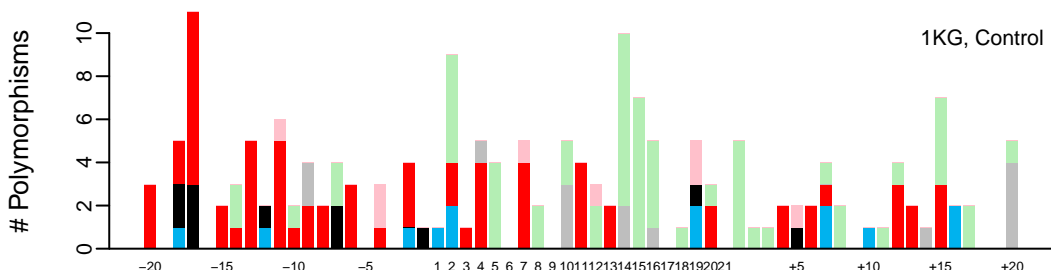

MOTIF POSITION

# PBX3, MA0318.1

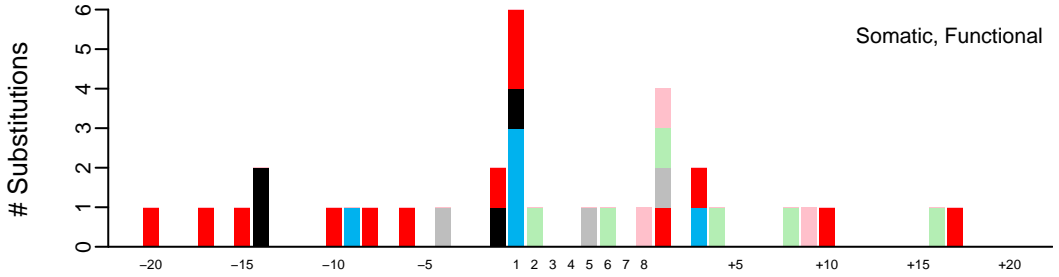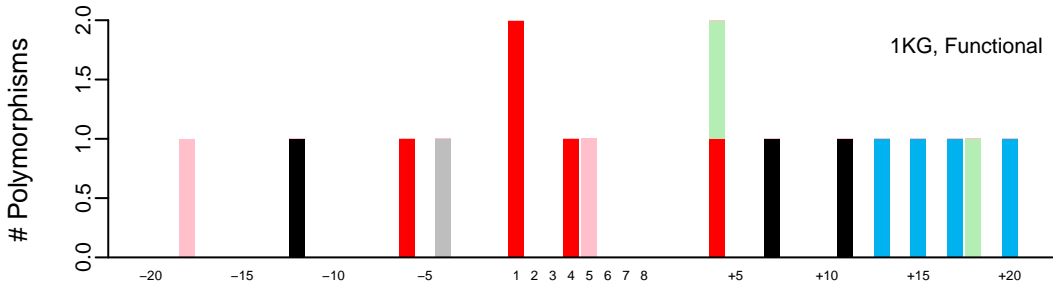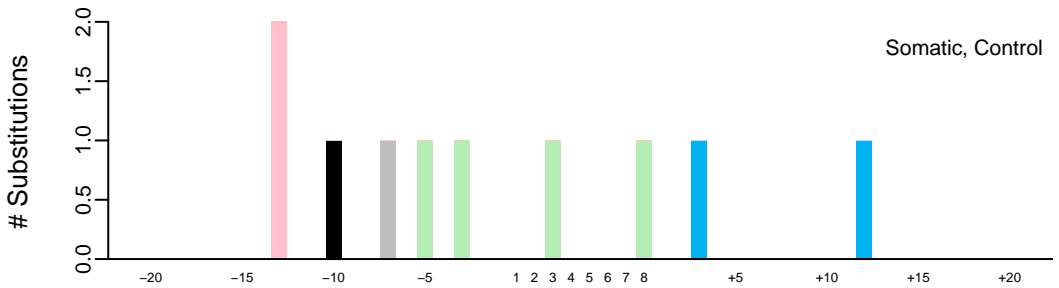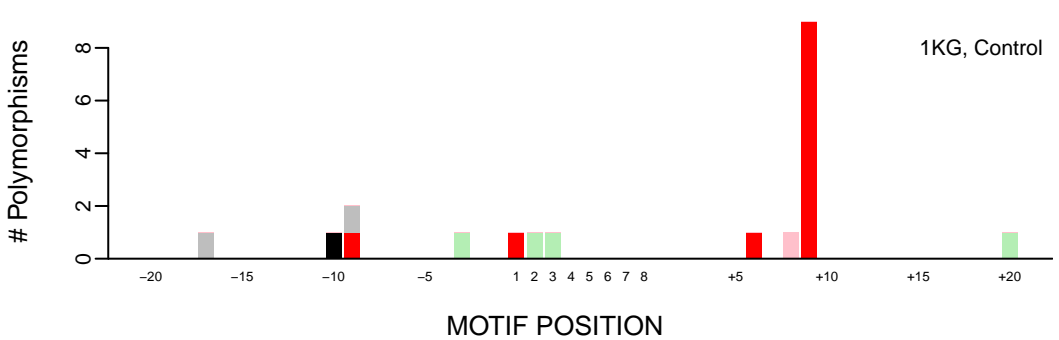

MOTIF POSITION



### PBX3, MA0328.1

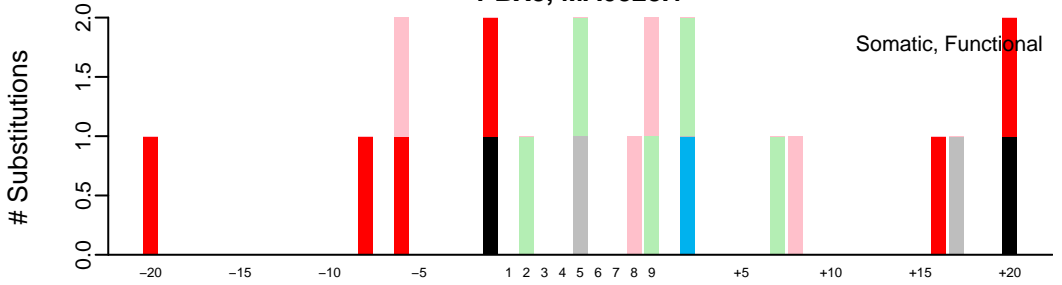

Somatic, Functional

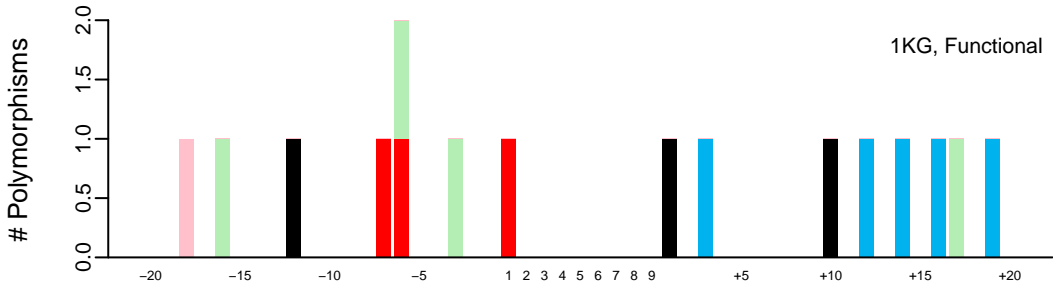

1KG, Functional

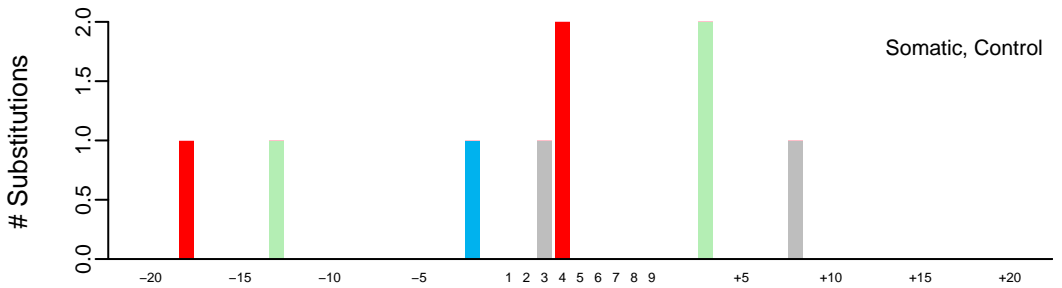

Somatic, Control

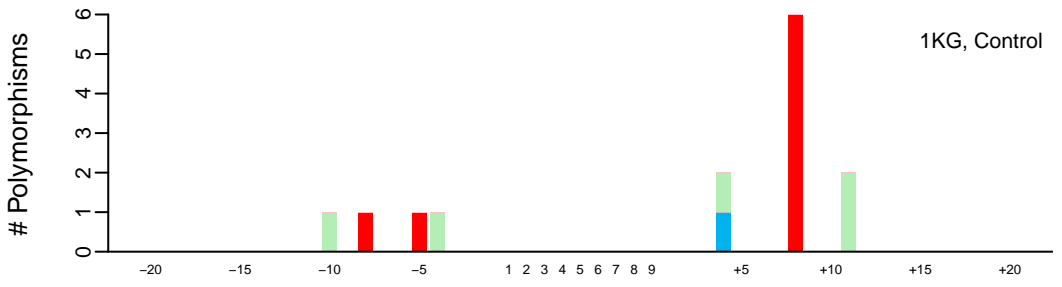

1KG, Control

MOTIF POSITION

# SRF, MA0331.1

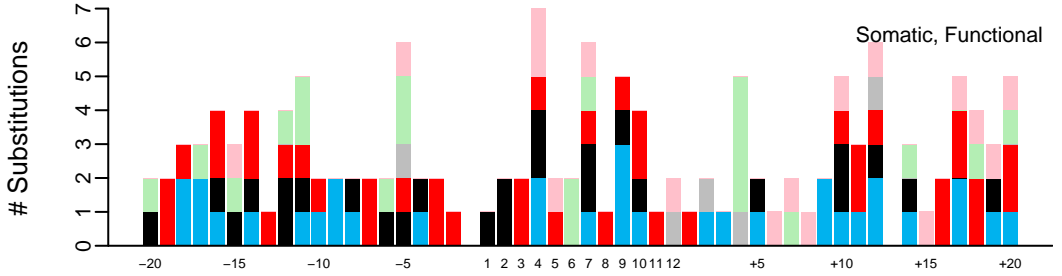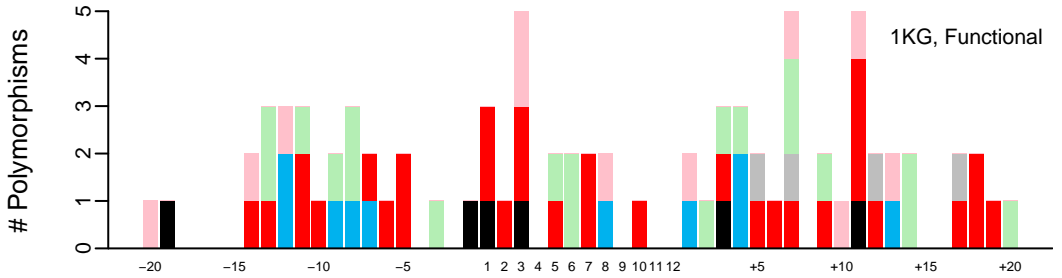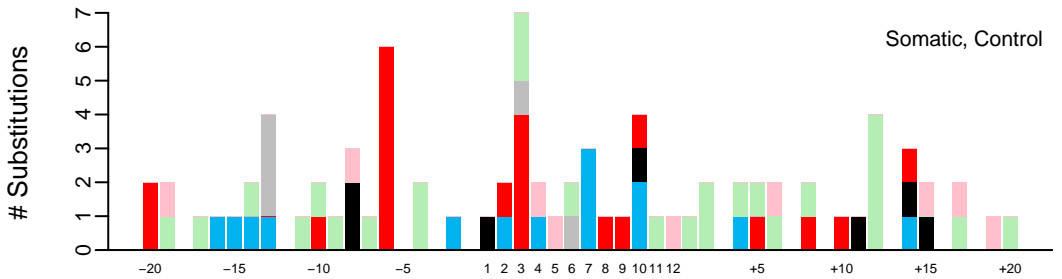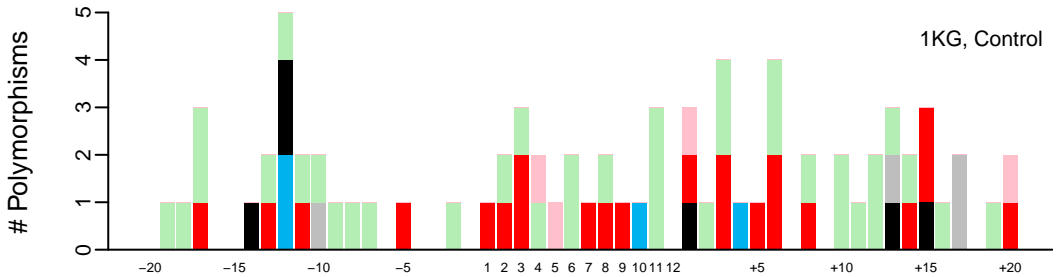

MOTIF POSITION

# EGR1, MA0337.1

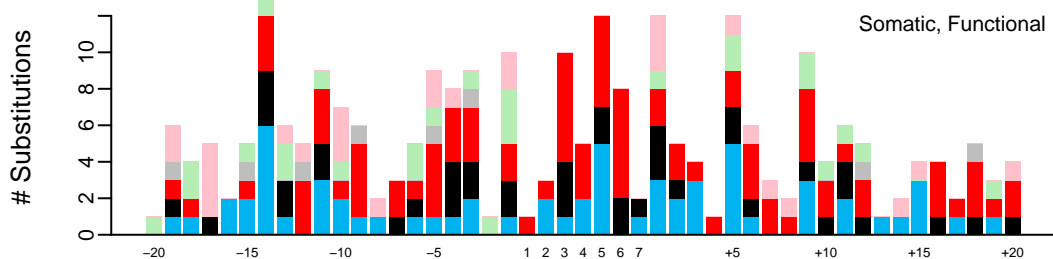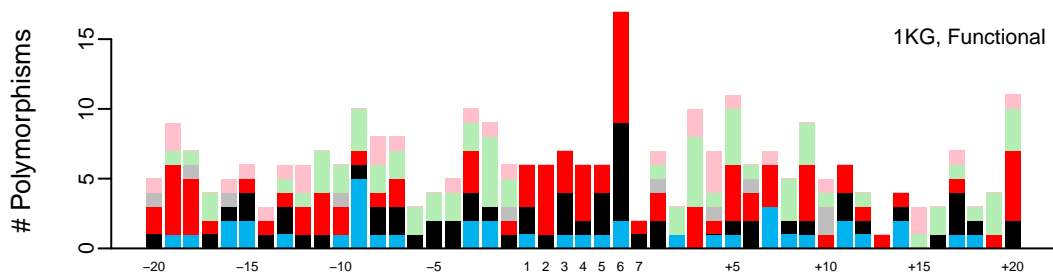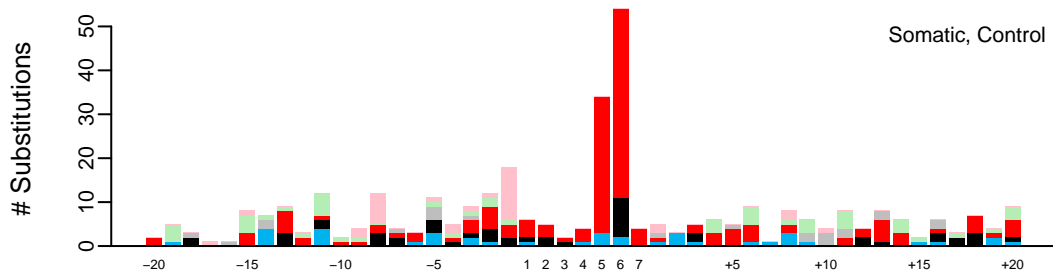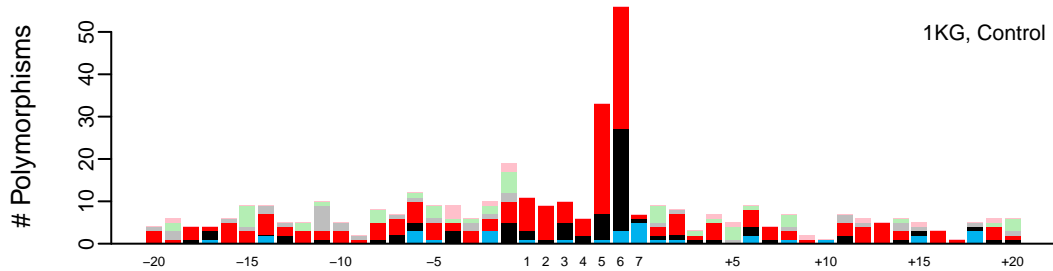

MOTIF POSITION

# MEF2A, MA0383.1

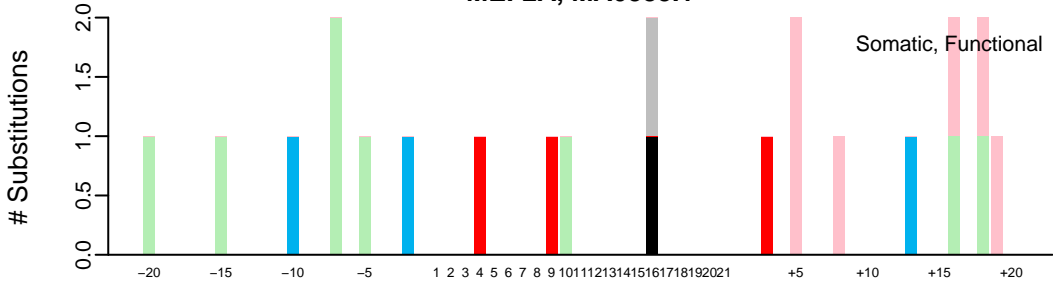

Somatic, Functional

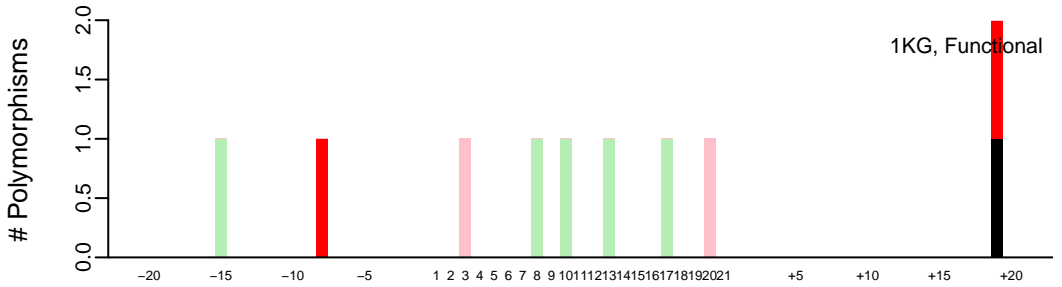

1KG, Functional

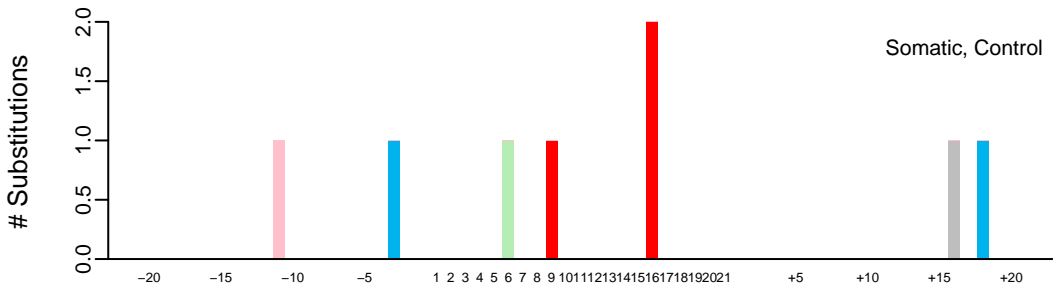

Somatic, Control

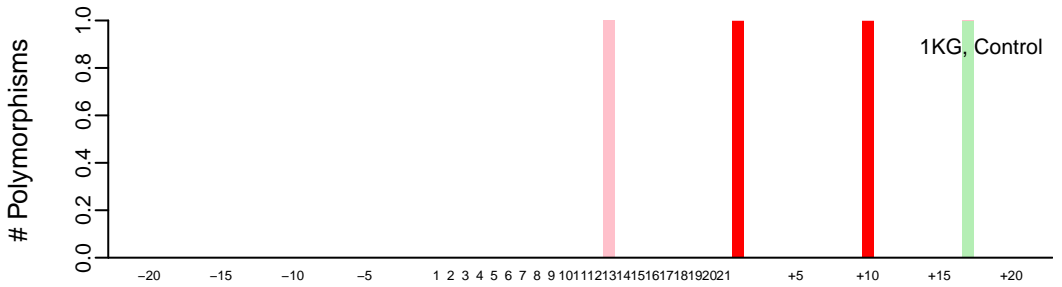

1KG, Control

MOTIF POSITION

# SREBP1, MA0409.1

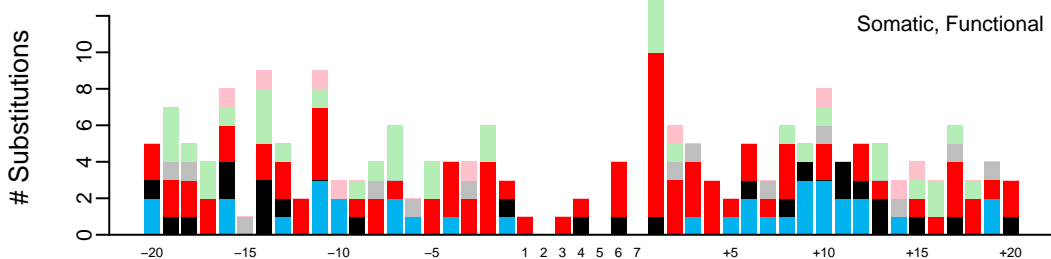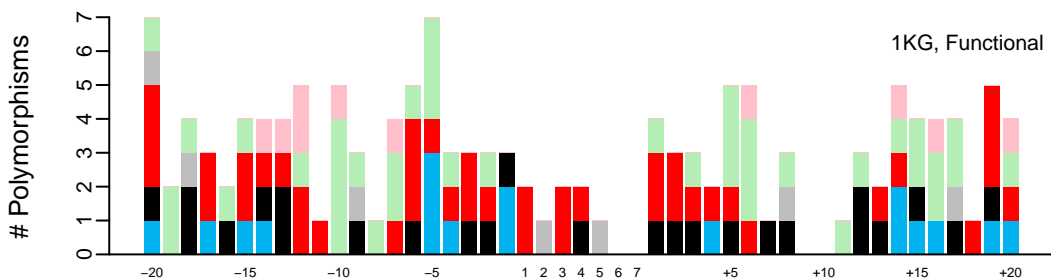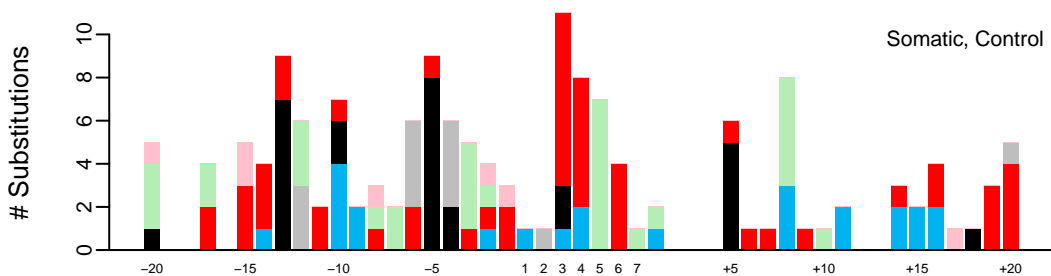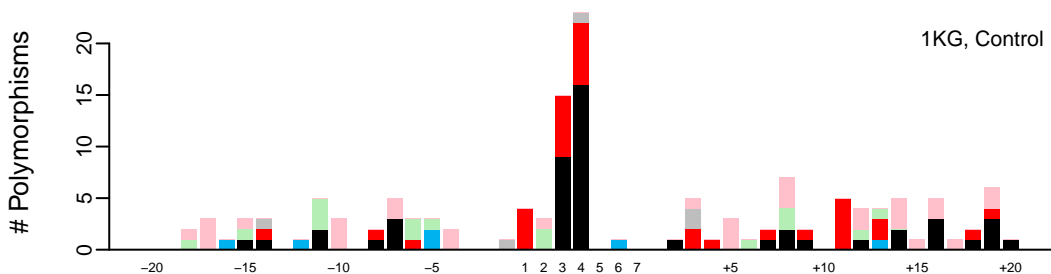

MOTIF POSITION

# EGR1, MA0423.1

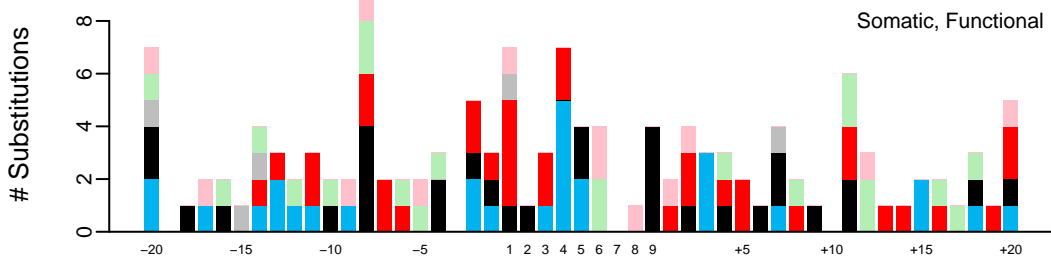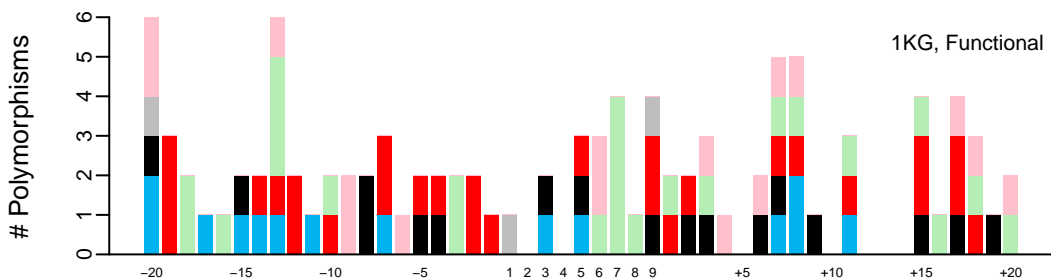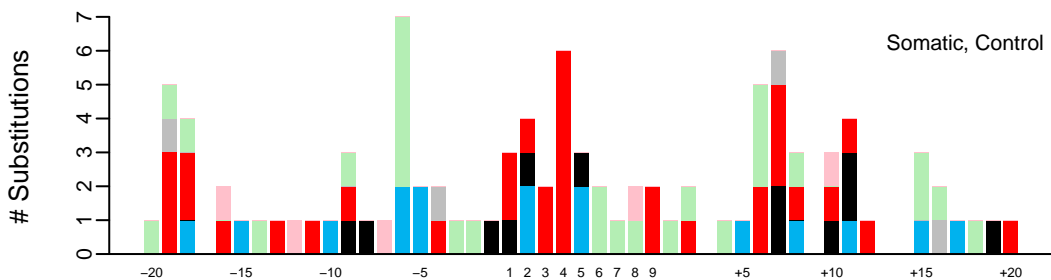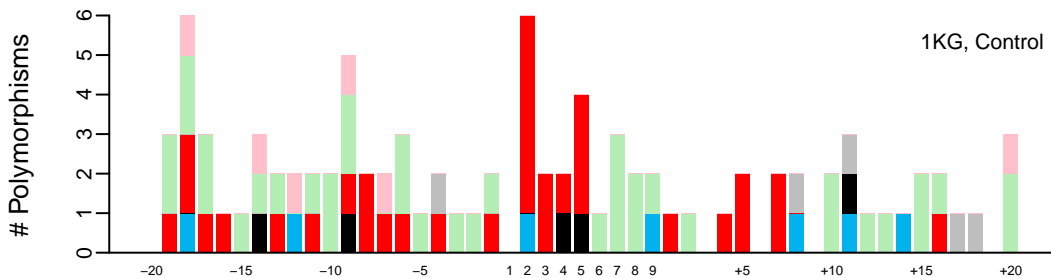

MOTIF POSITION

# FOXA2, MA0446.1

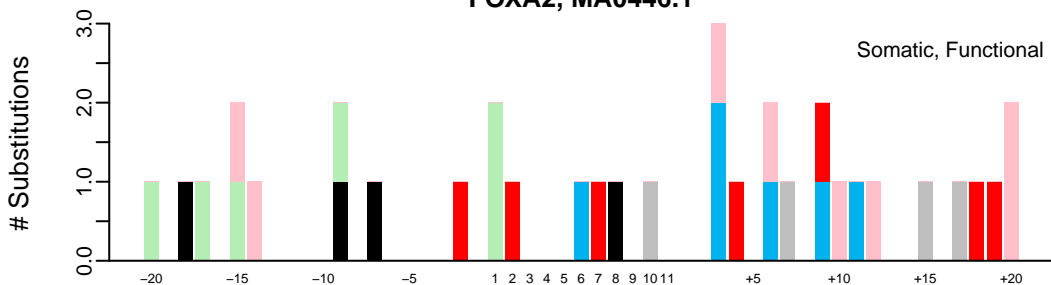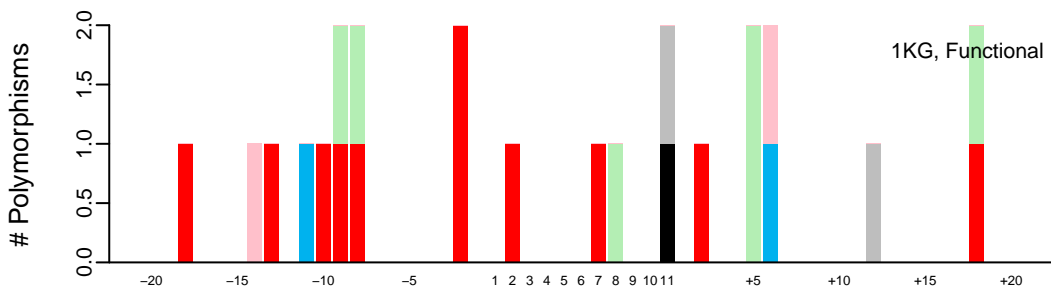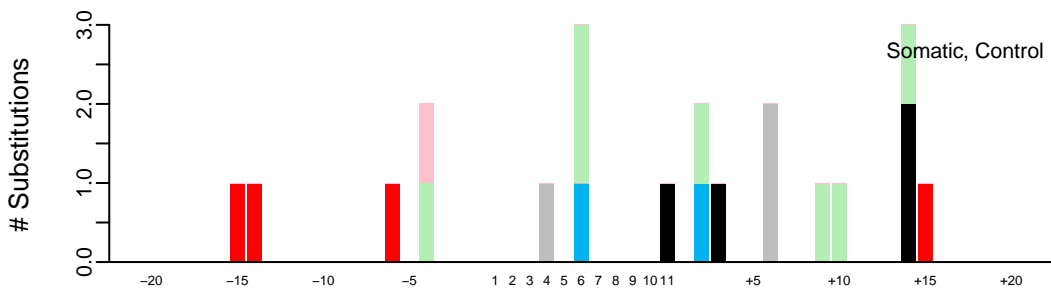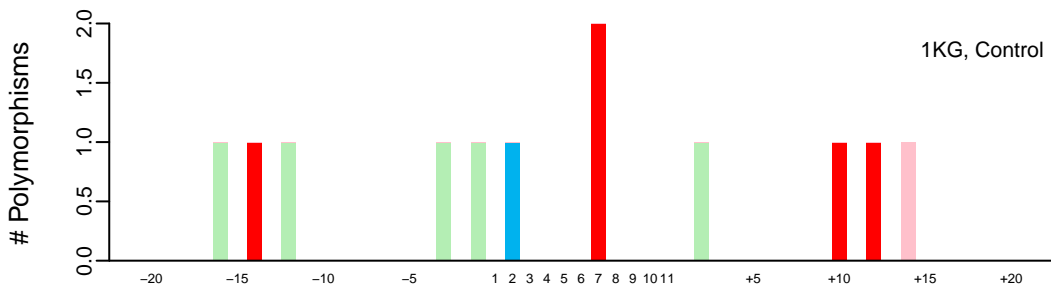

MOTIF POSITION

# BATF::JUN, MA0462.1

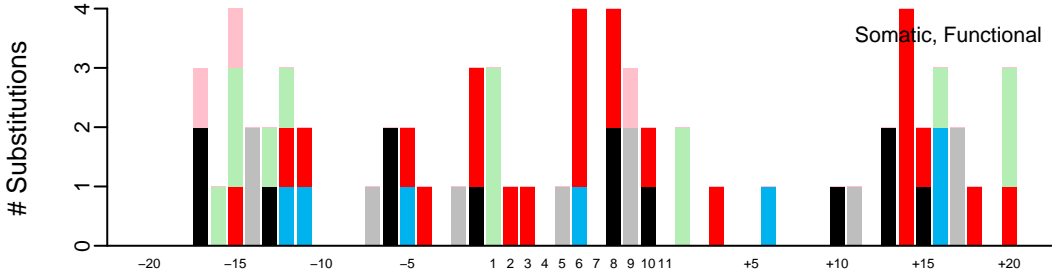

Somatic, Functional

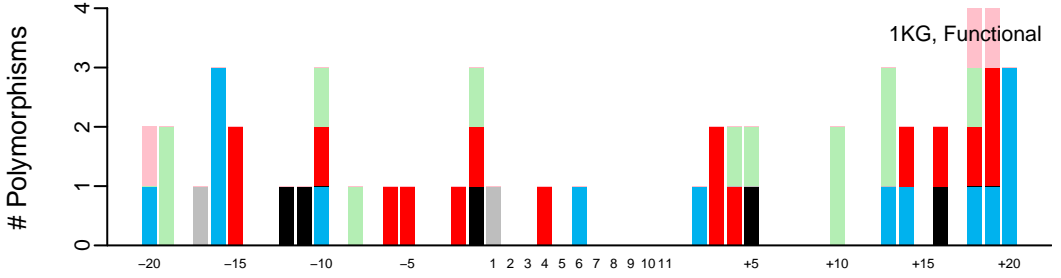

1KG, Functional

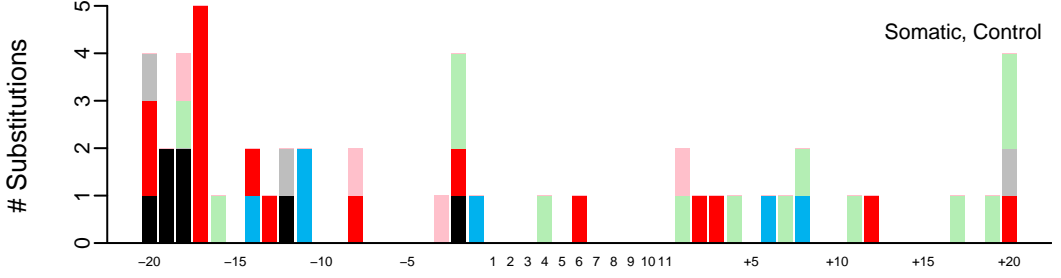

Somatic, Control

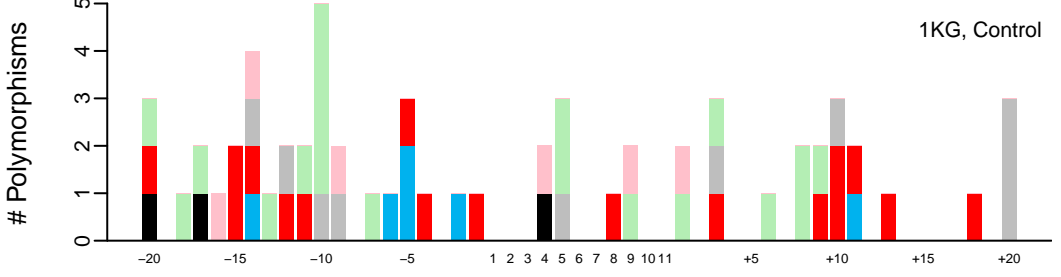

1KG, Control

MOTIF POSITION



### BHLHE40, MA0464.1

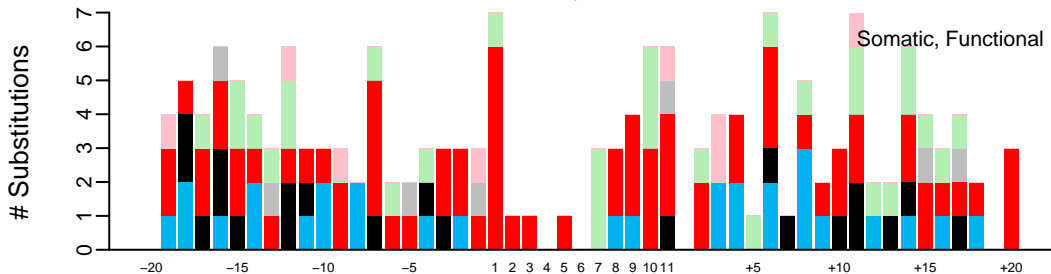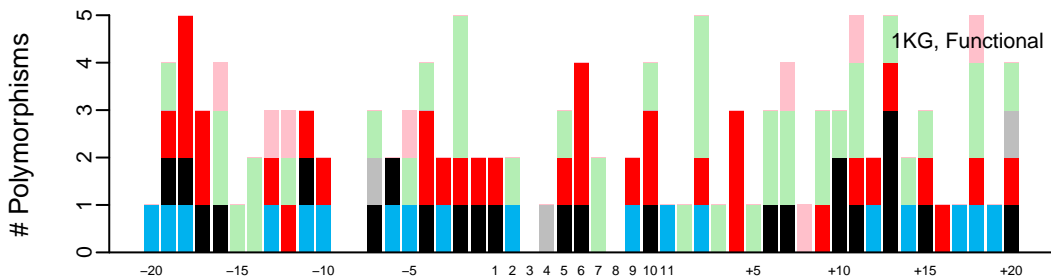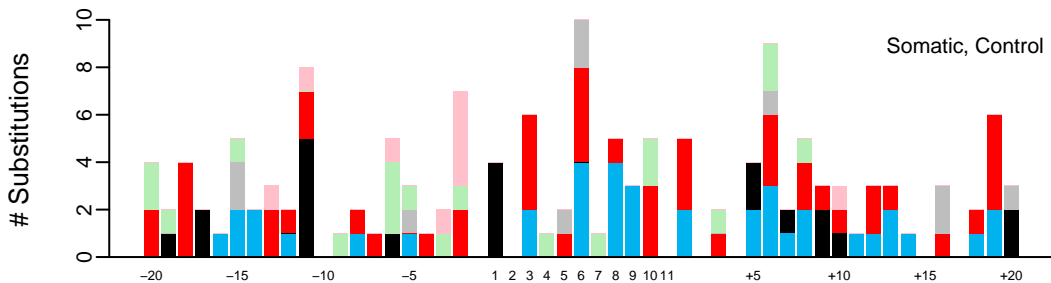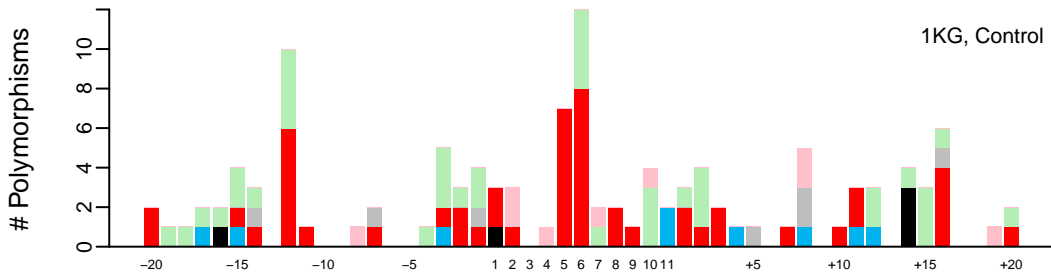

MOTIF POSITION

# CDX2, MA0465.1

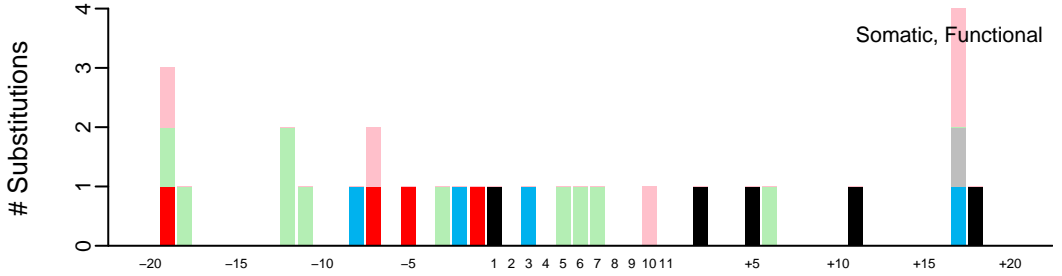

Somatic, Functional

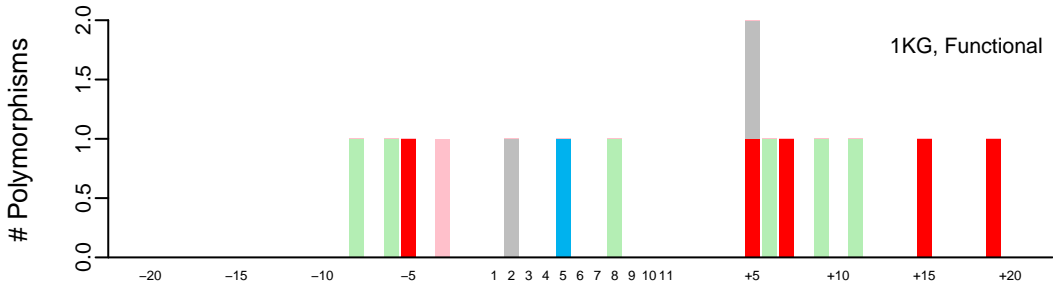

1KG, Functional

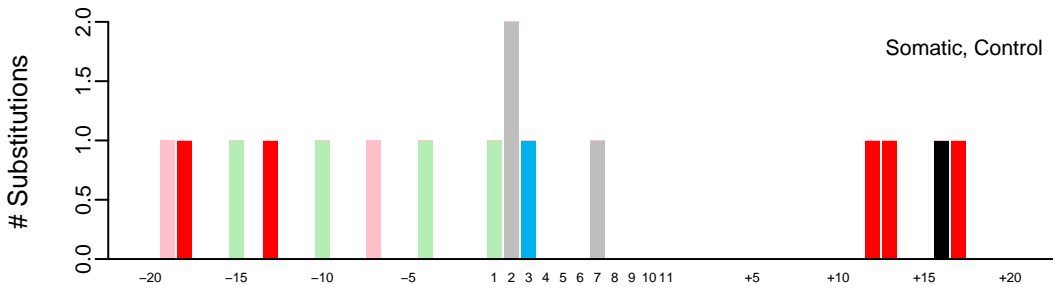

Somatic, Control

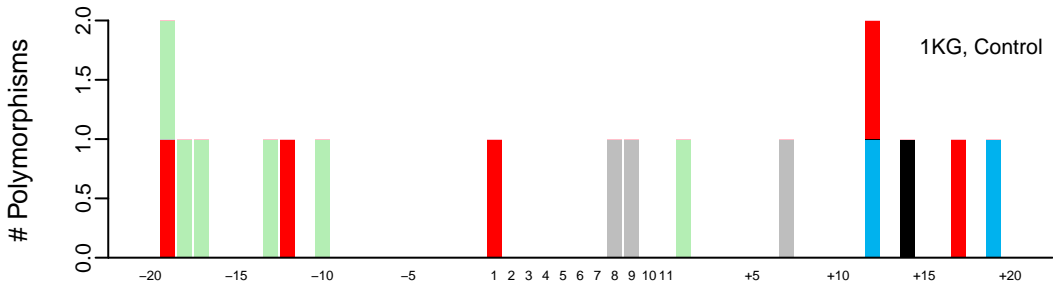

1KG, Control

MOTIF POSITION

# CEBPB, MA0466.1

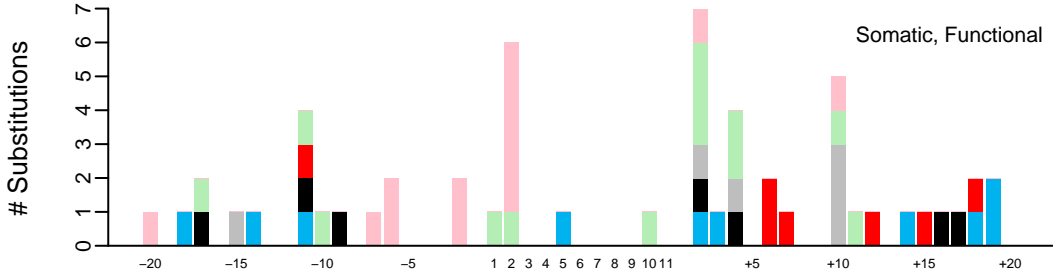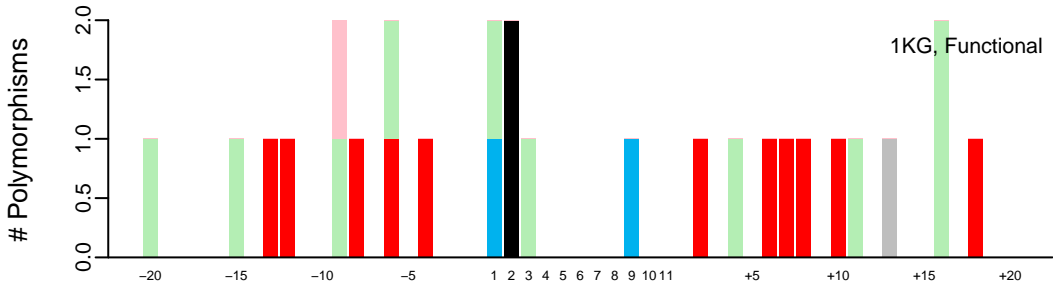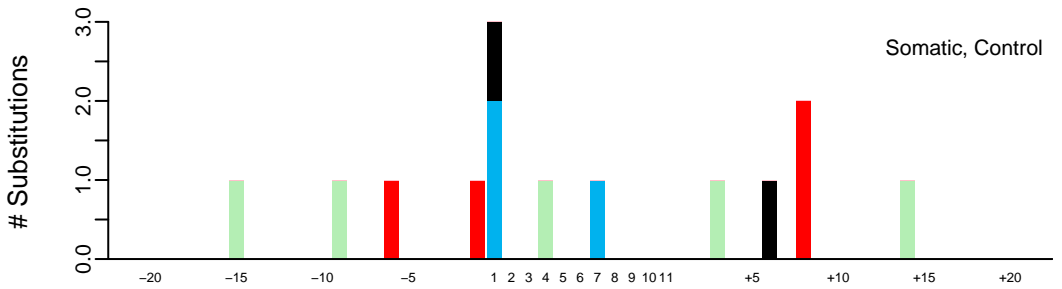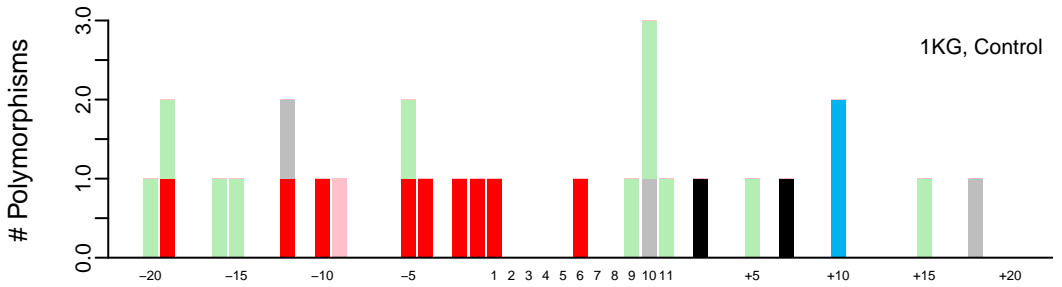

MOTIF POSITION

# DUX4, MA0468.1

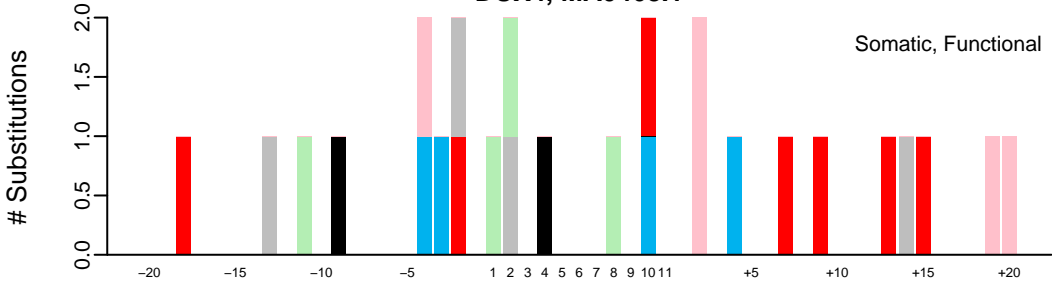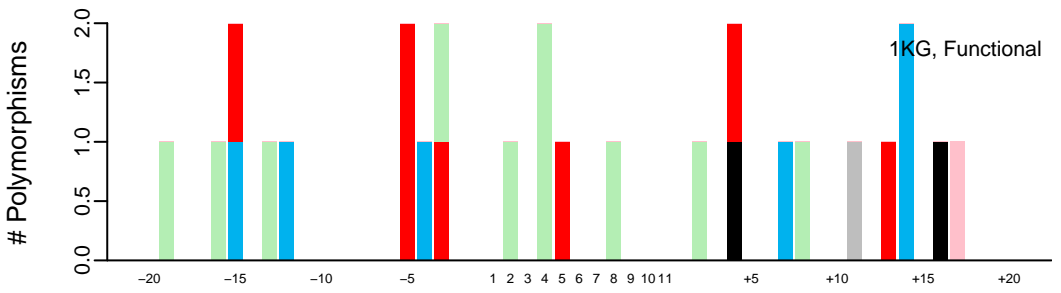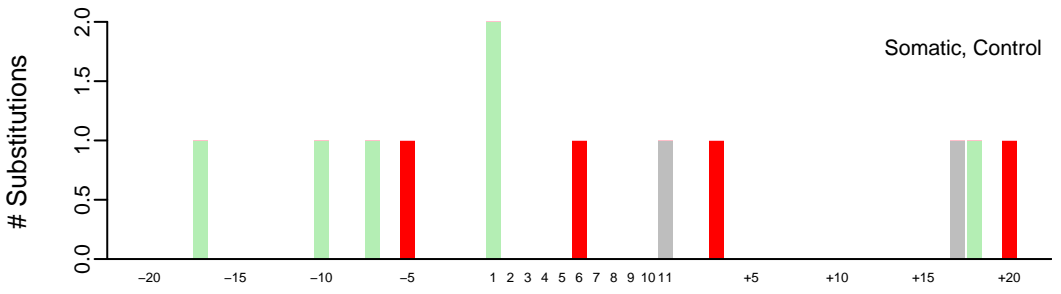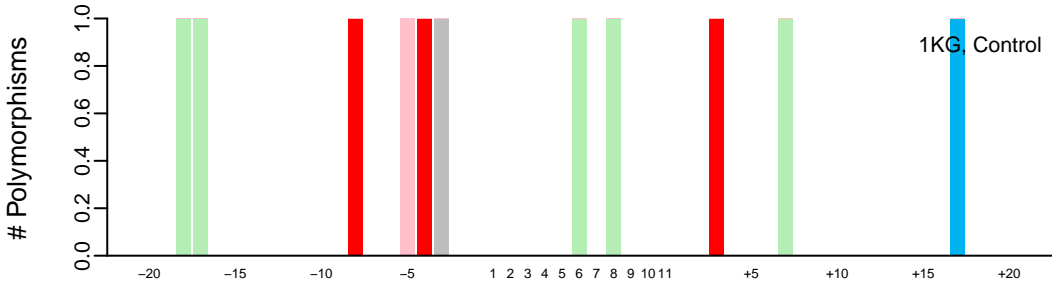

MOTIF POSITION

### E2F4, MA0470.1

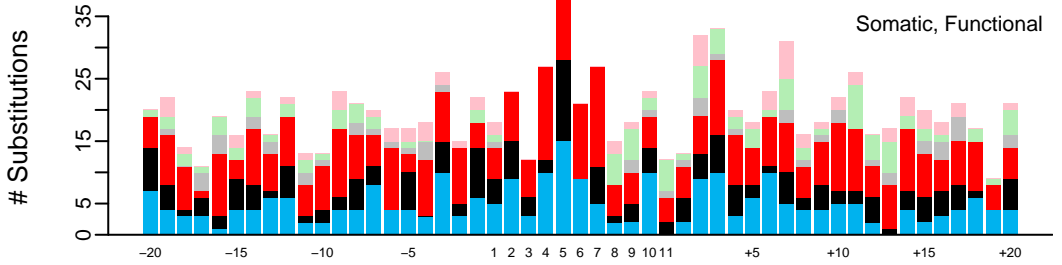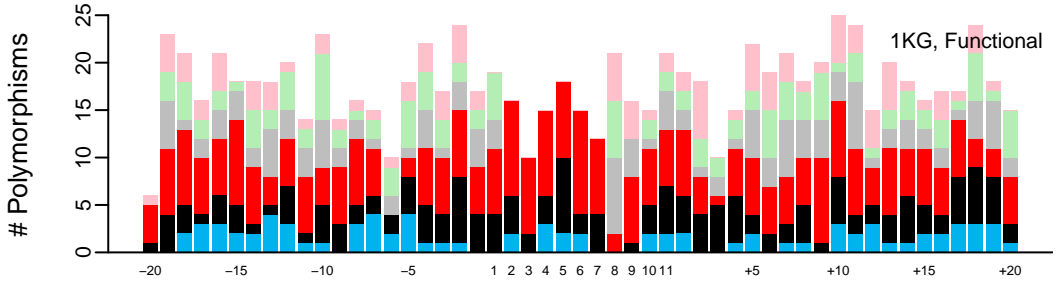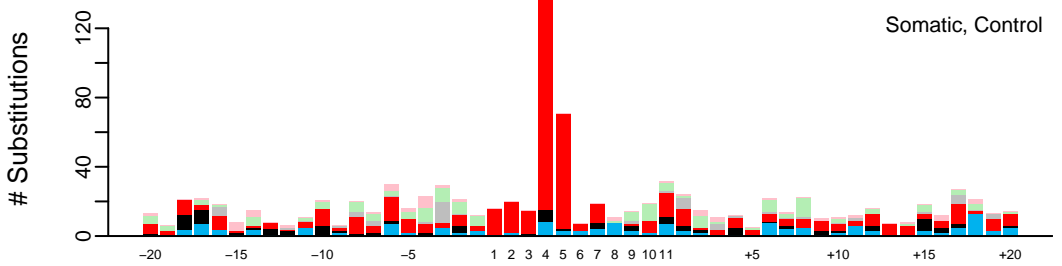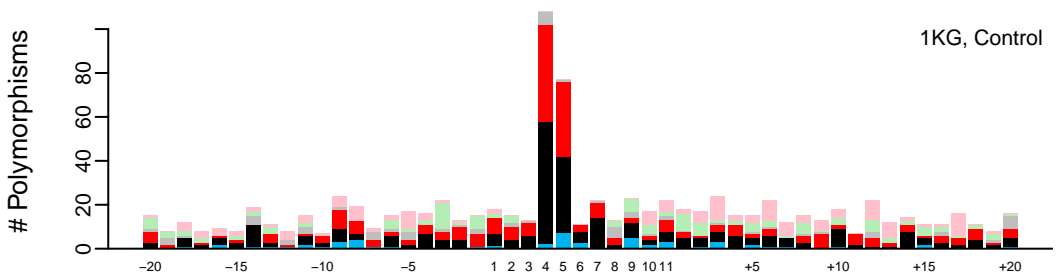

MOTIF POSITION

# E2F6, MA0471.1

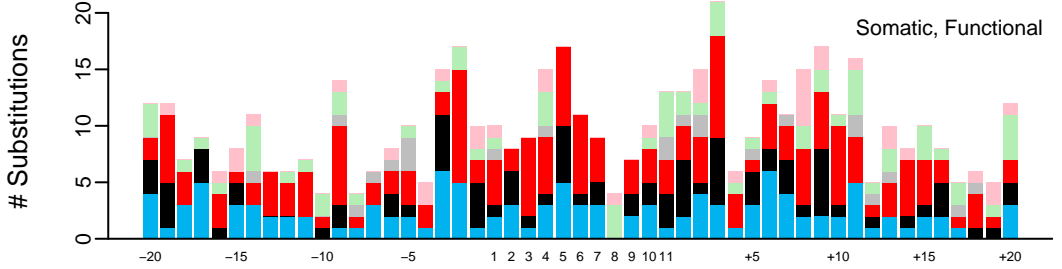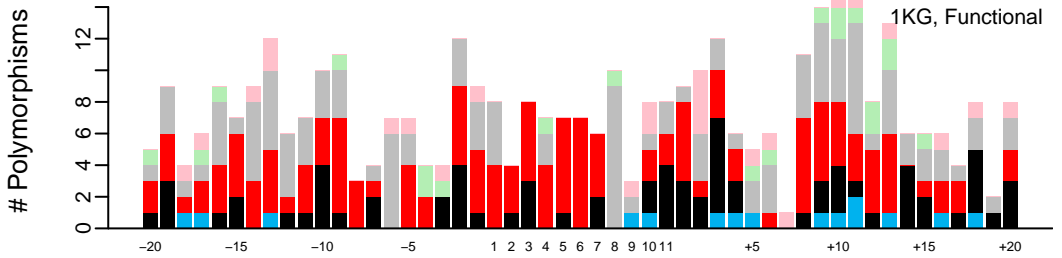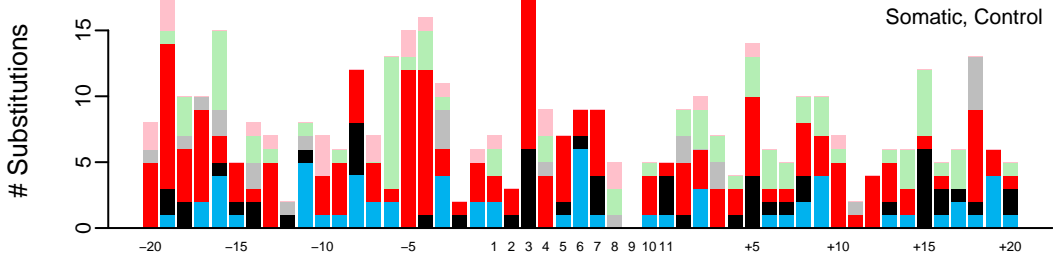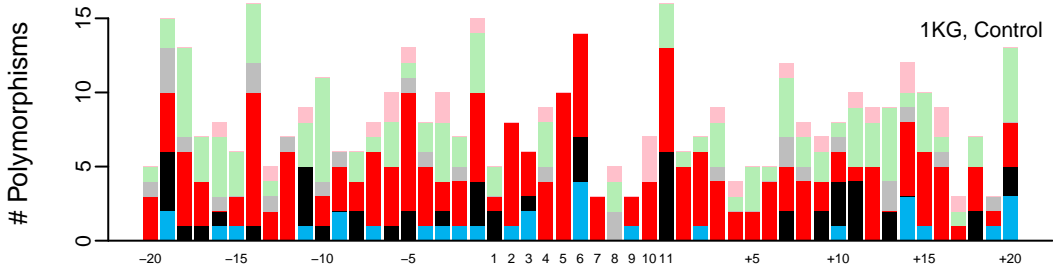

MOTIF POSITION

# ELF1, MA0473.1

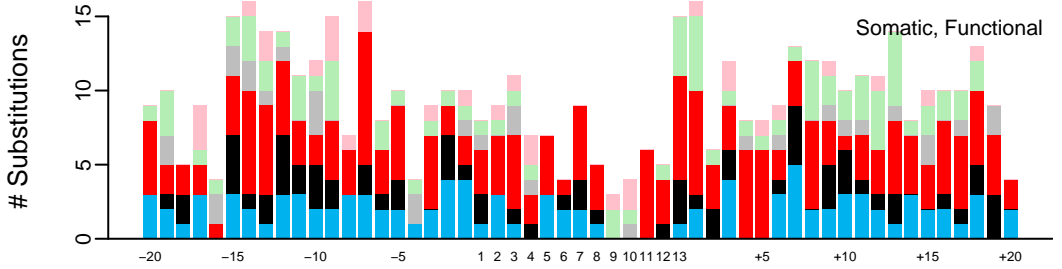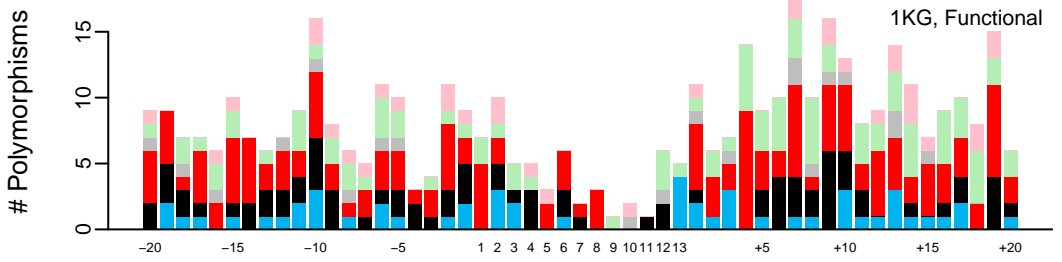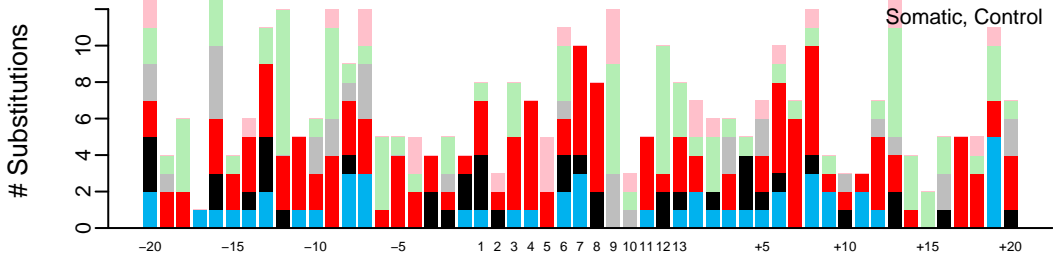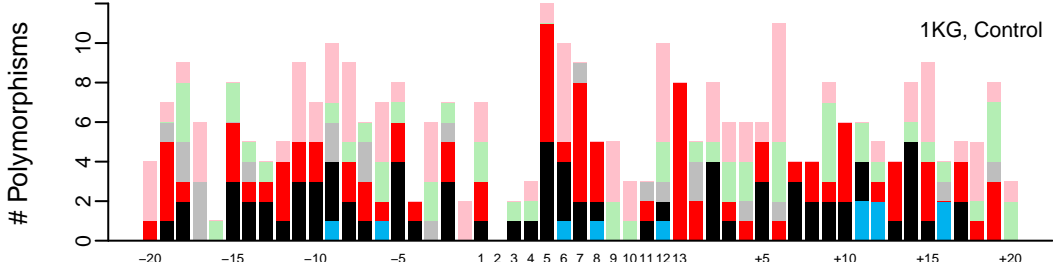

MOTIF POSITION

# FLI1, MA0475.1

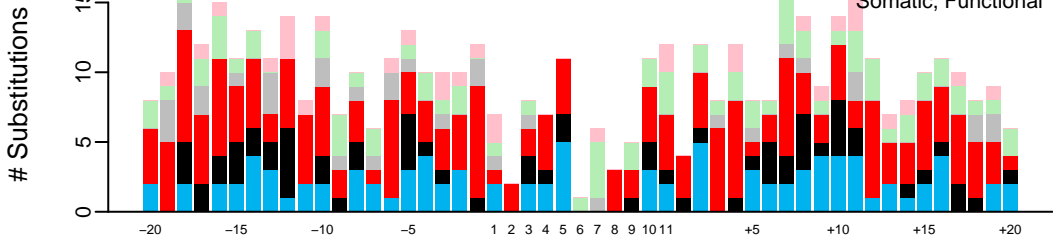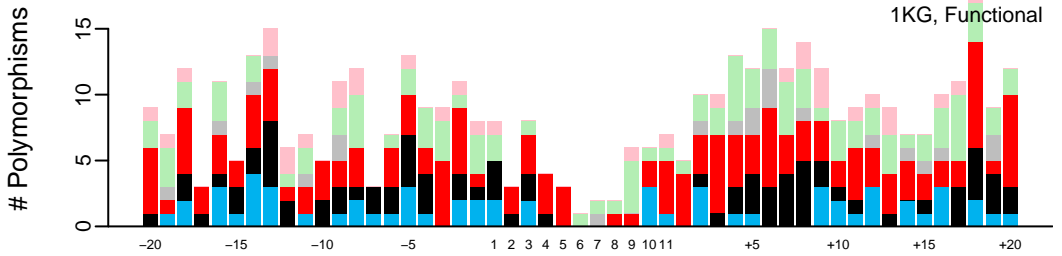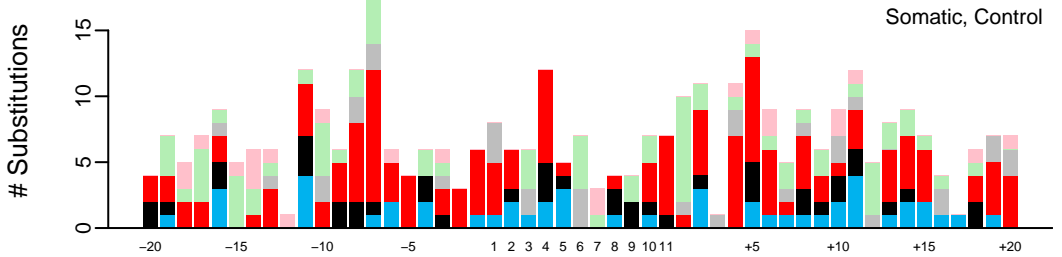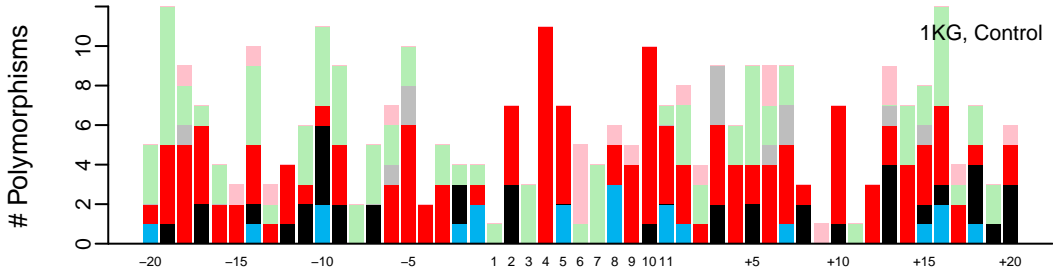



# CFOS, MA0476.1

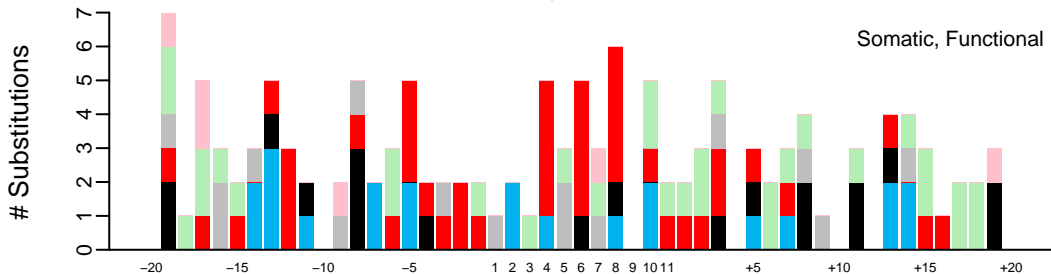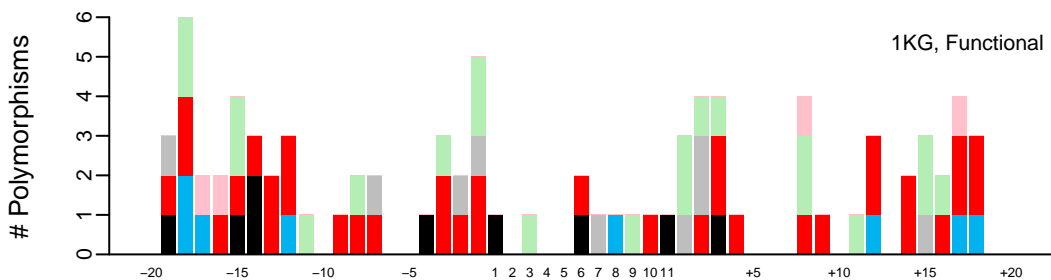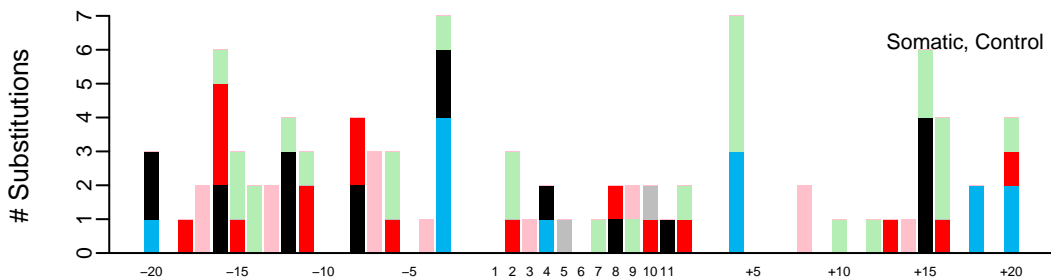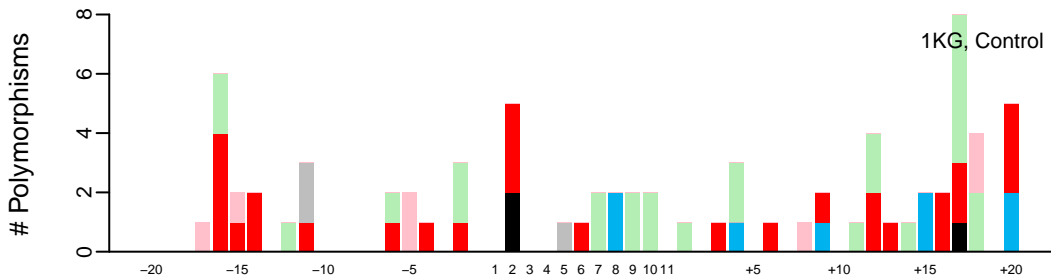

MOTIF POSITION

# FOSL1, MA0477.1

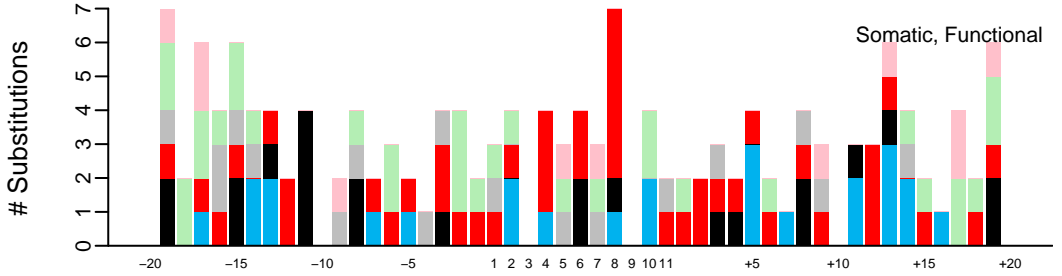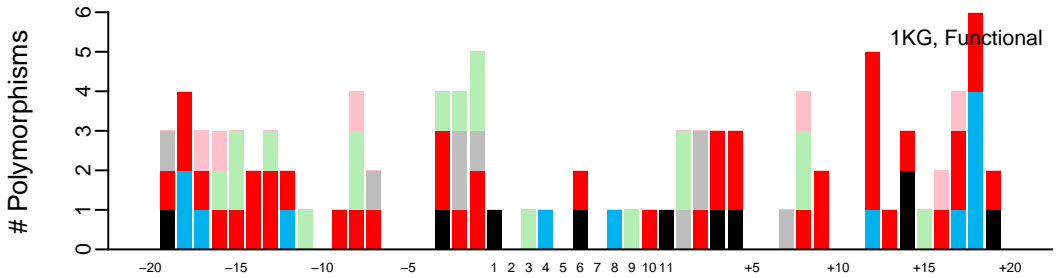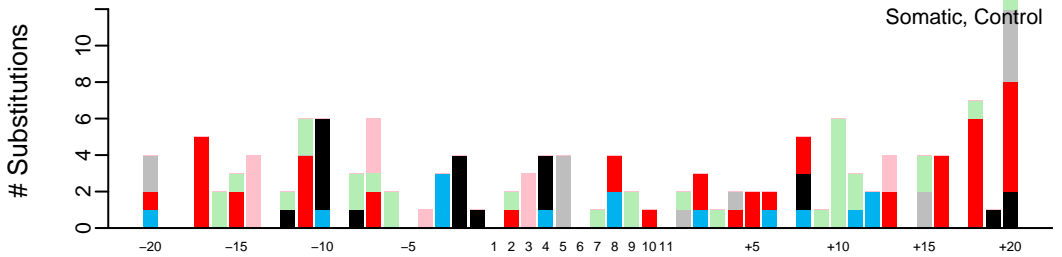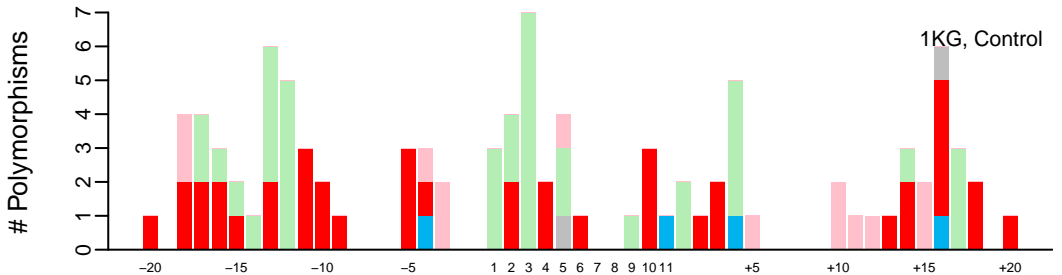

MOTIF POSITION

# FOSL2, MA0478.1

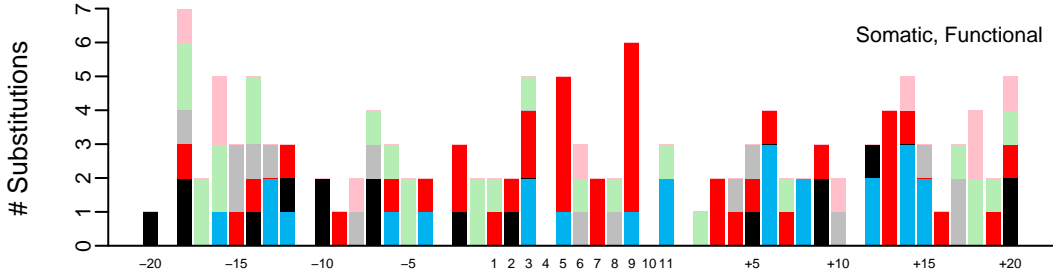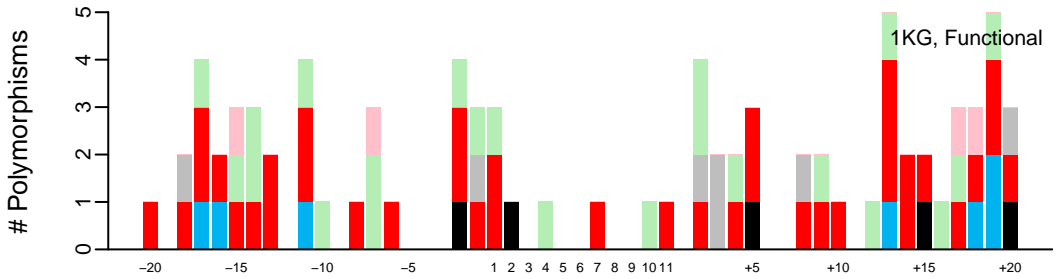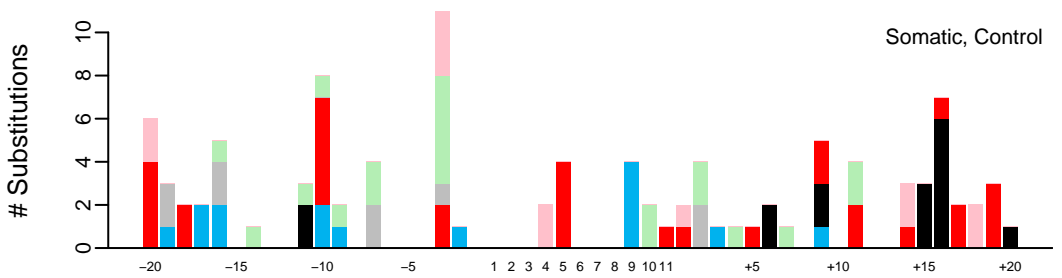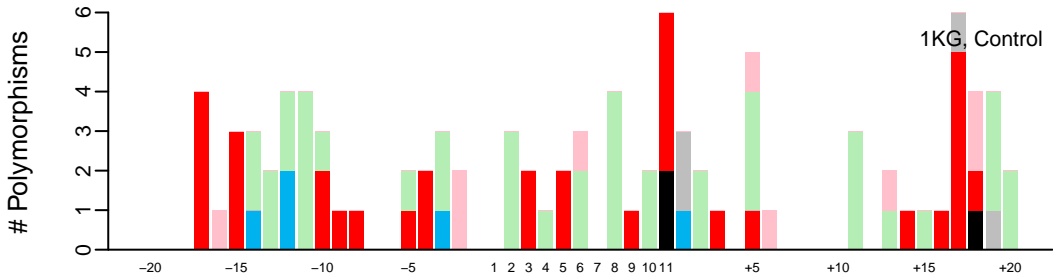

MOTIF POSITION

# FOXH1, MA0479.1

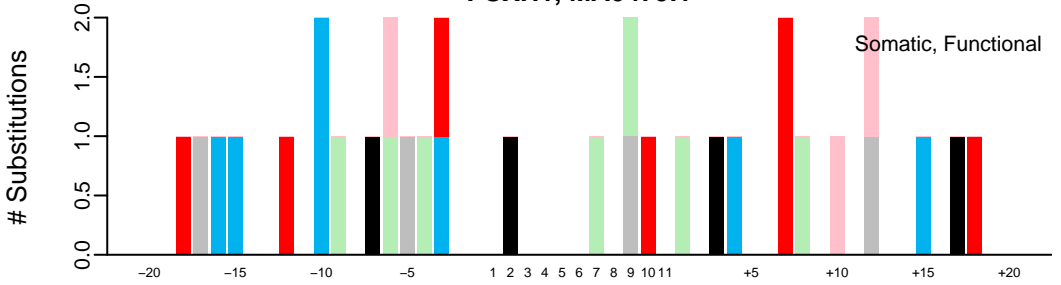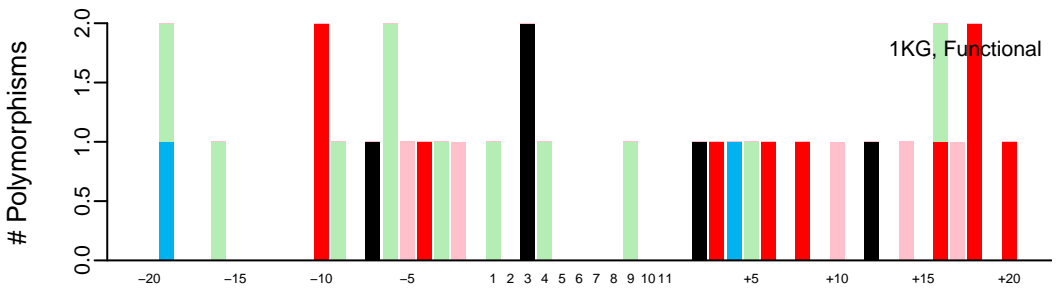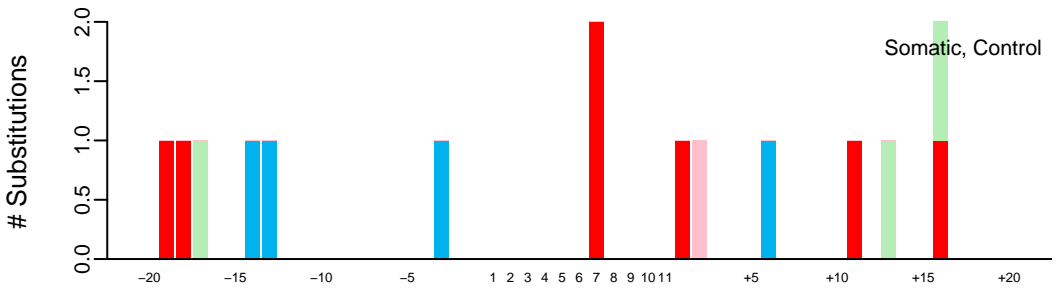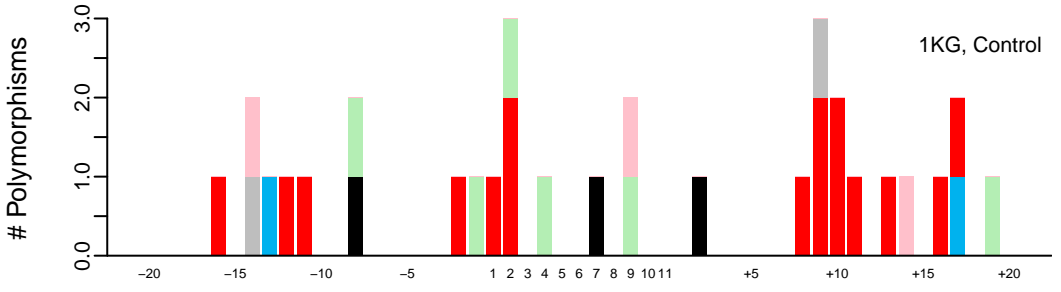

MOTIF POSITION

# FOXP1, MA0481.1

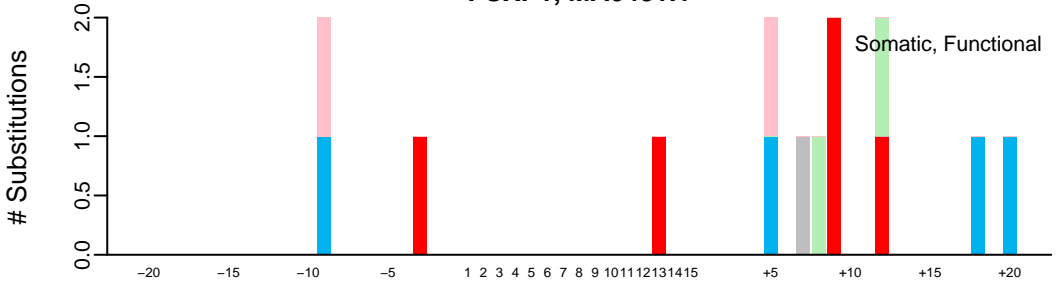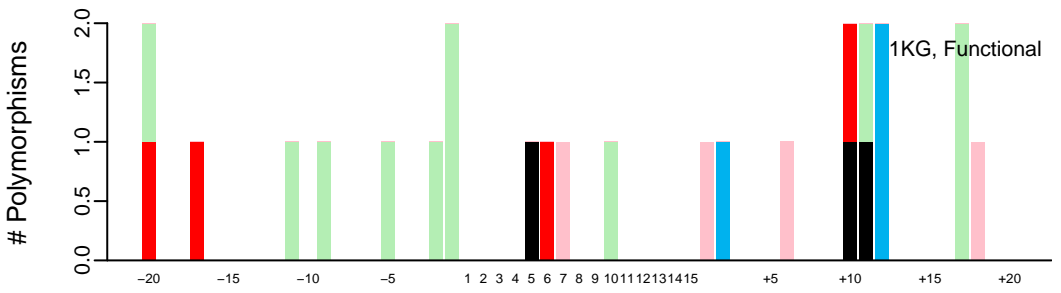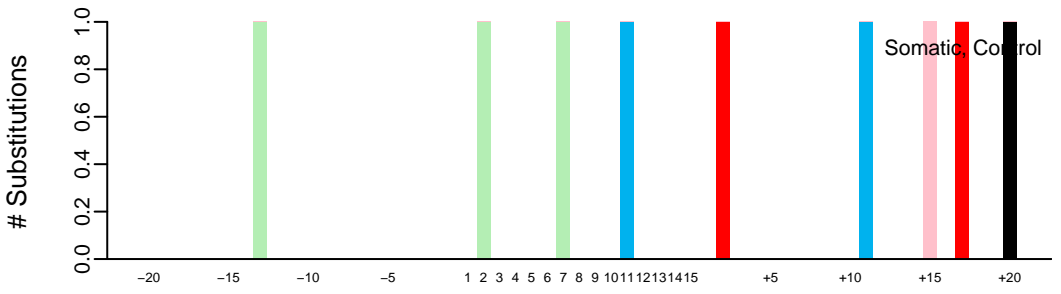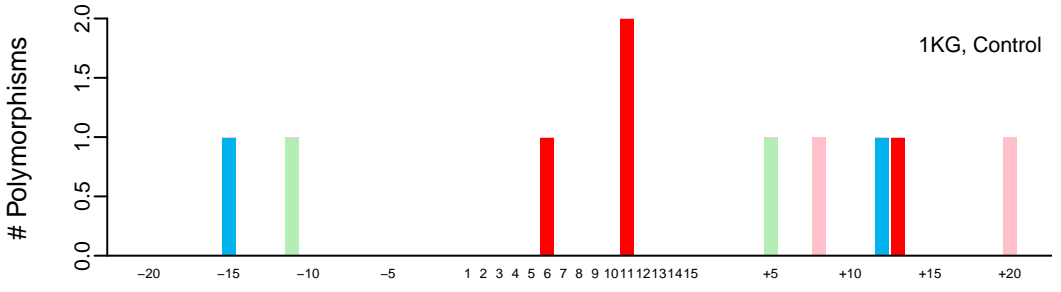

MOTIF POSITION

# HNF4G, MA0484.1

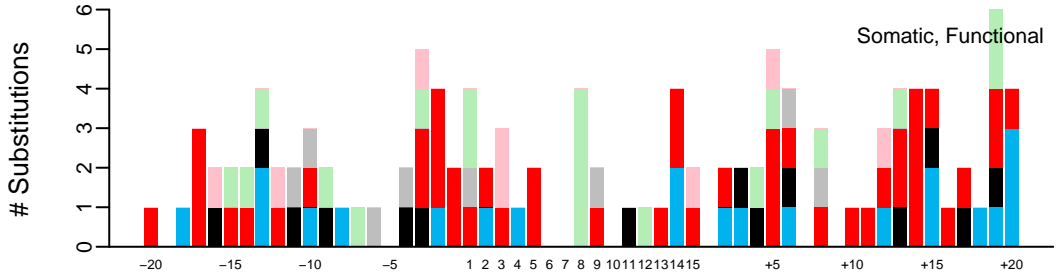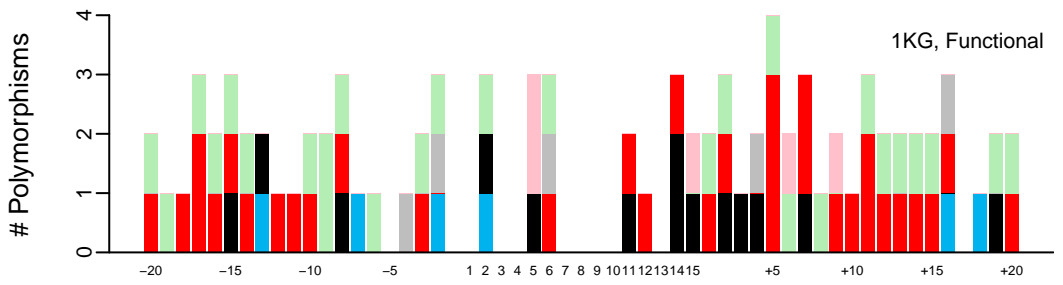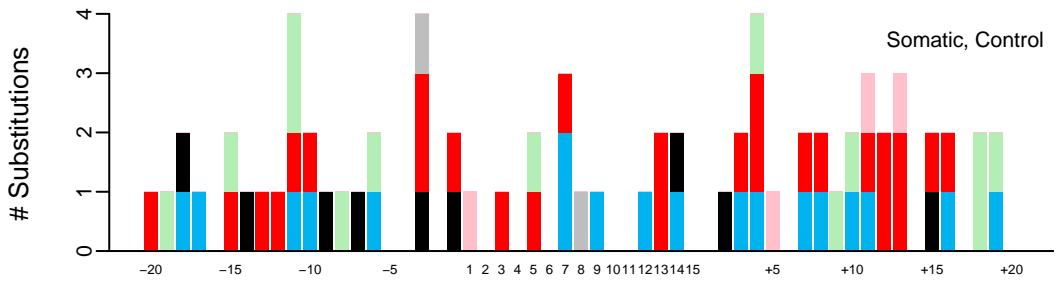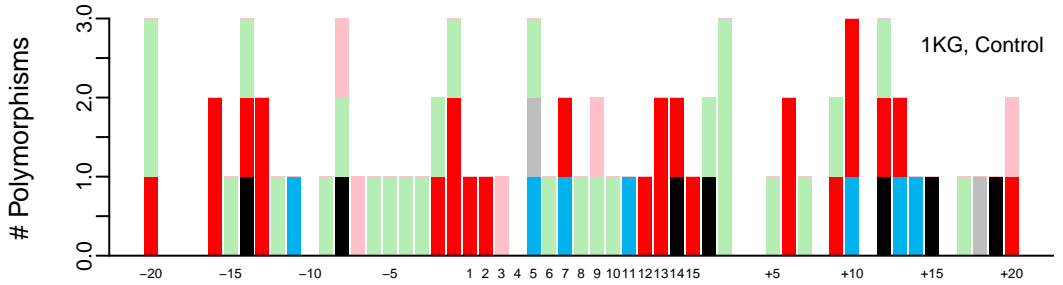

MOTIF POSITION

# HSF1, MA0486.1

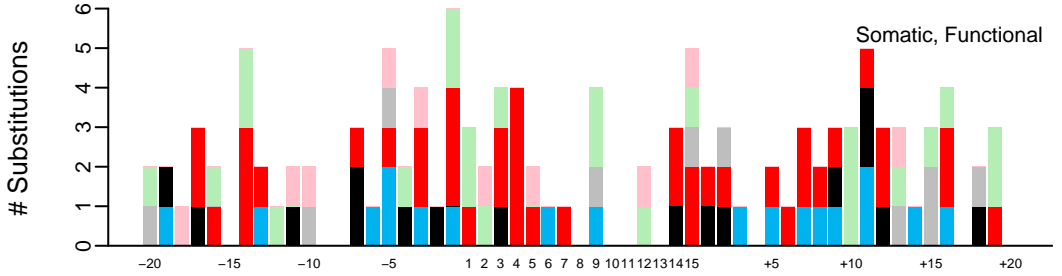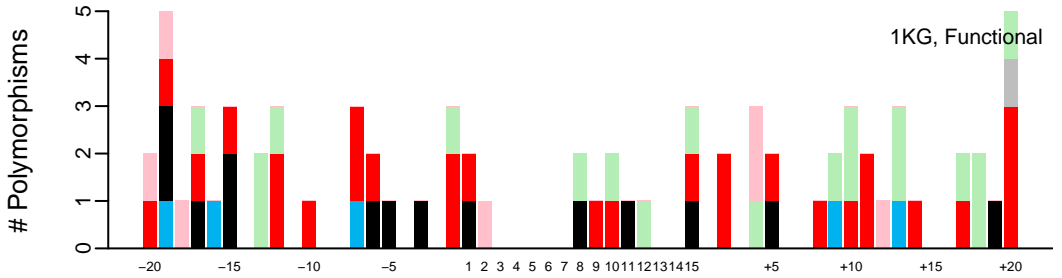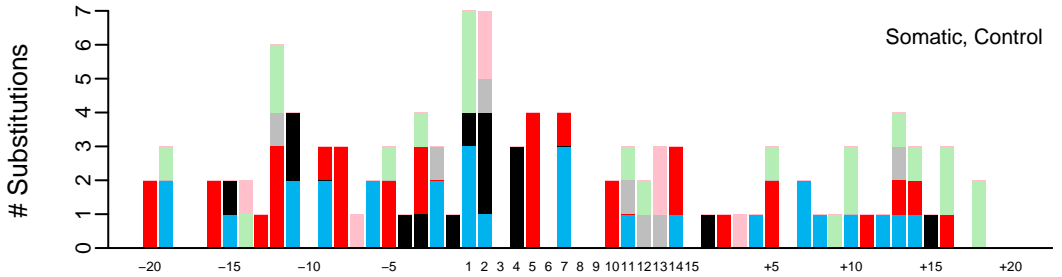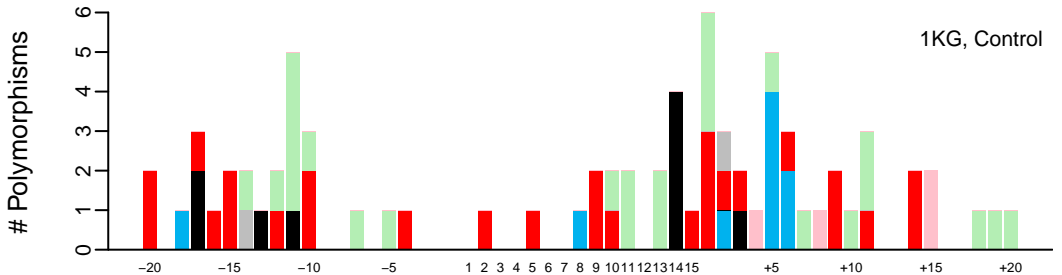

MOTIF POSITION

### CJUN, MA0488.1

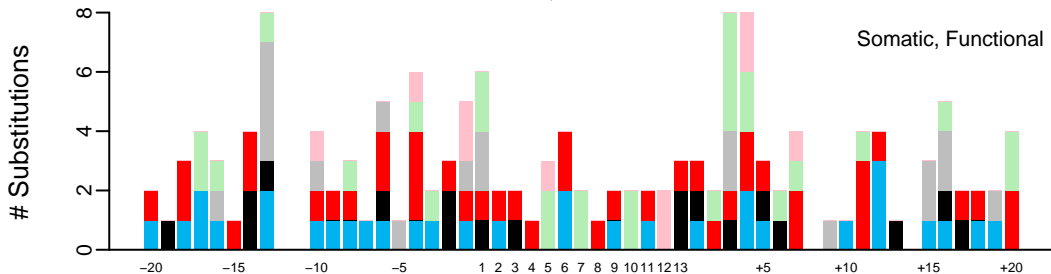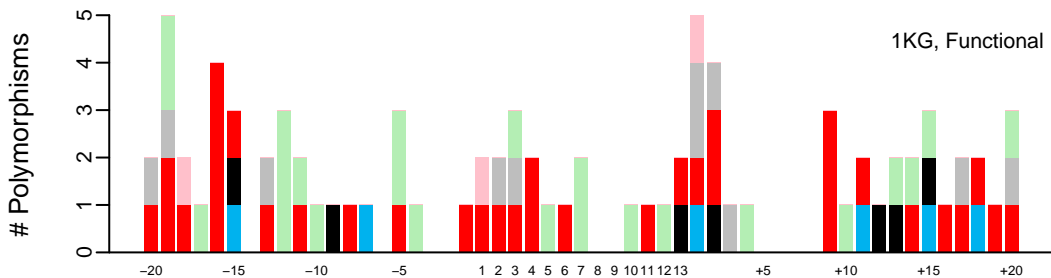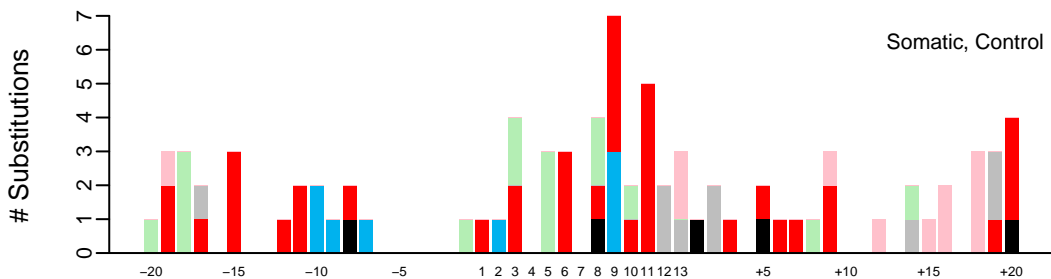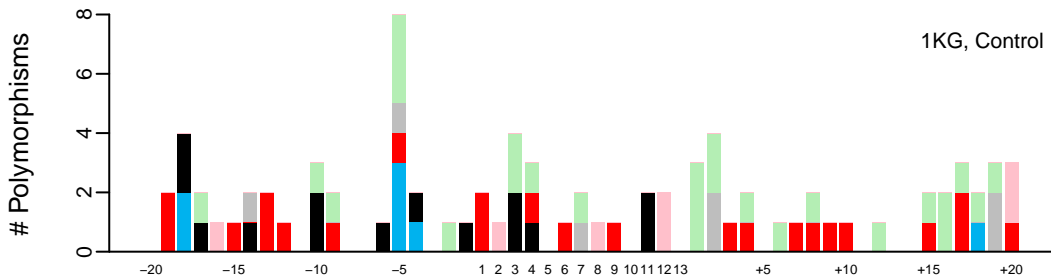

MOTIF POSITION



# CJUN, MA0489.1

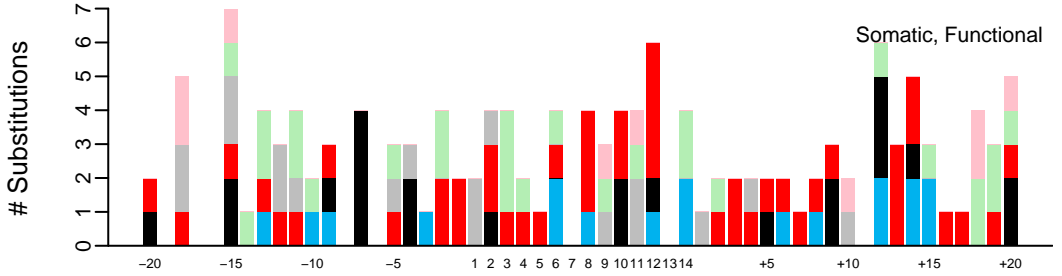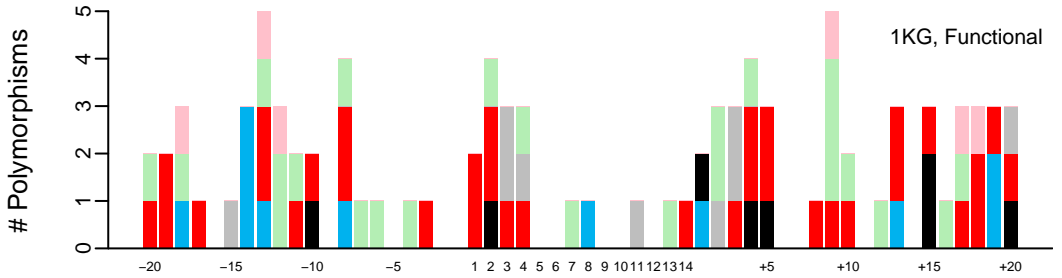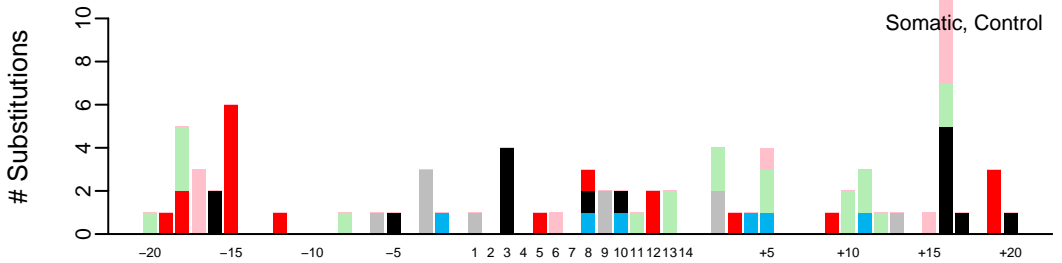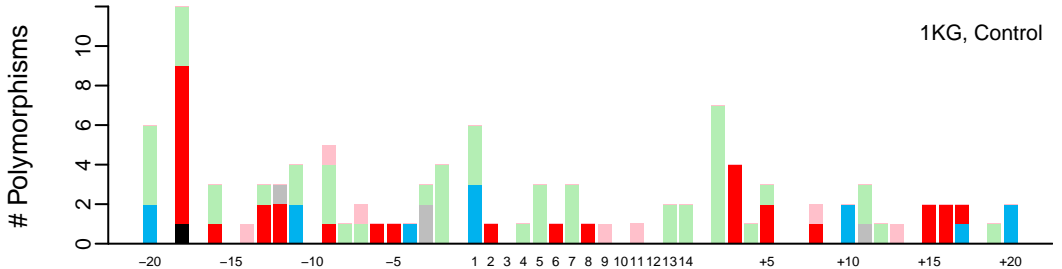

MOTIF POSITION

# JUNB, MA0490.1

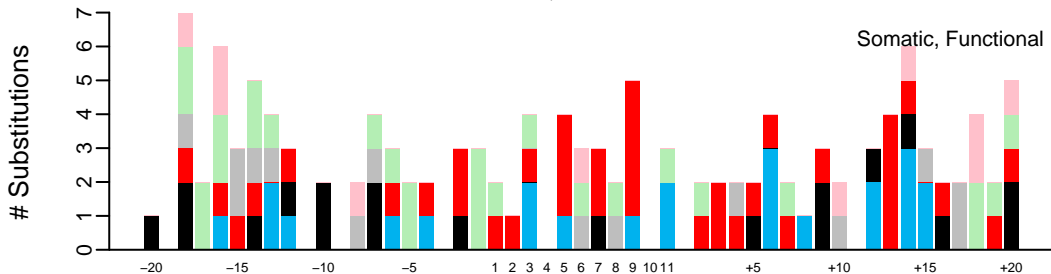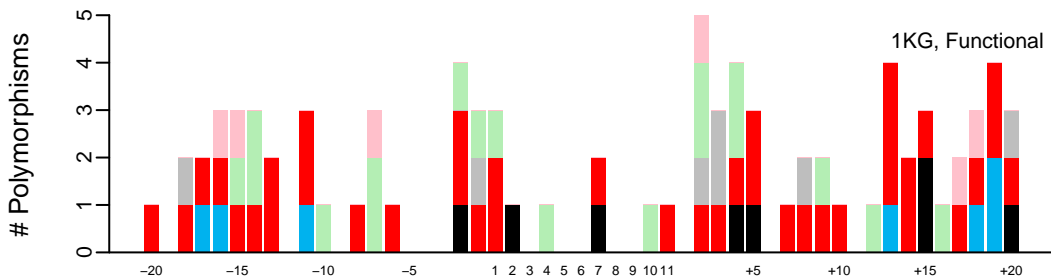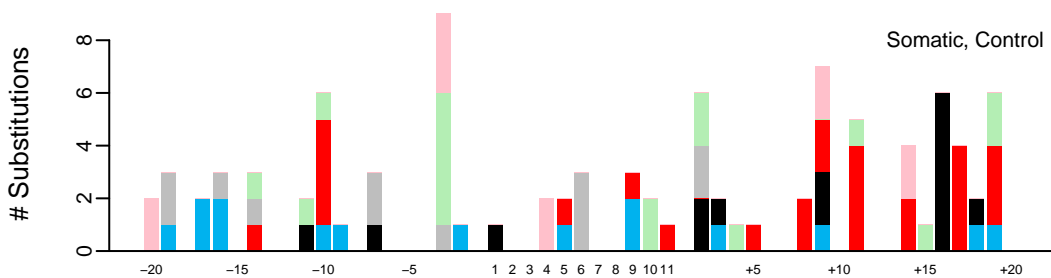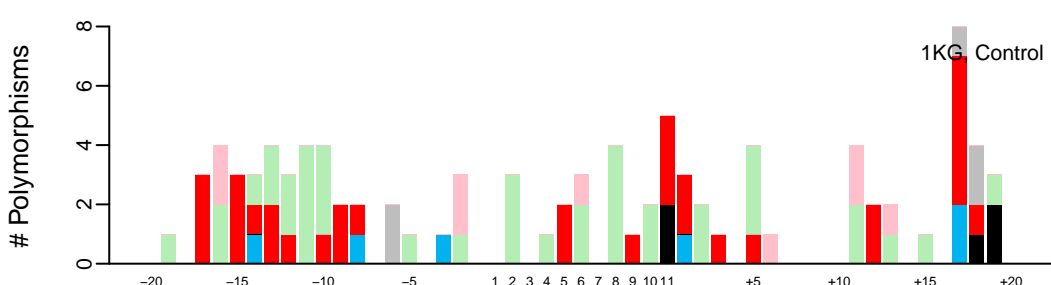

MOTIF POSITION

# JUND, MA0491.1

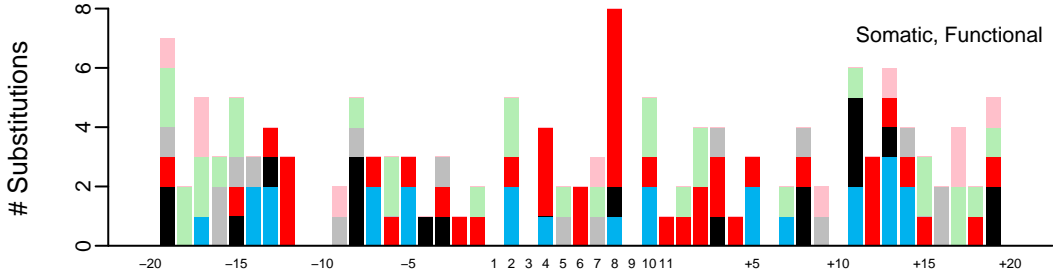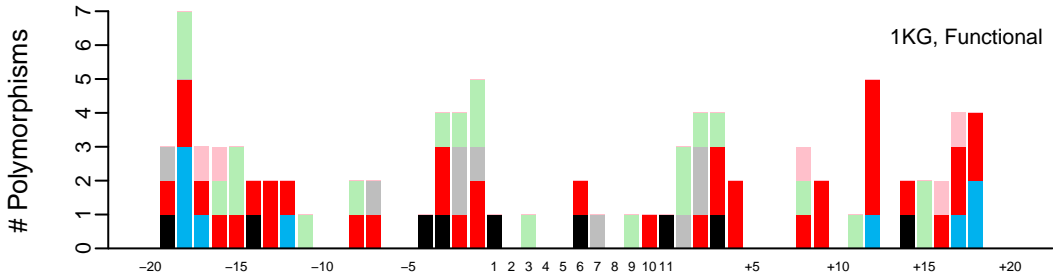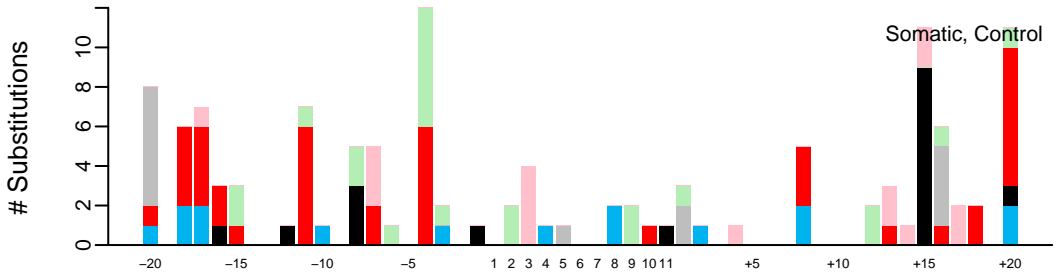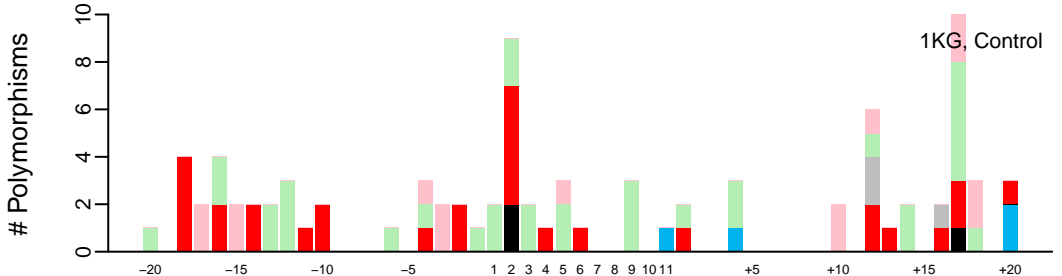

MOTIF POSITION

# JUND, MA0492.1

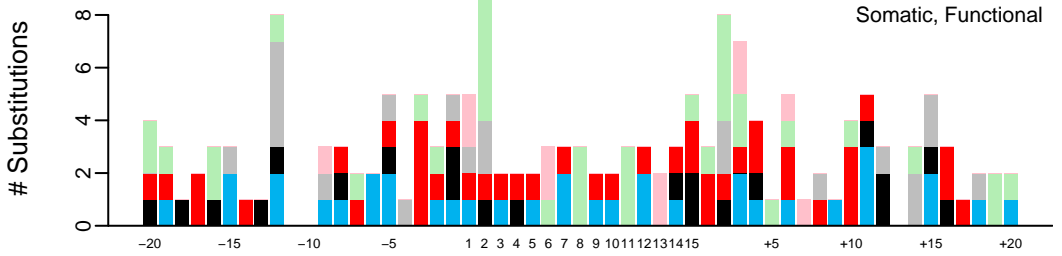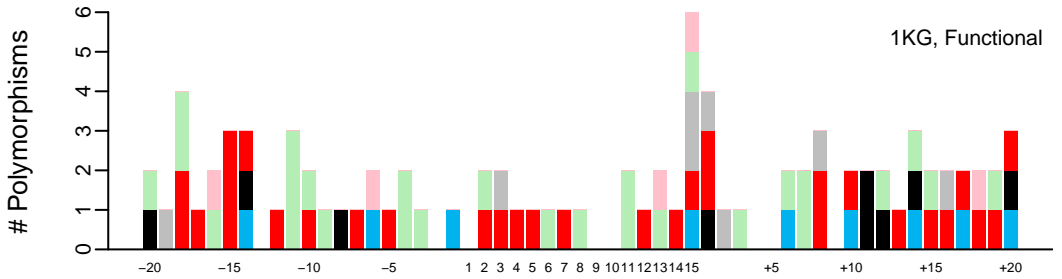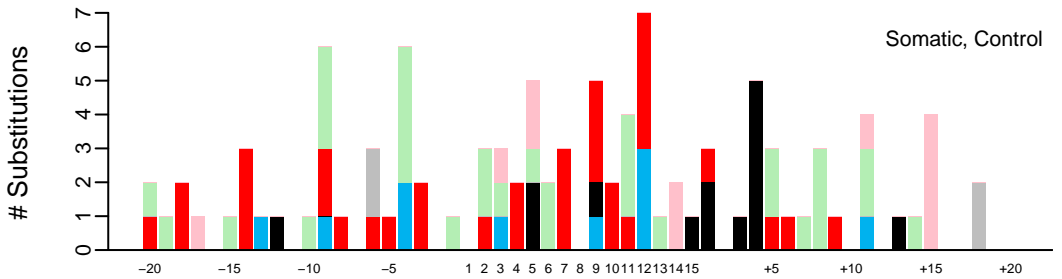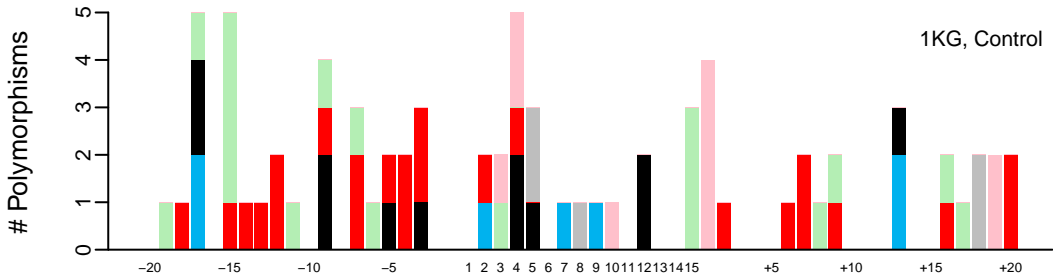

MOTIF POSITION

# MAFF, MA0495.1

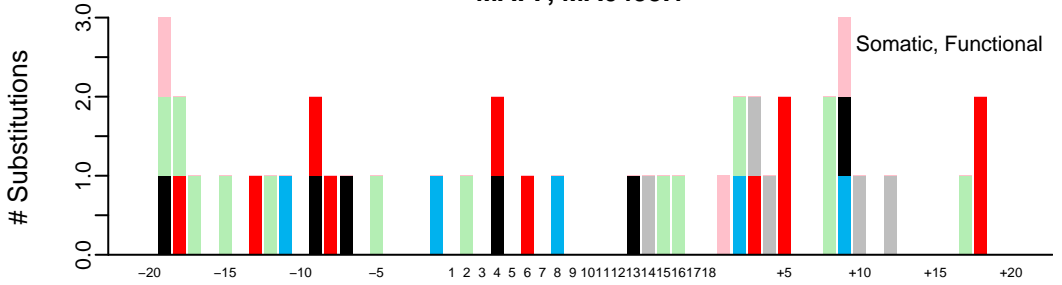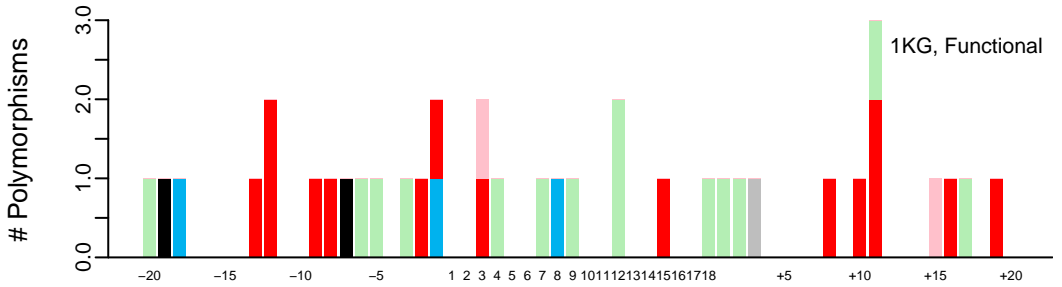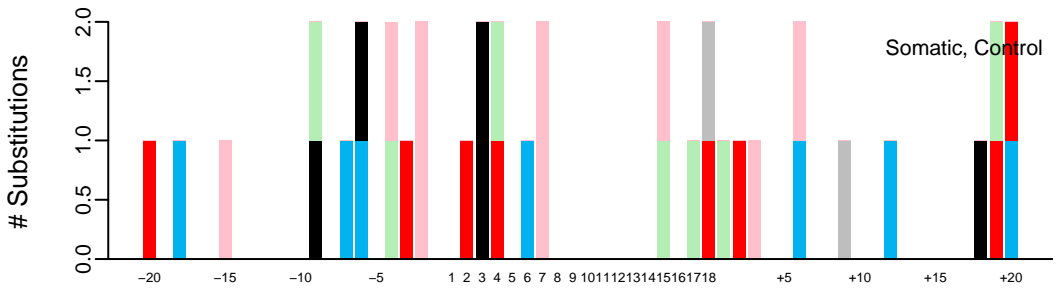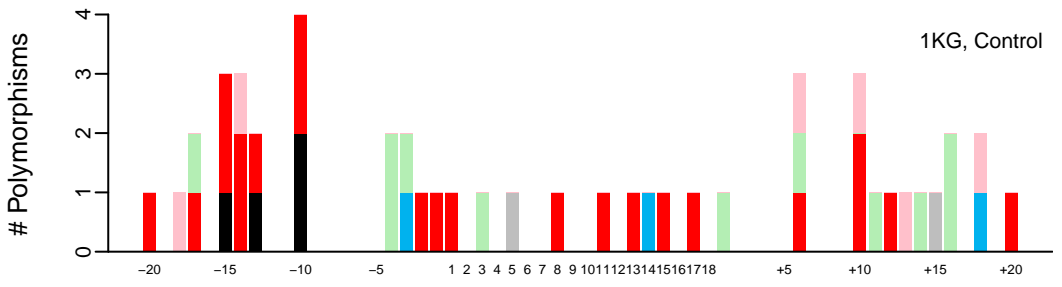

MOTIF POSITION

# MAFK, MA0496.1

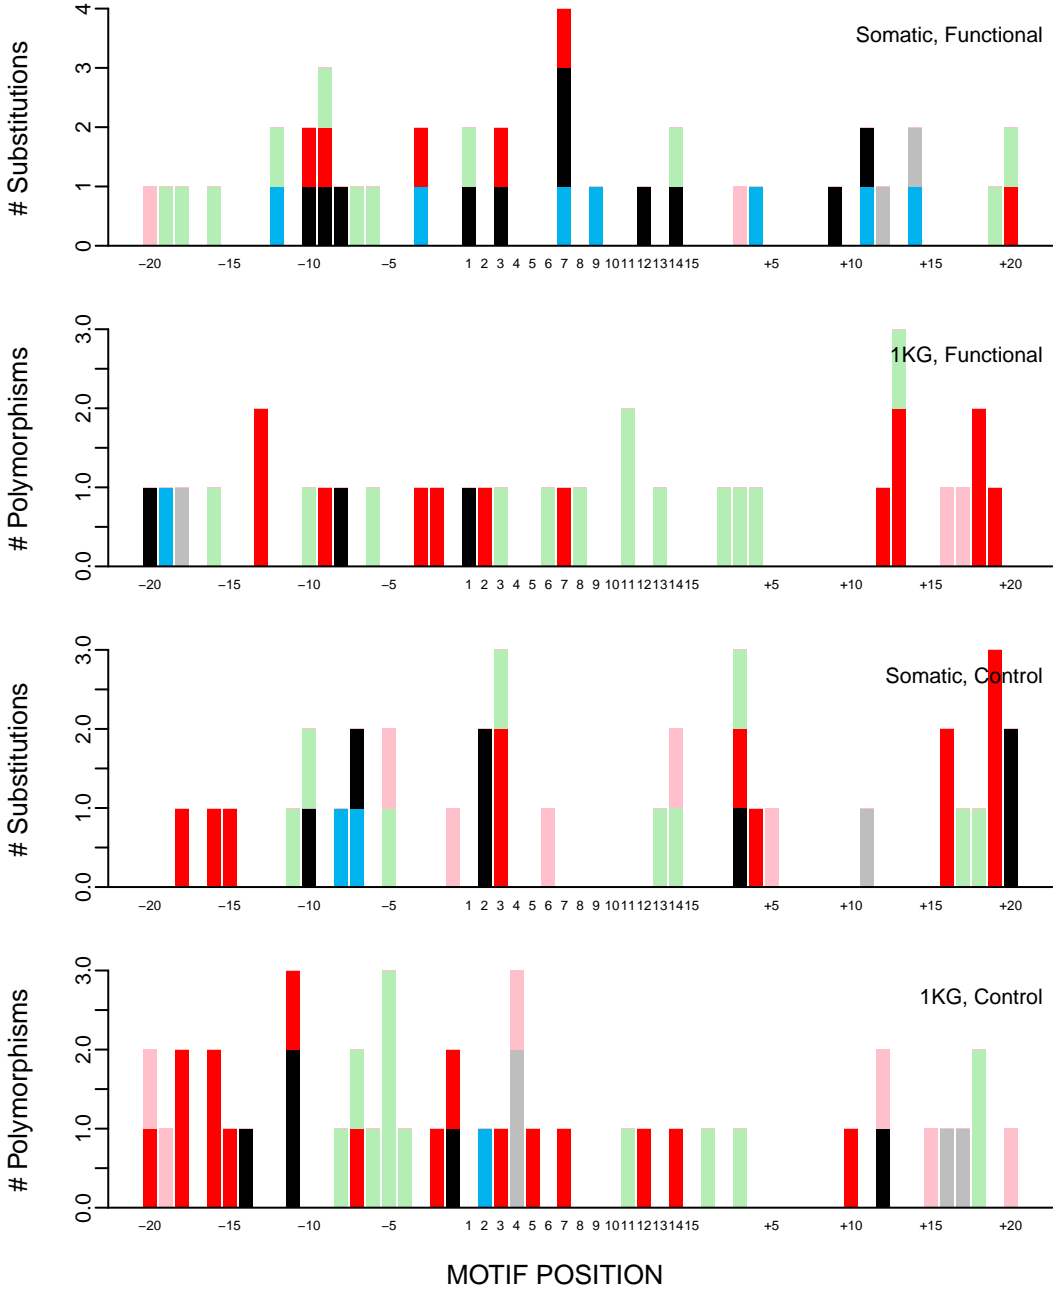

# MEF2C, MA0497.1

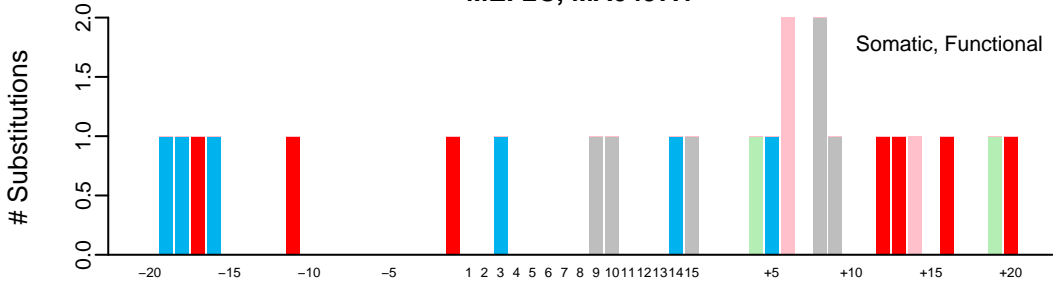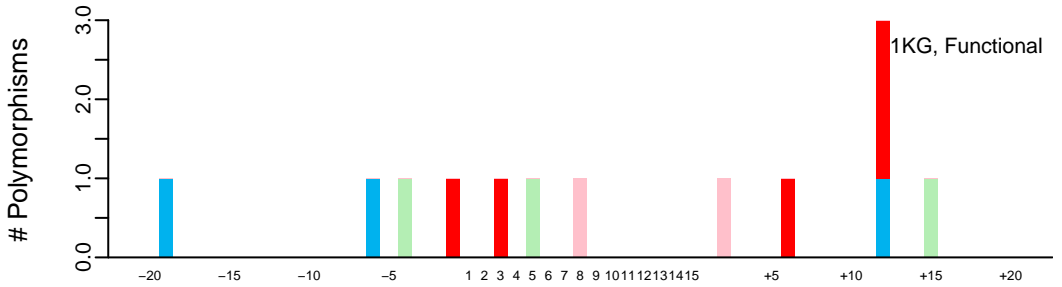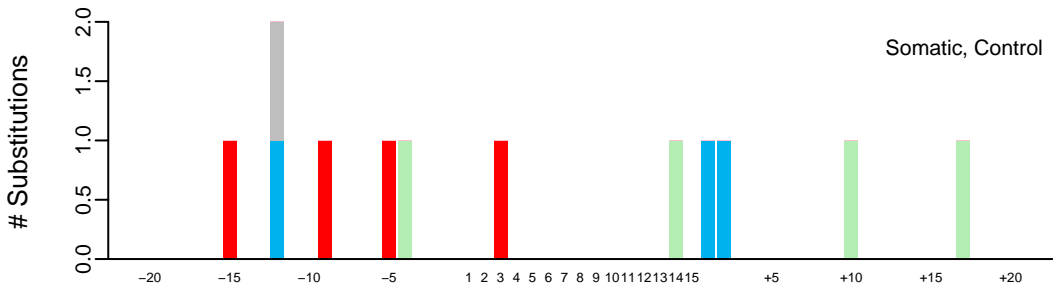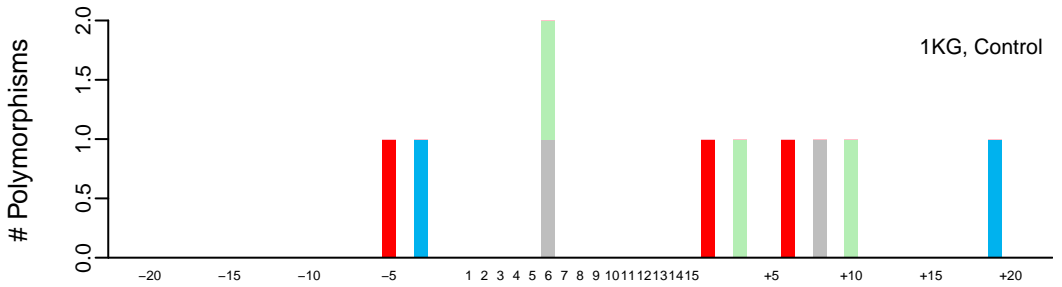

MOTIF POSITION

# NFE2::MAF, MA0501.1

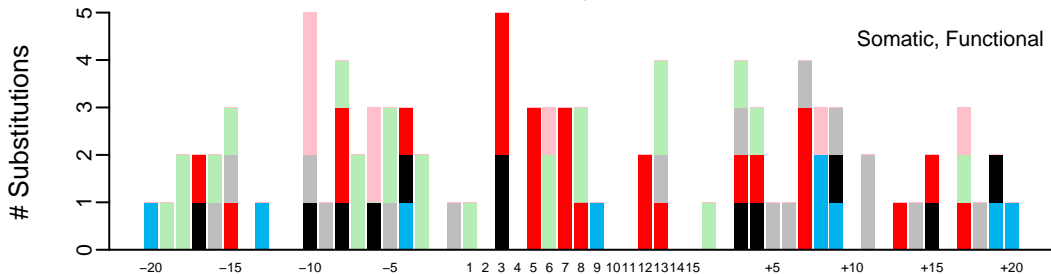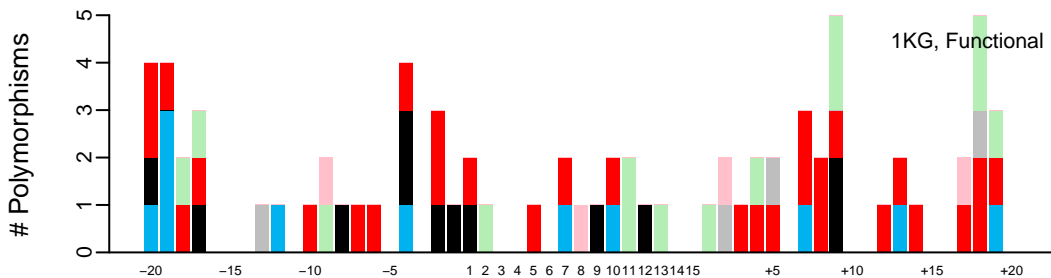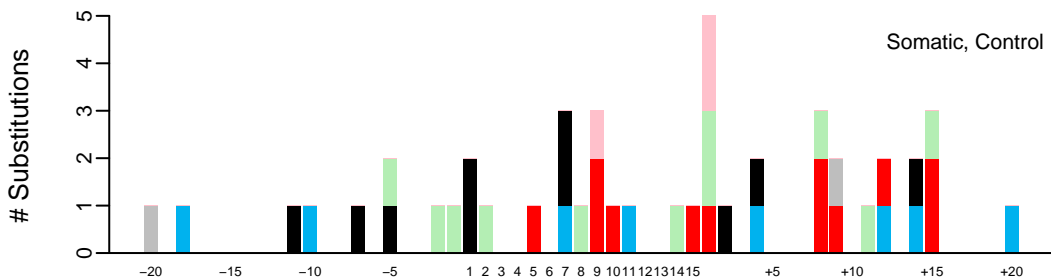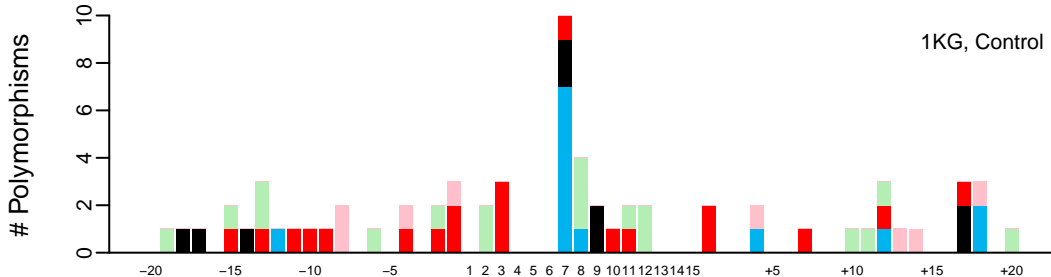

MOTIF POSITION



# NFYB, MA0502.1

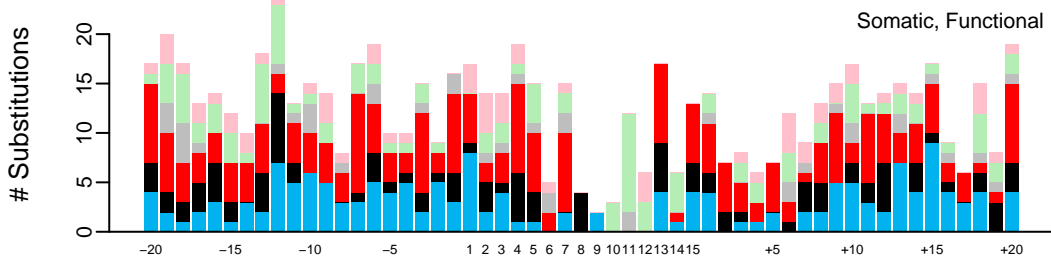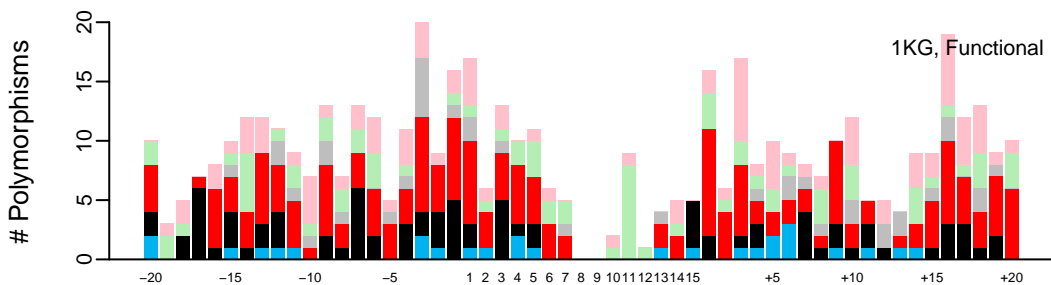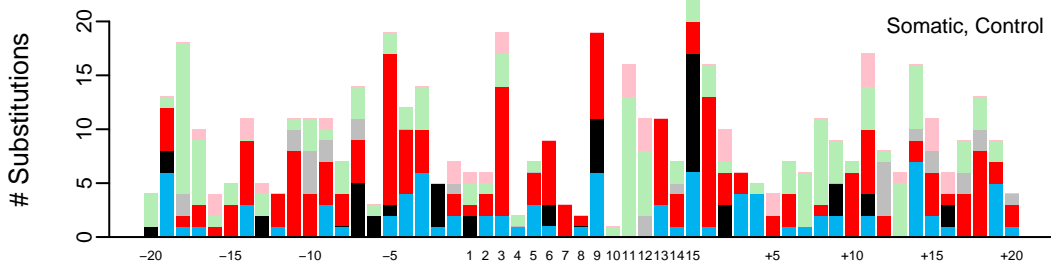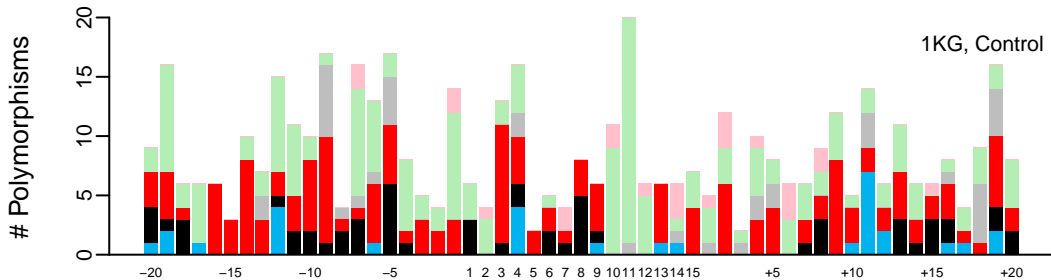

MOTIF POSITION

# TR4, MA0504.1

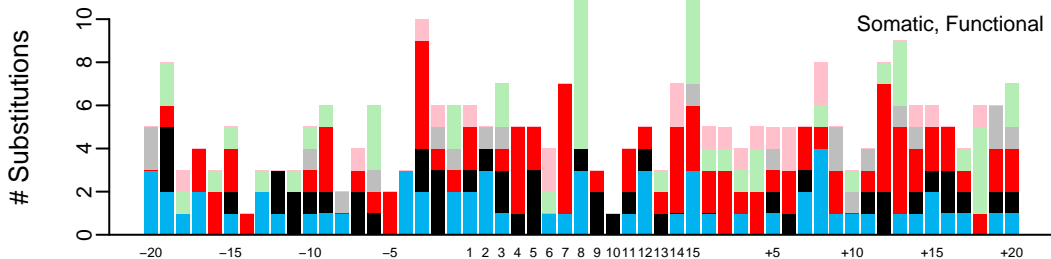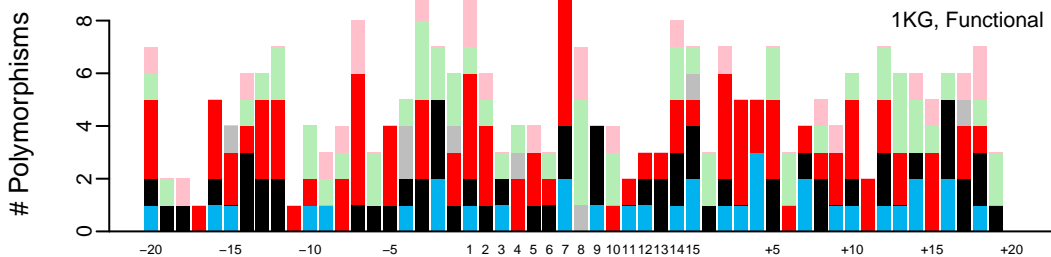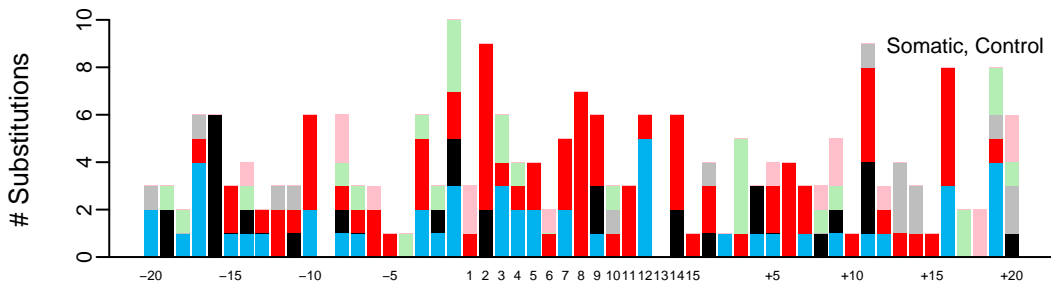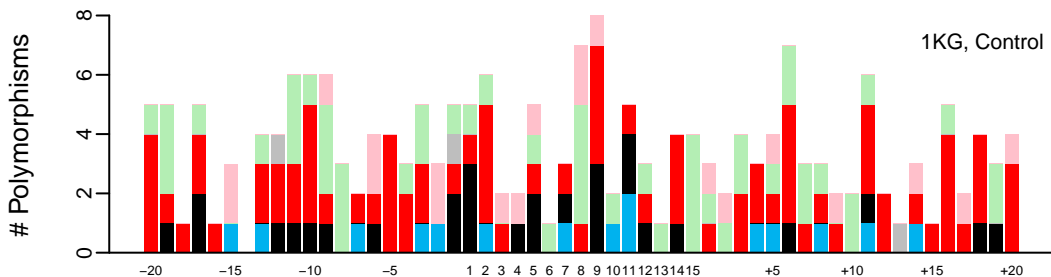

MOTIF POSITION

# NRF1, MA0506.1

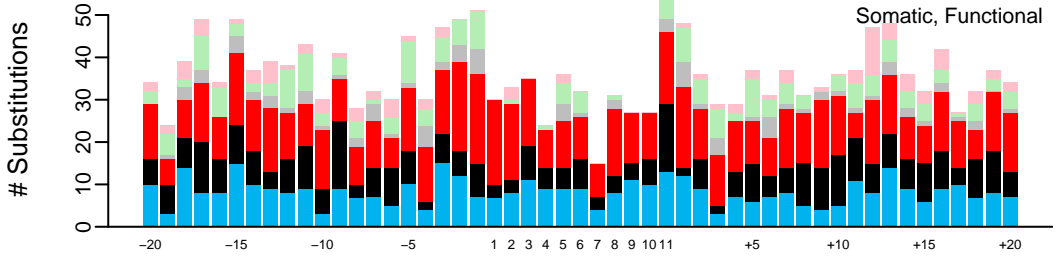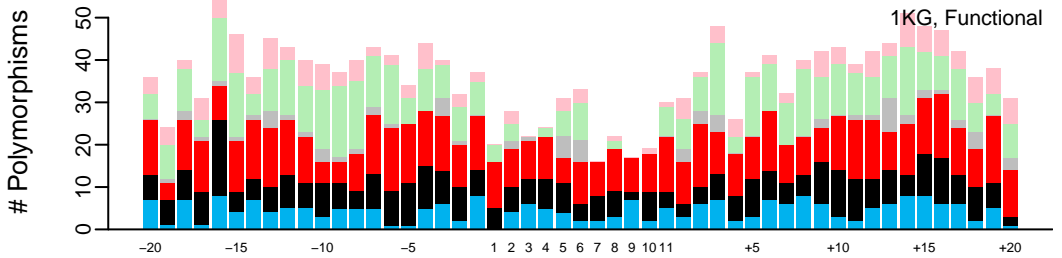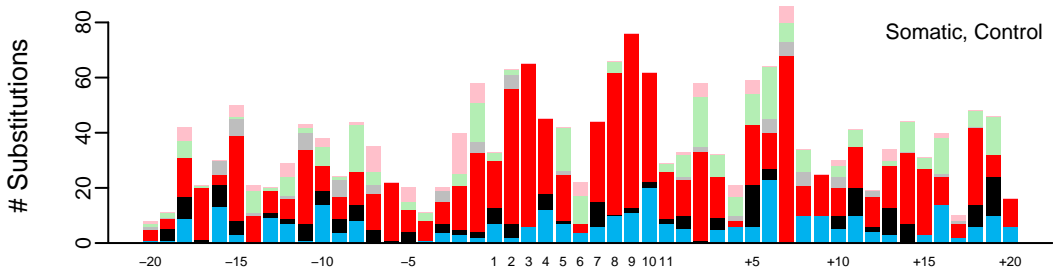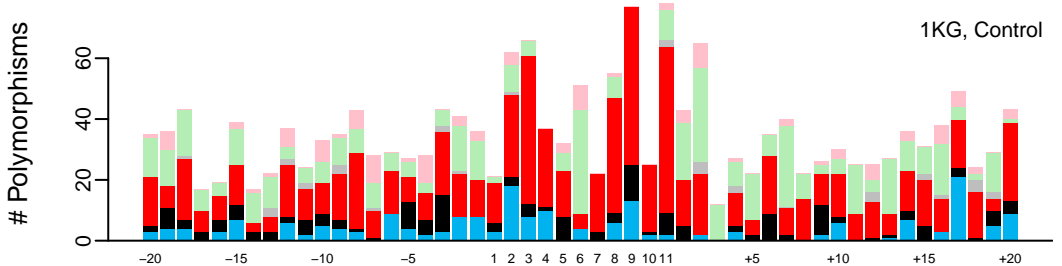

MOTIF POSITION

# POU2F2, MA0507.1

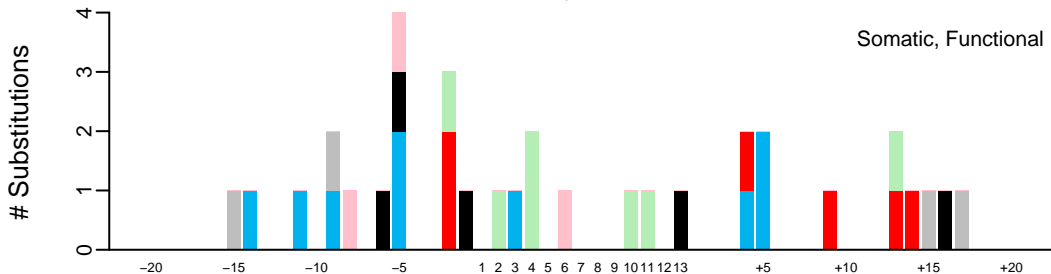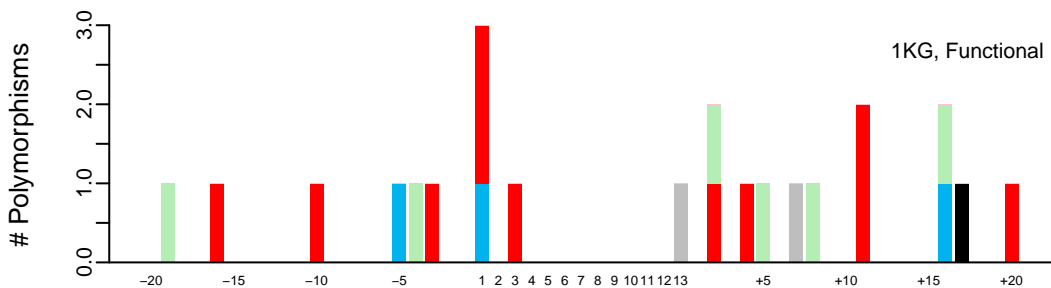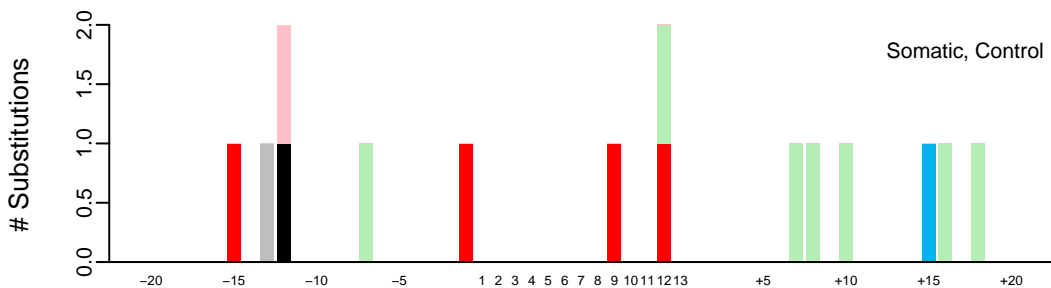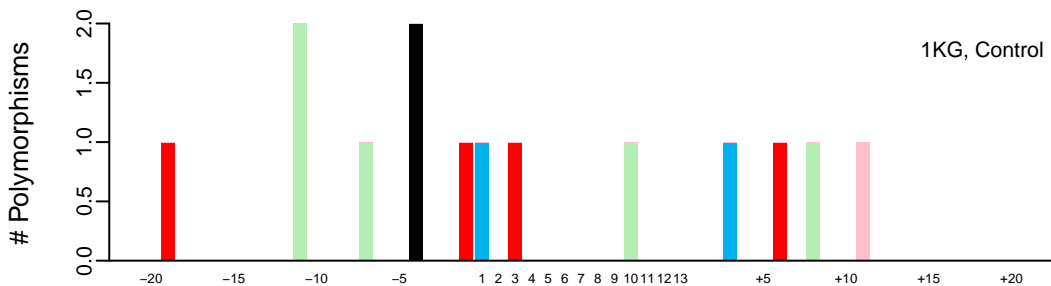

MOTIF POSITION

# PRDM1, MA0508.1

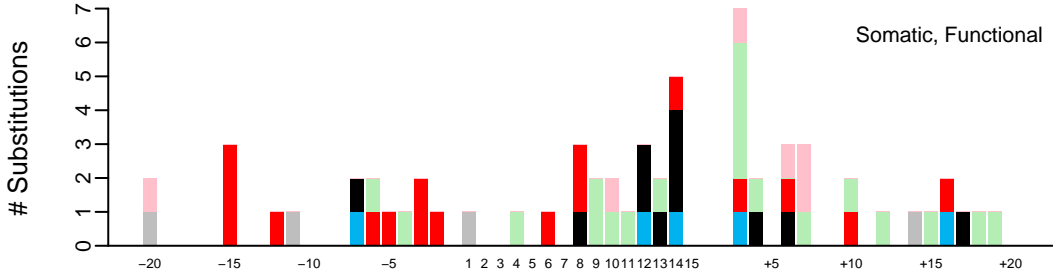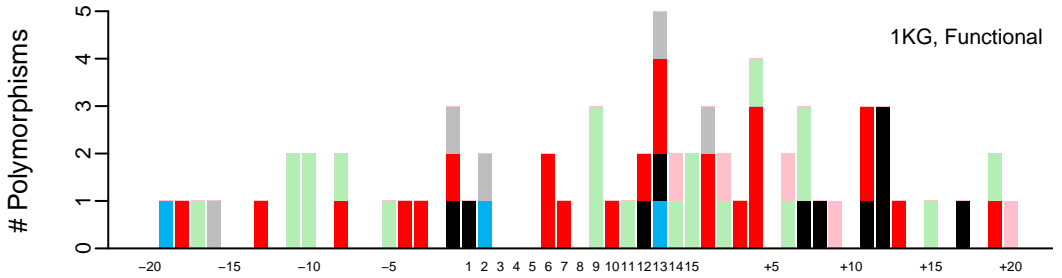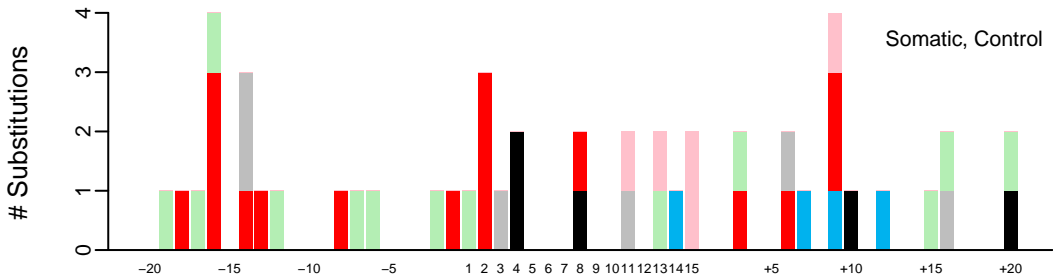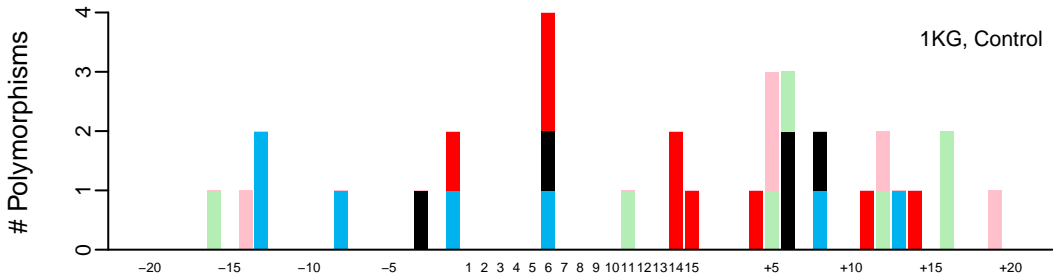

MOTIF POSITION

# RFX5, MA0510.1

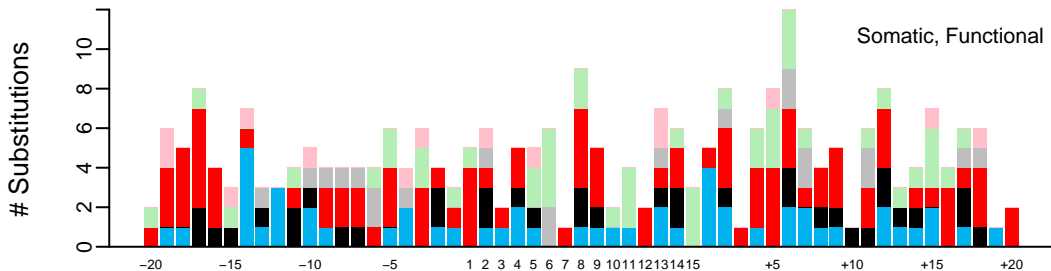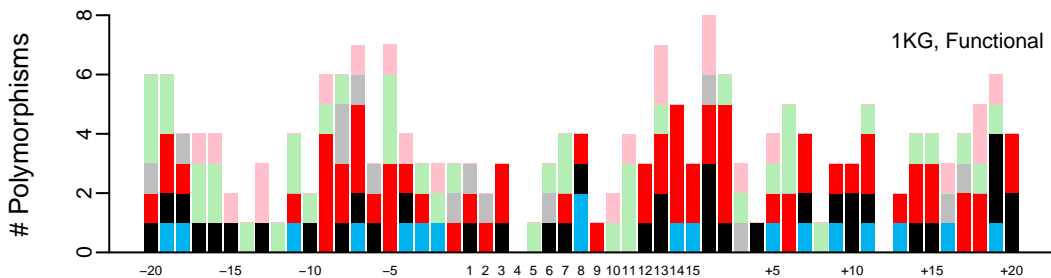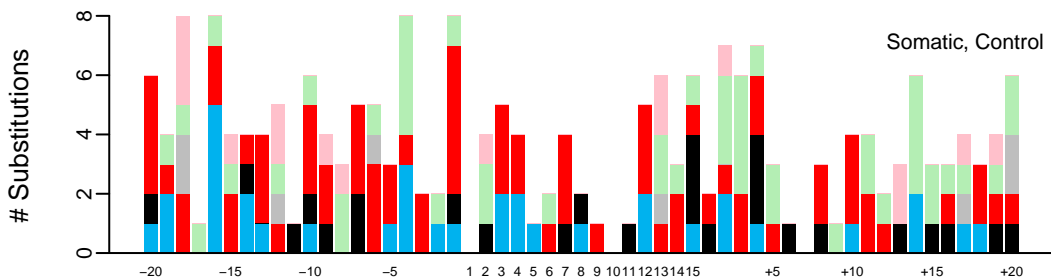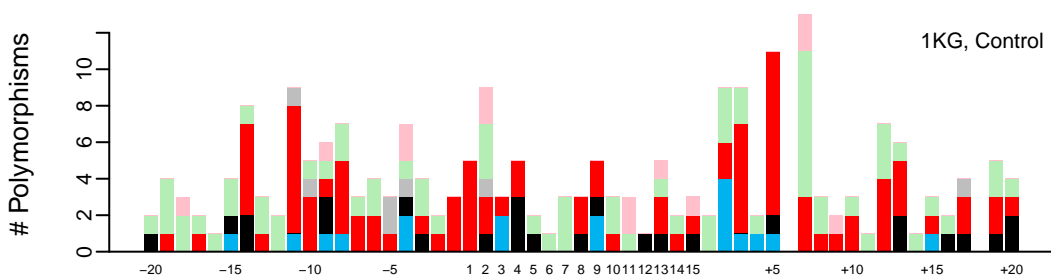

MOTIF POSITION

# RUNX2, MA0511.1

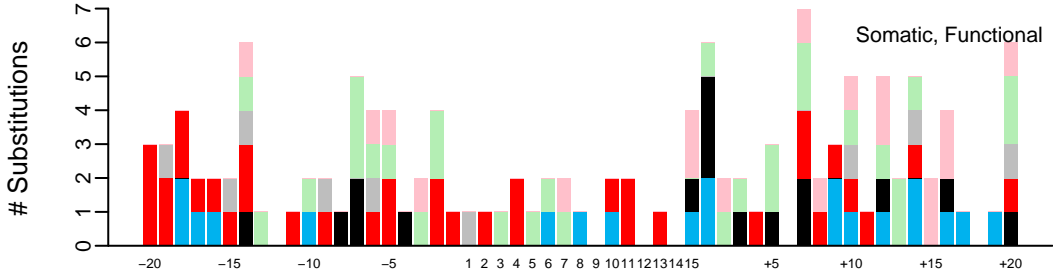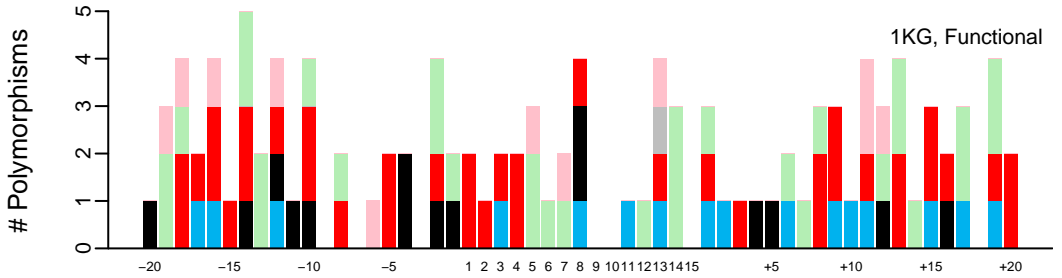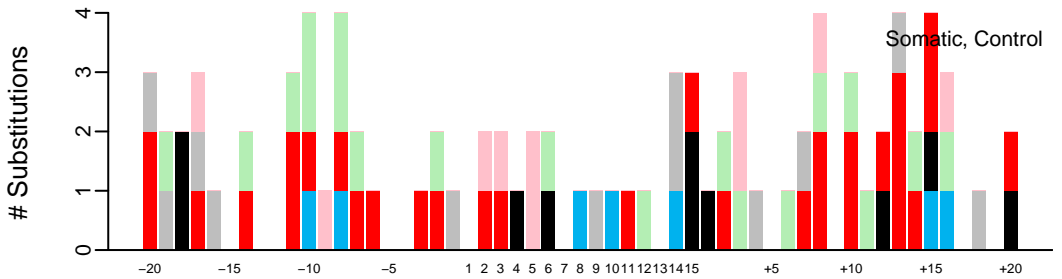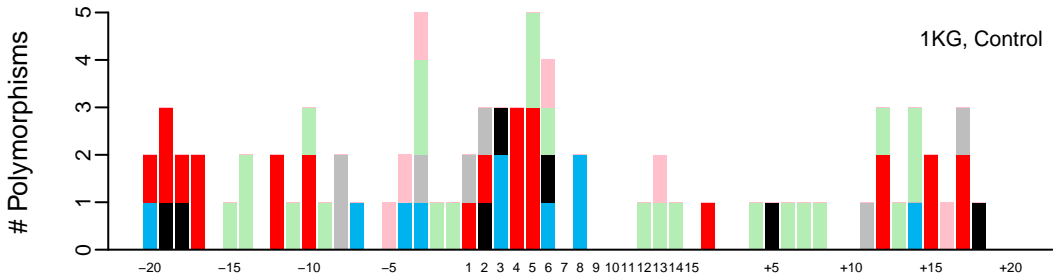

MOTIF POSITION

# SMAD2::SMAD3::SMAD4, MA0513.1

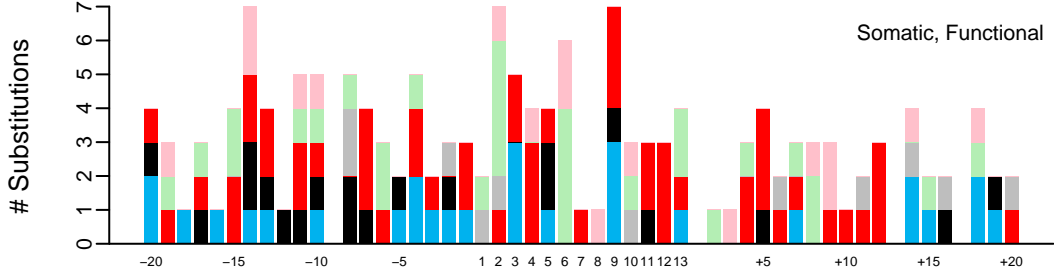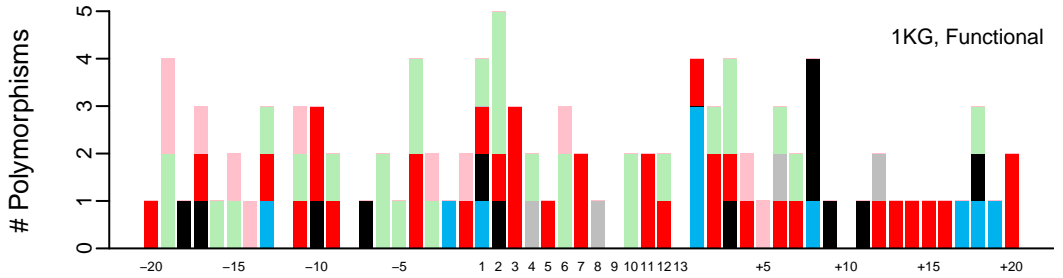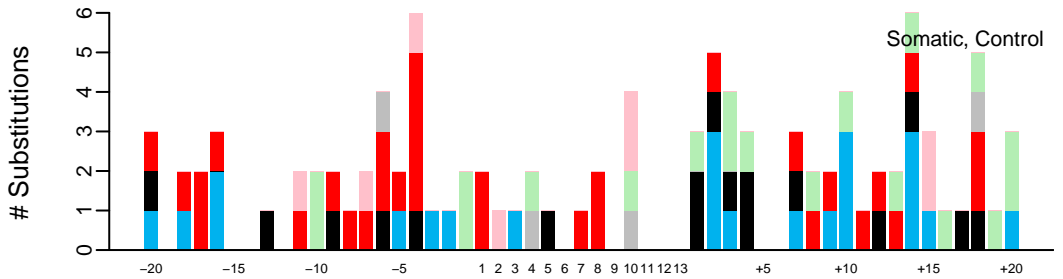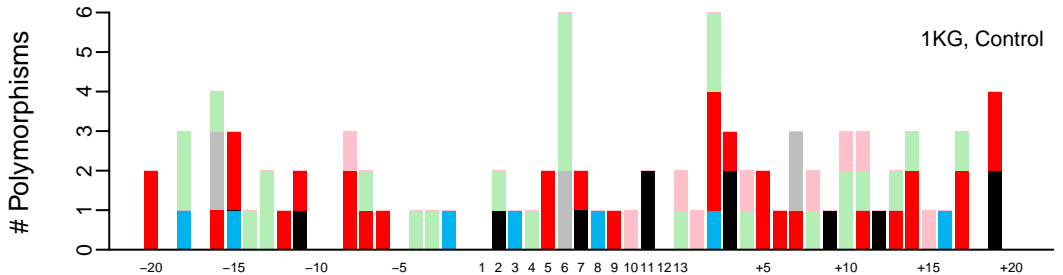

MOTIF POSITION



# SP2, MA0516.1

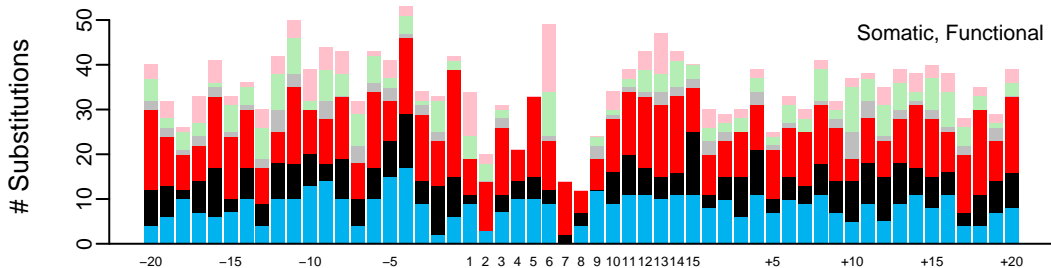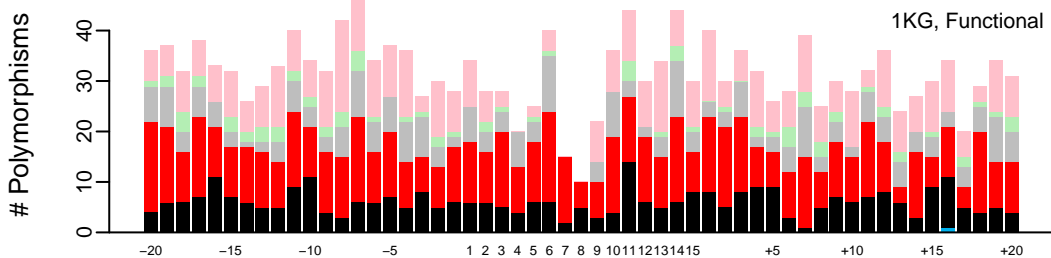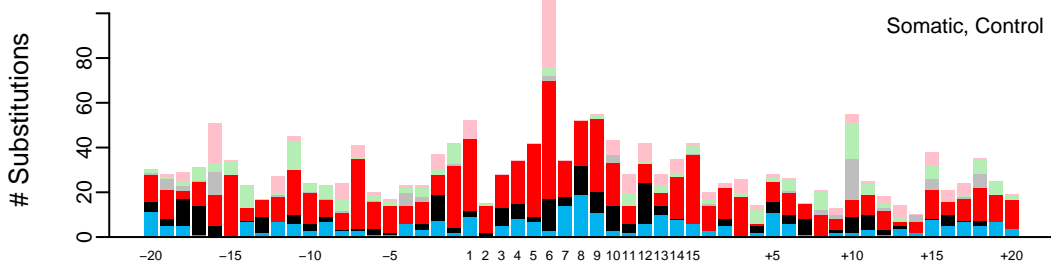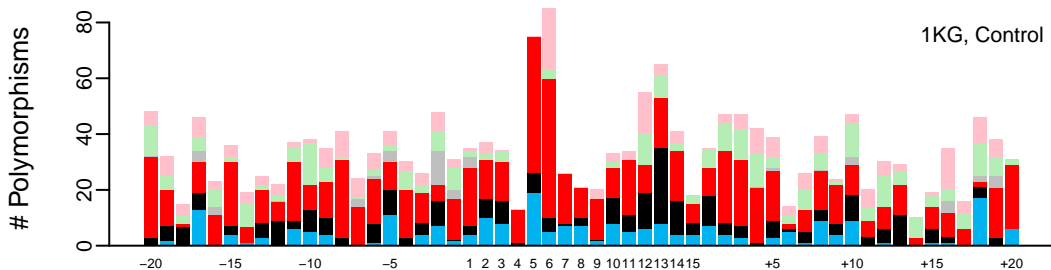

MOTIF POSITION

### STAT2::STAT1, MA0517.1

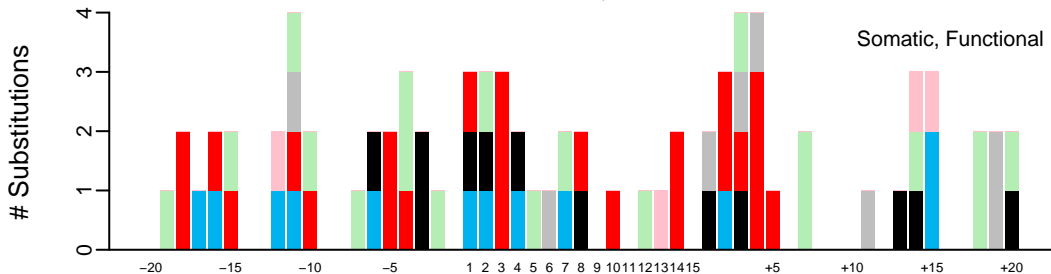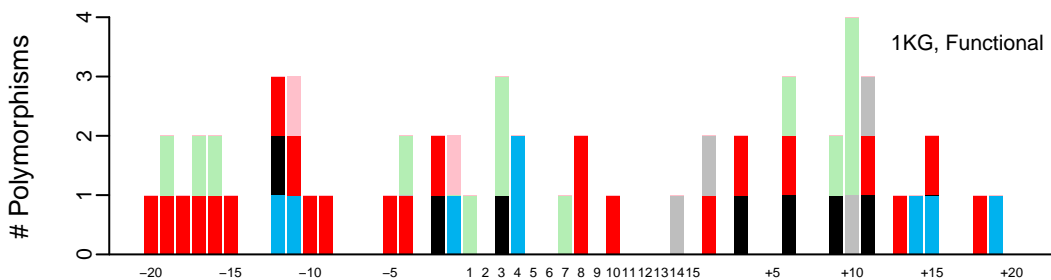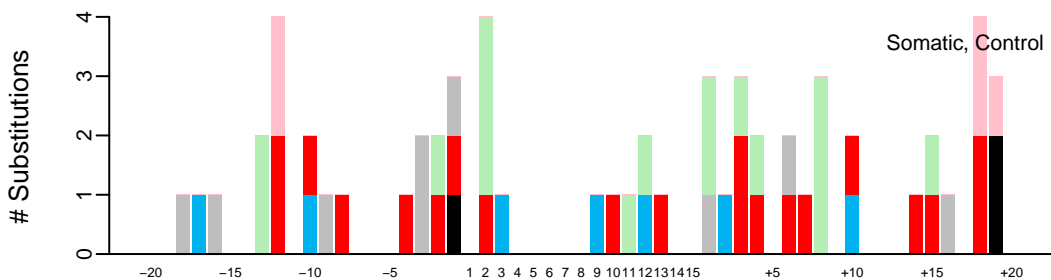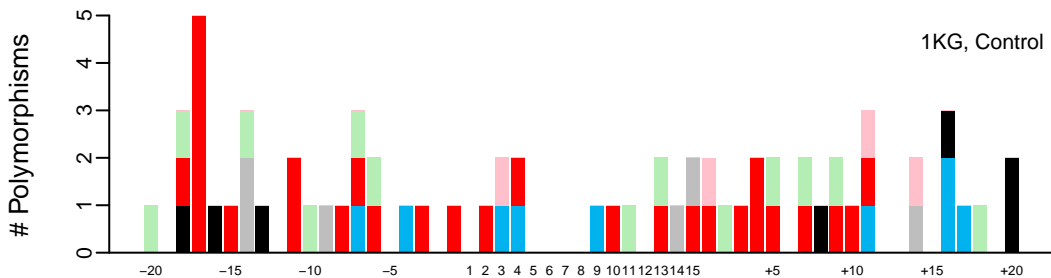

MOTIF POSITION

### TCF12, MA0521.1

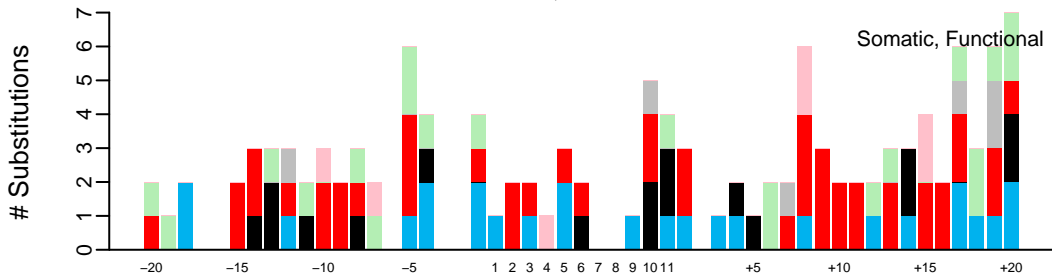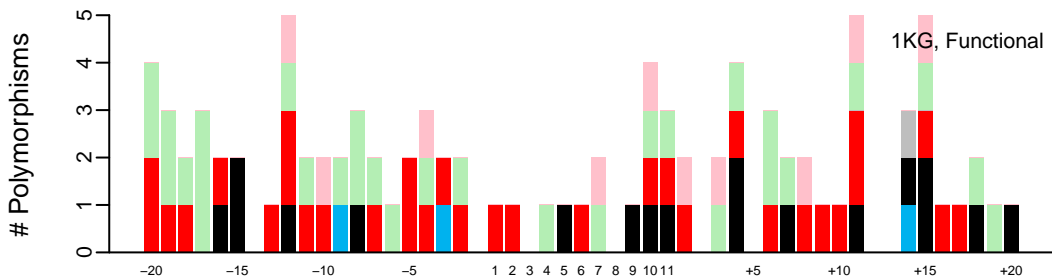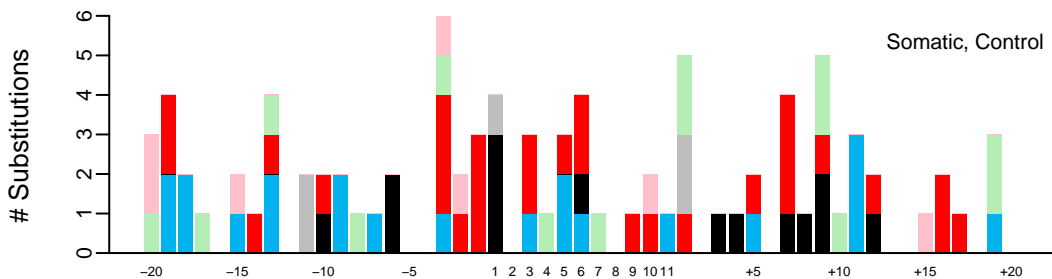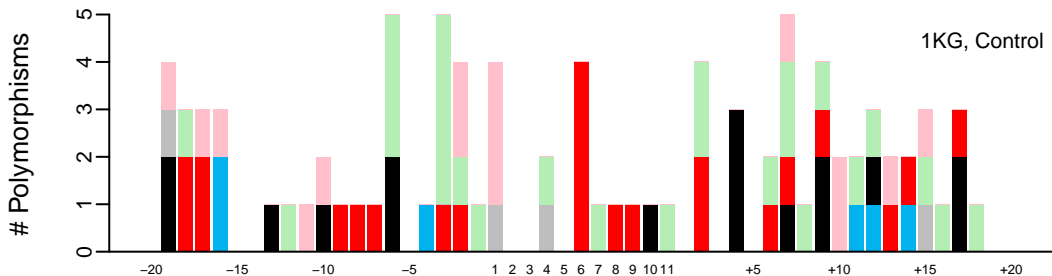

MOTIF POSITION

### TCF7L2, MA0523.1

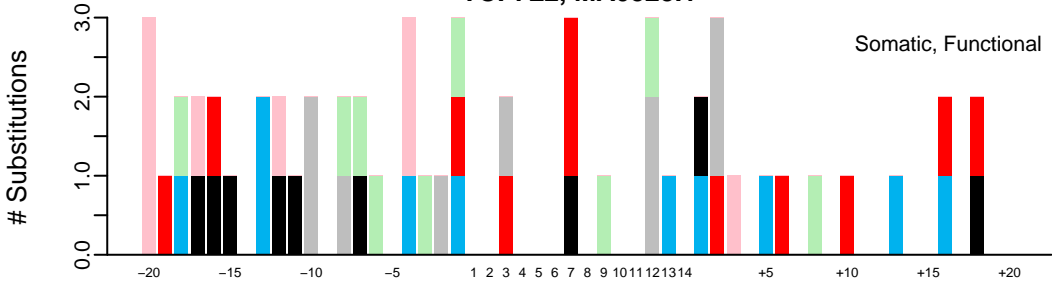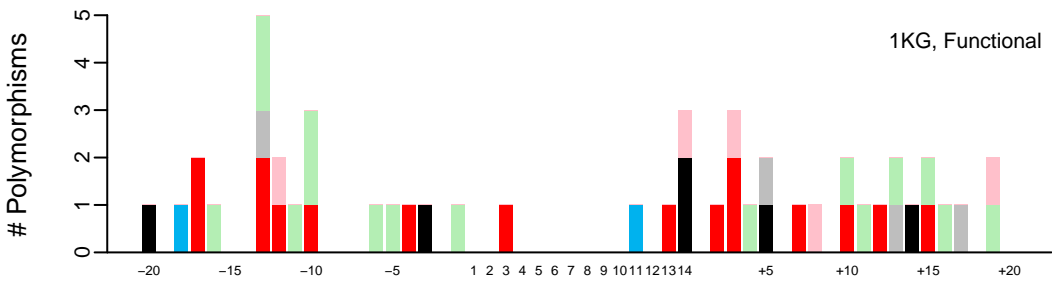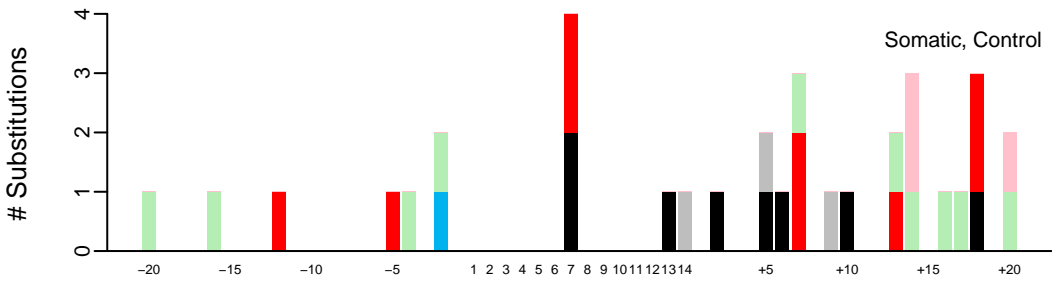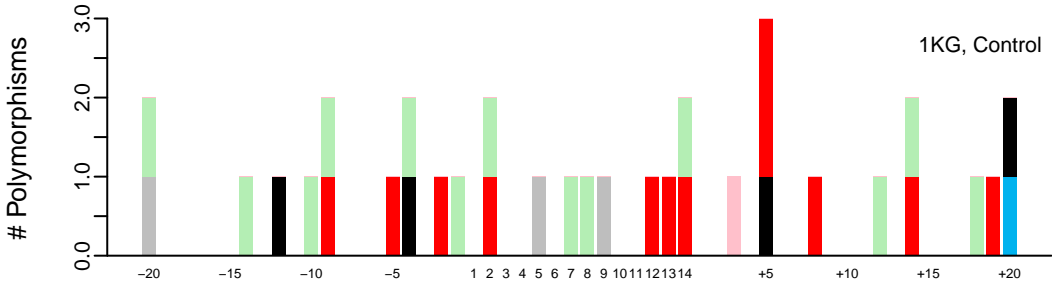

MOTIF POSITION

# TFAP2C, MA0524.1

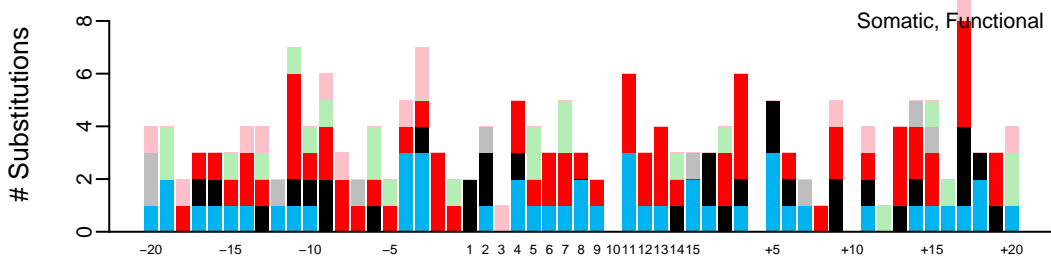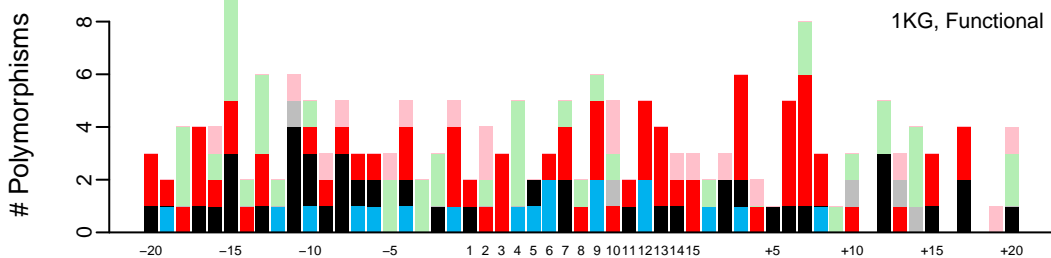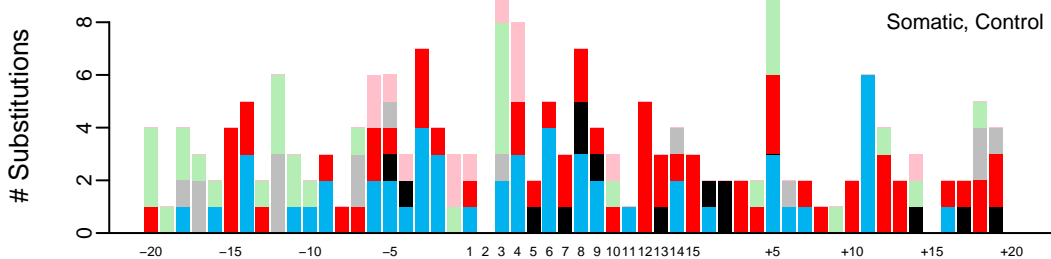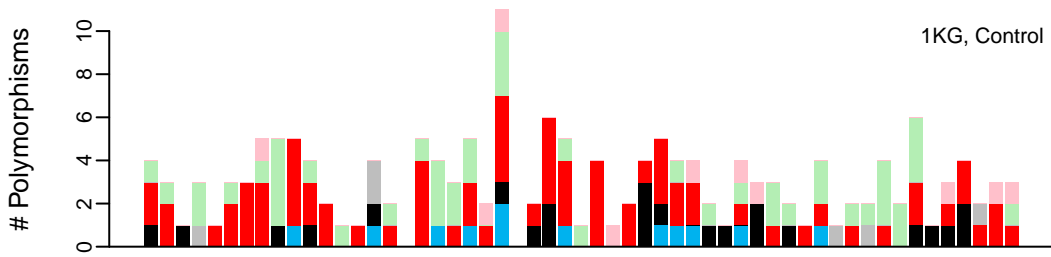

# TP63, MA0525.1

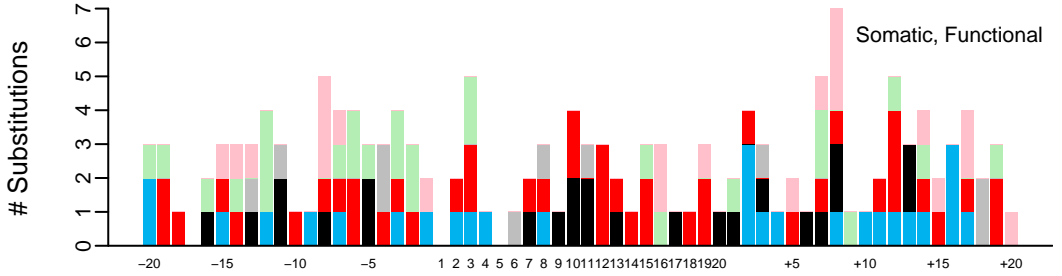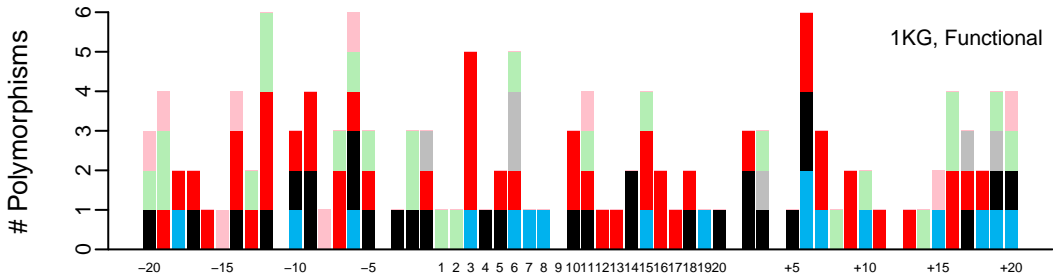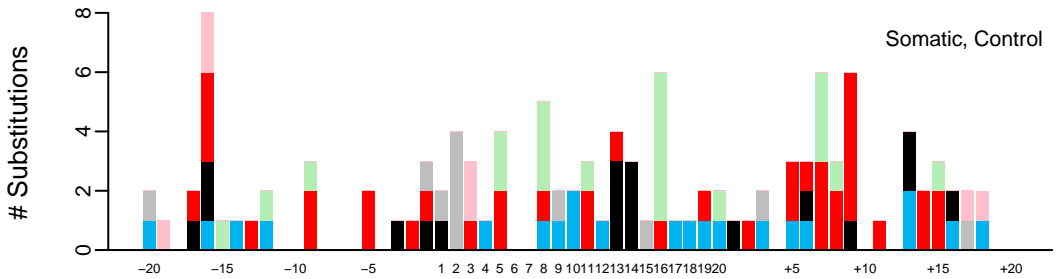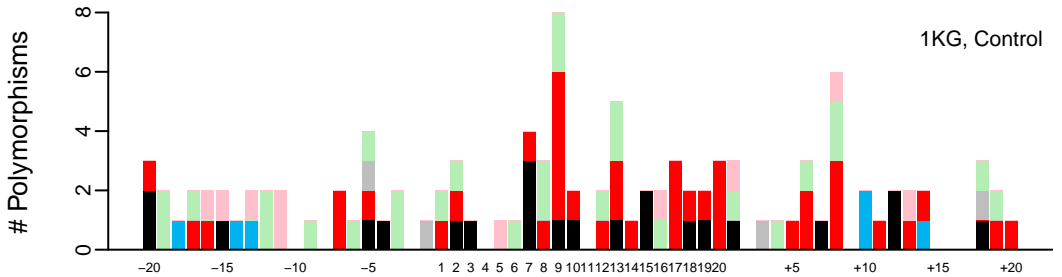

MOTIF POSITION

# USF2, MA0526.1

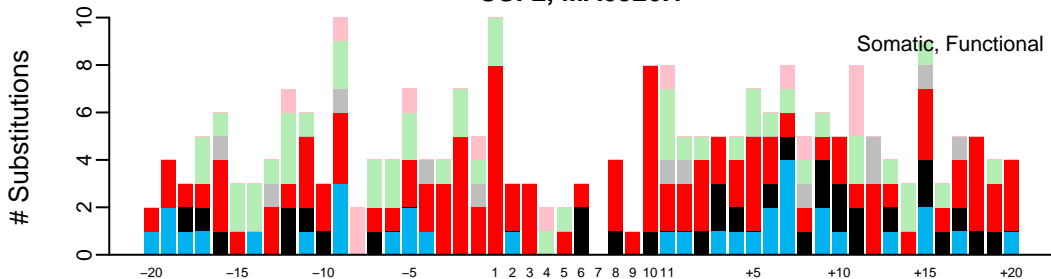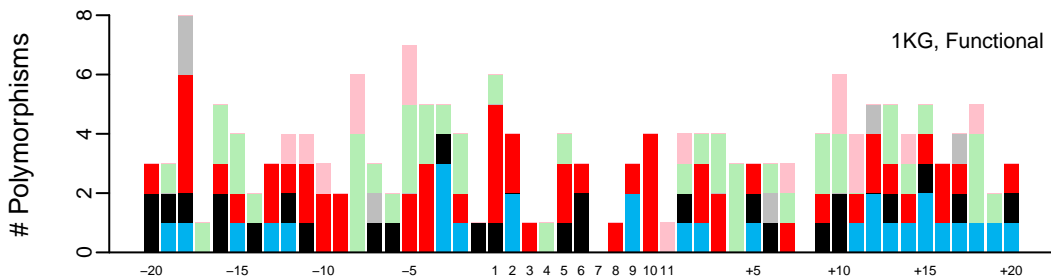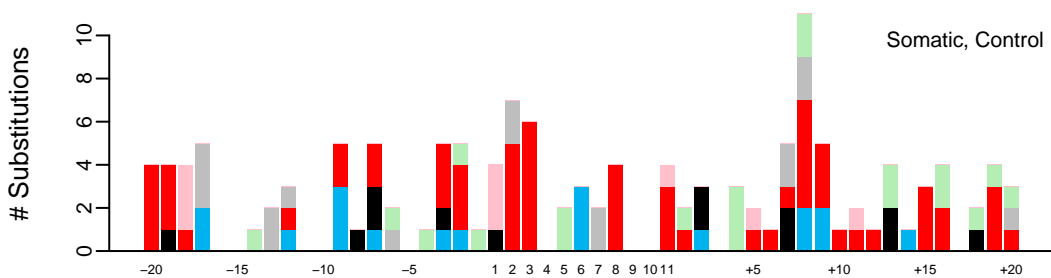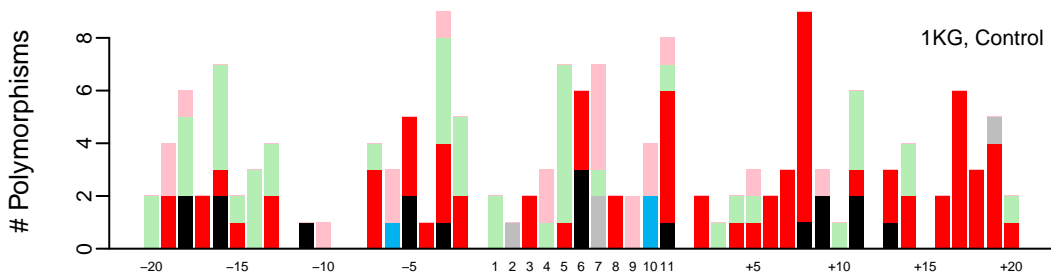

MOTIF POSITION

# ZBTB33, MA0527.1

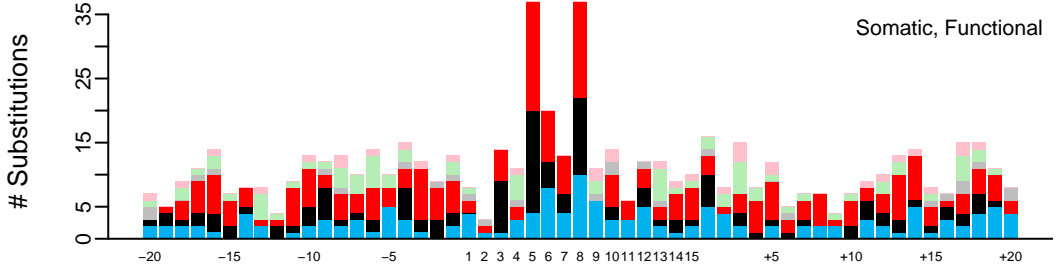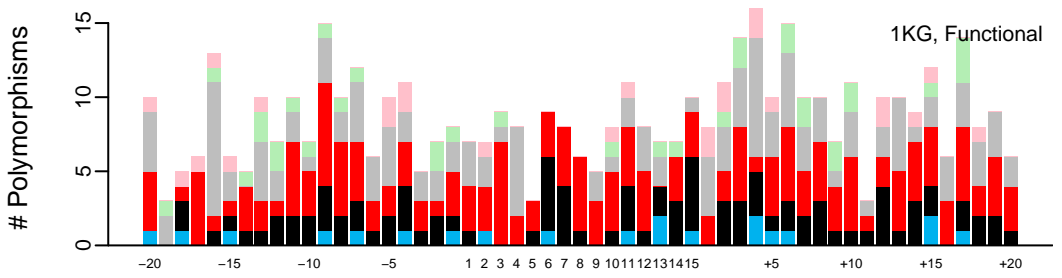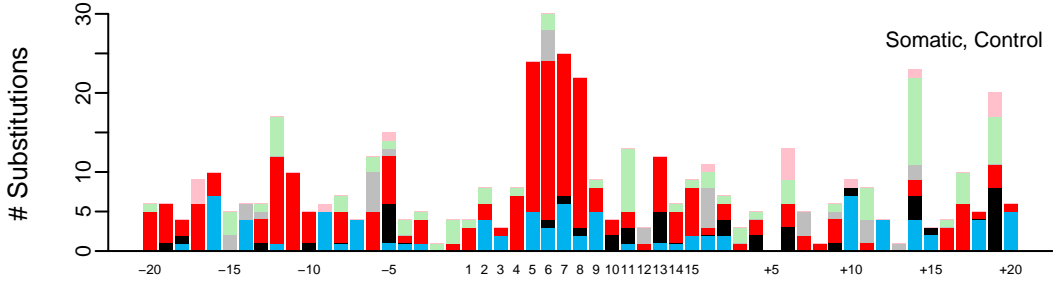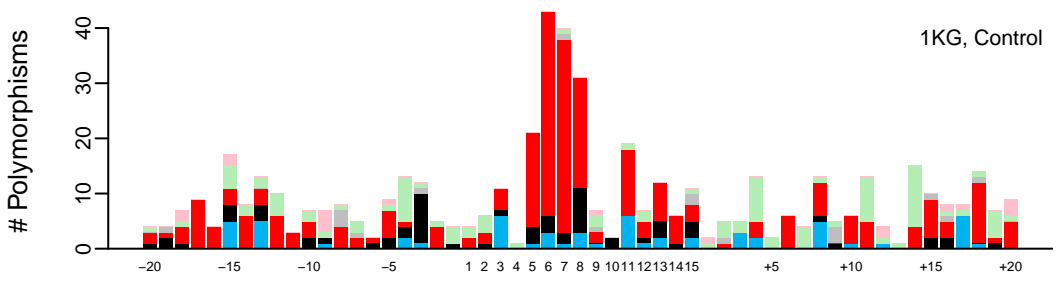

MOTIF POSITION



# ZNF263, MA0528.1

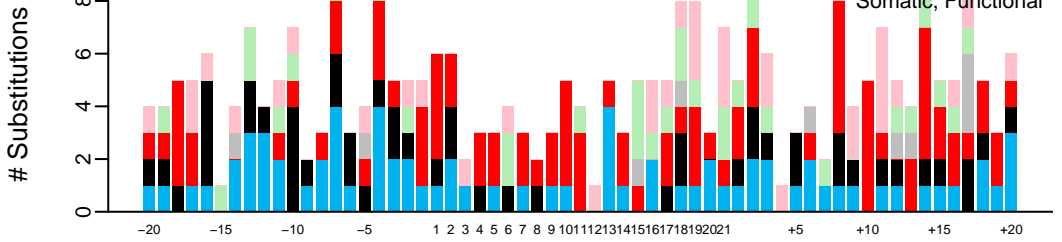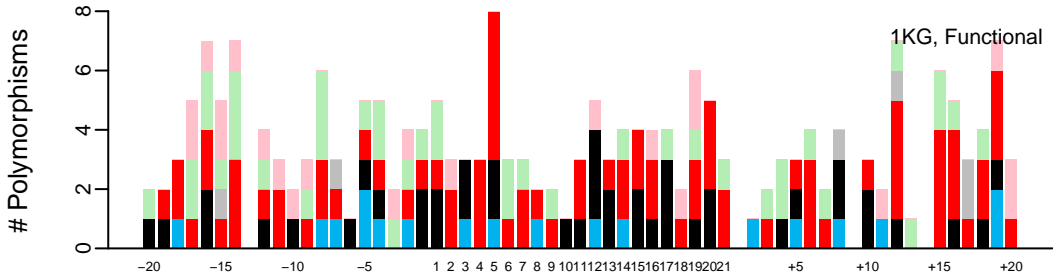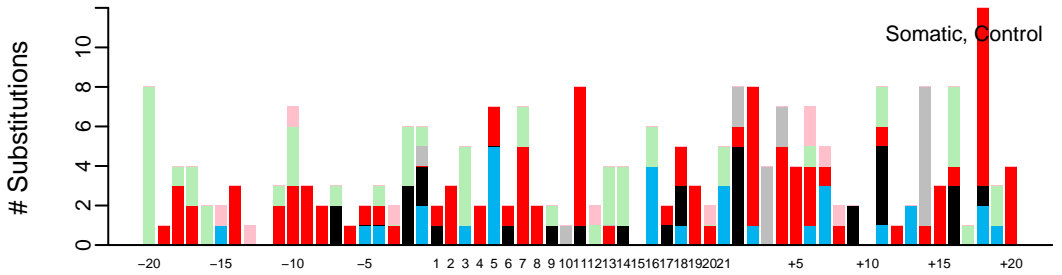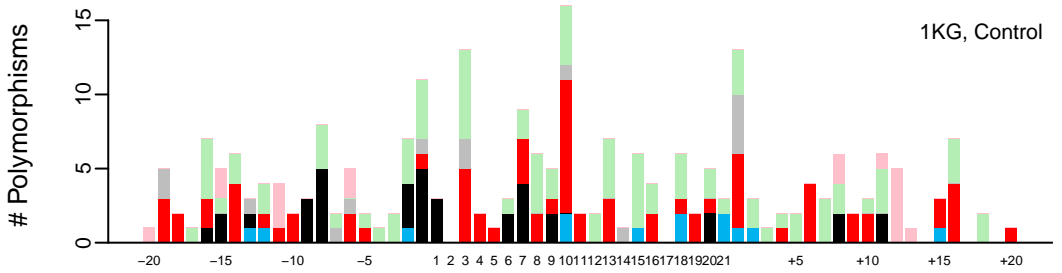

MOTIF POSITION

# CTCF, MA0531.1

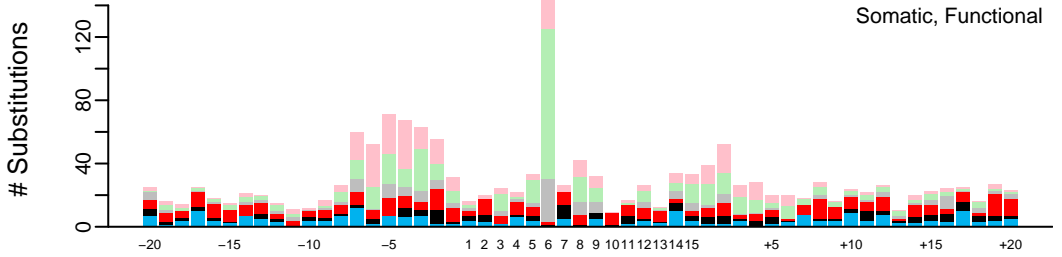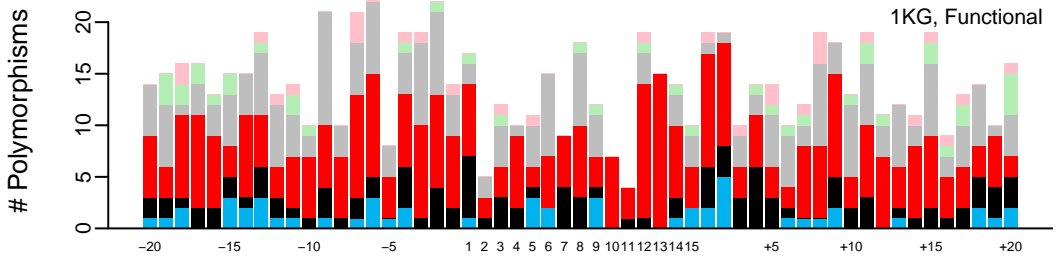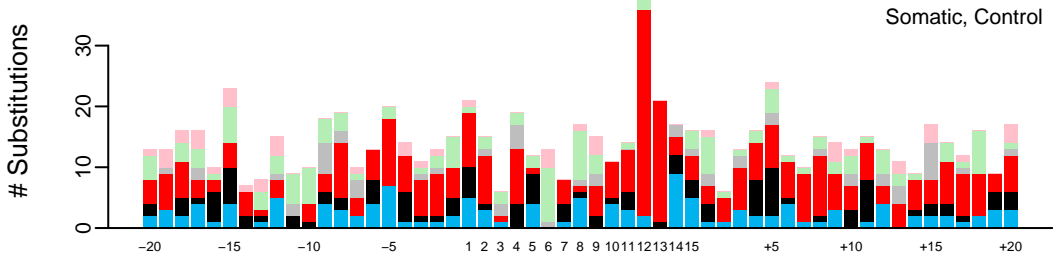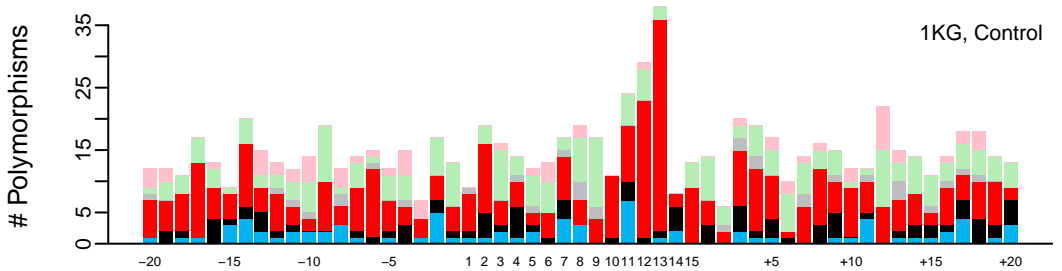

MOTIF POSITION

# E2F4, MA0541.1

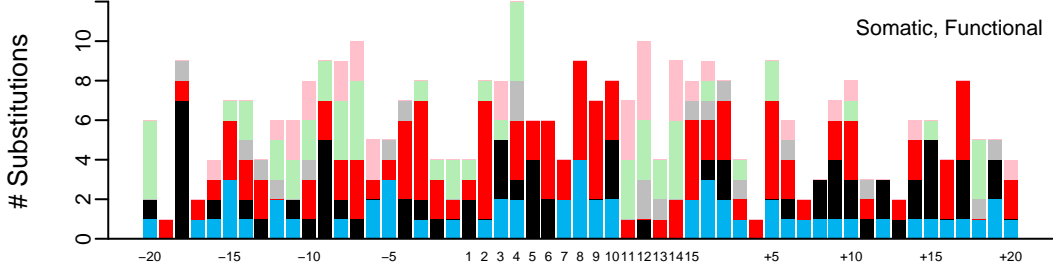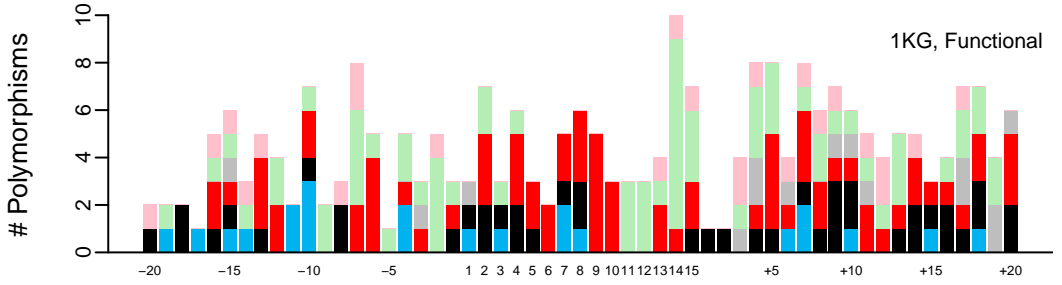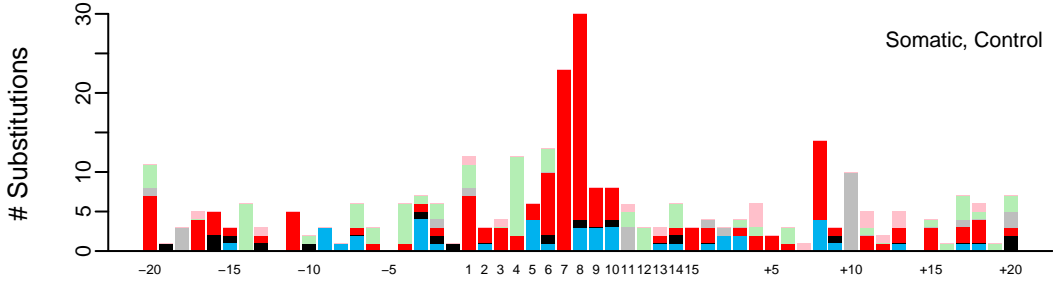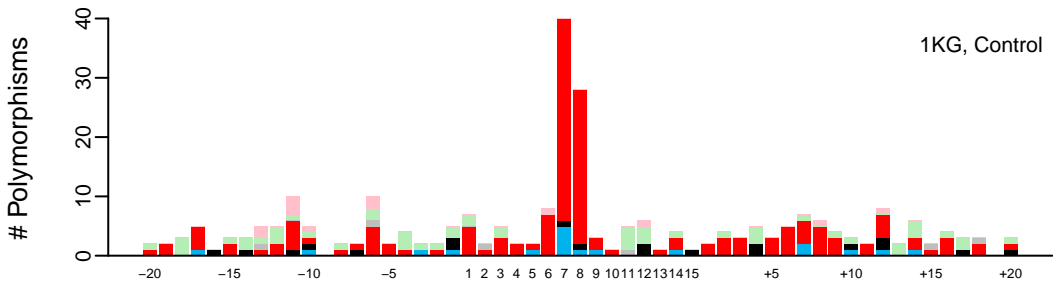

MOTIF POSITION

# FOXA1, MA0546.1

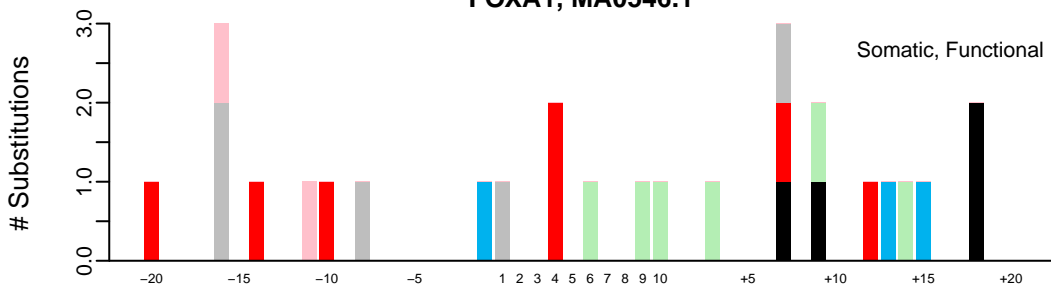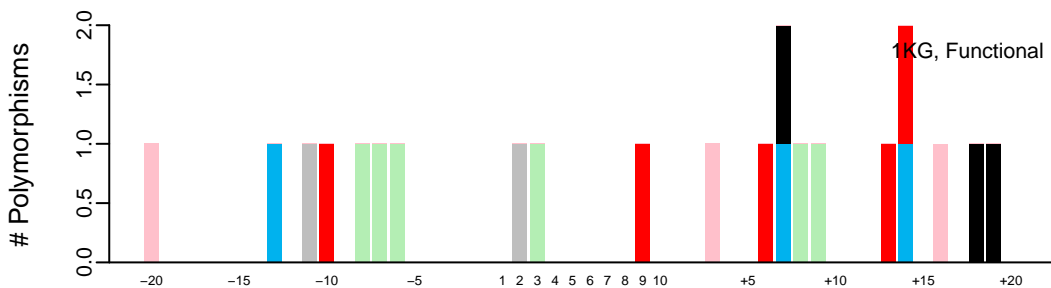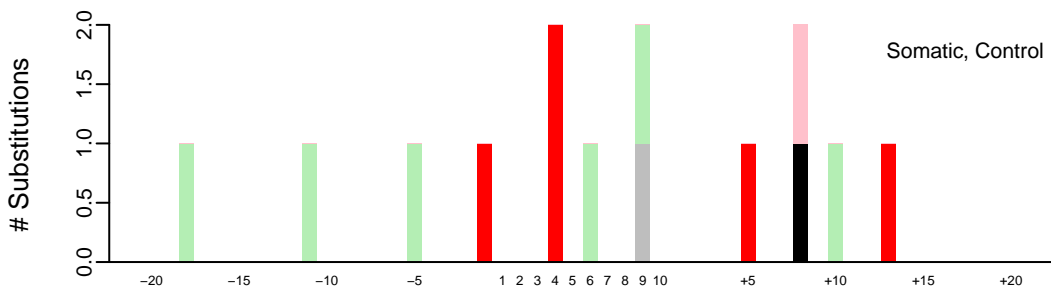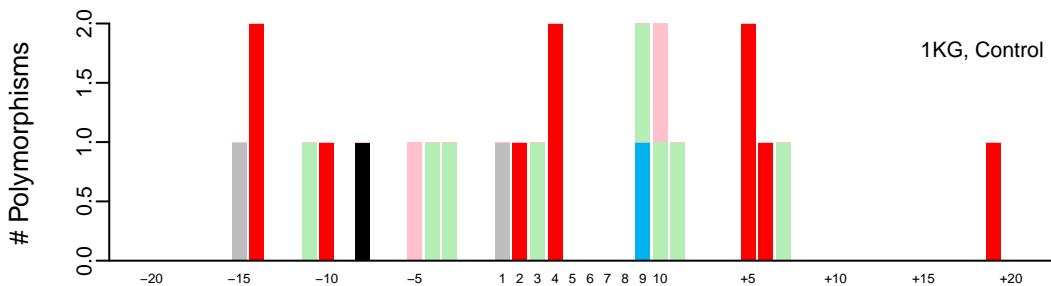

MOTIF POSITION

# MEF2C, MA0555.1

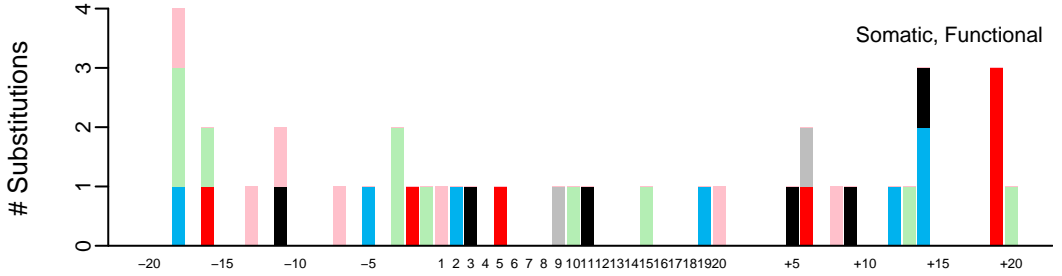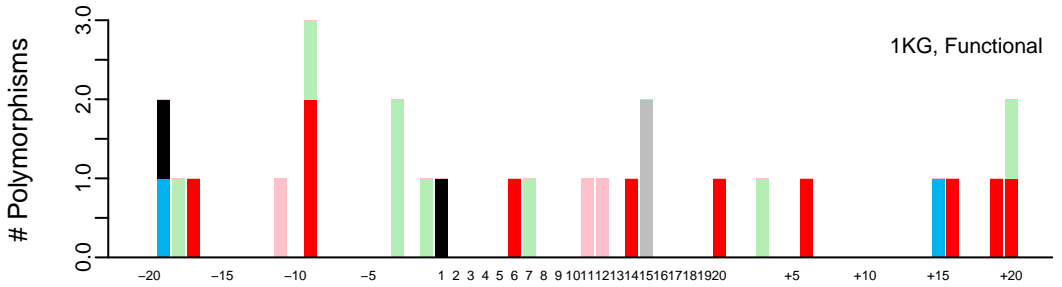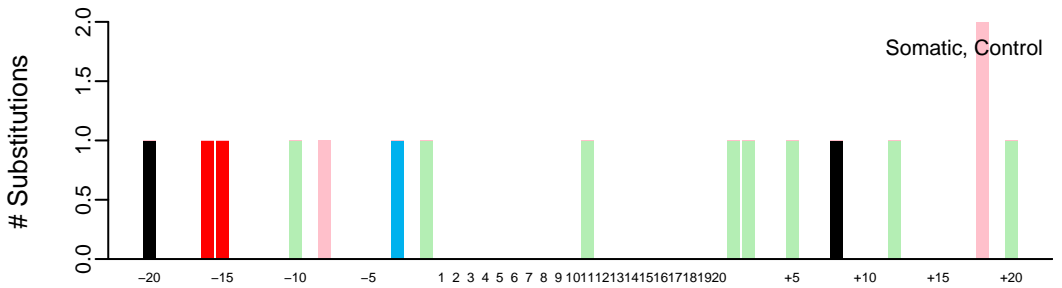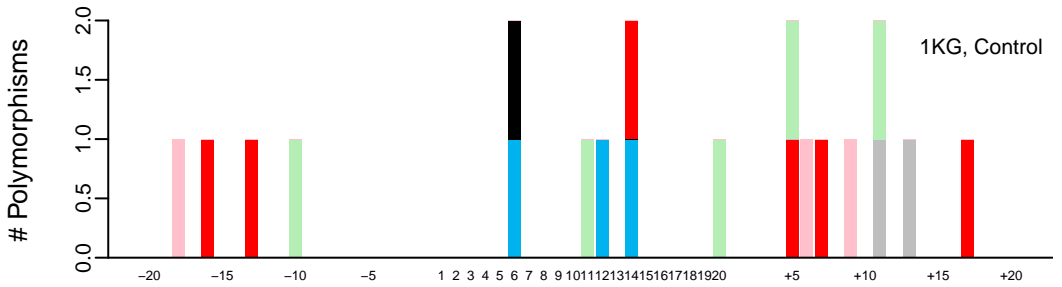

MOTIF POSITION

# MEF2C, MA0559.1

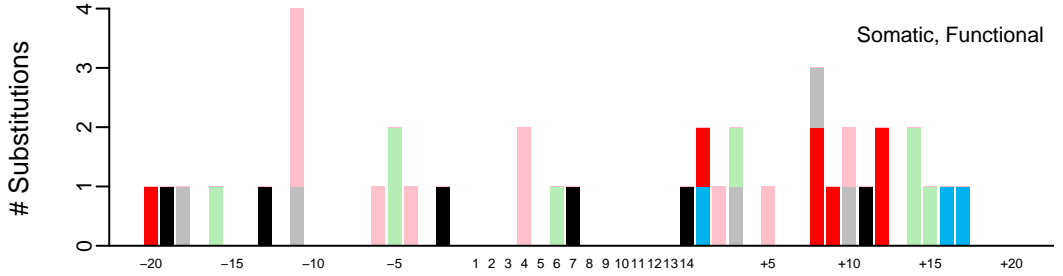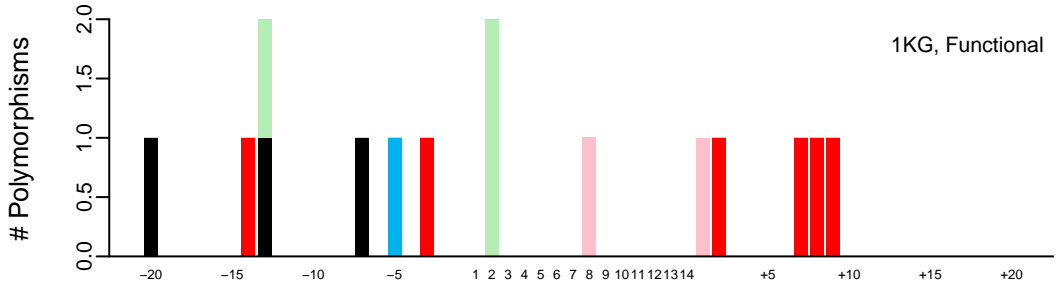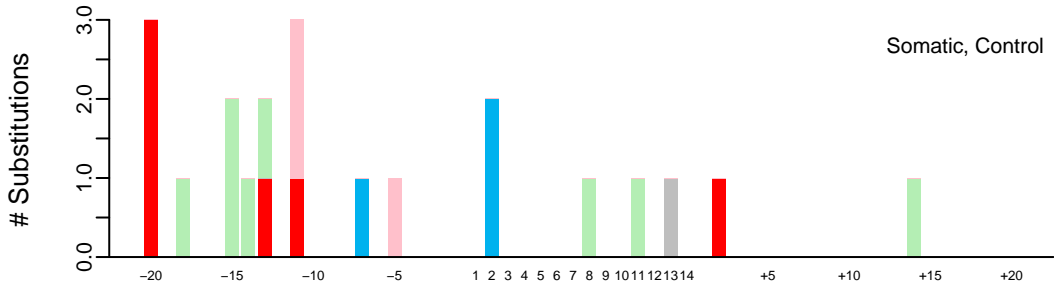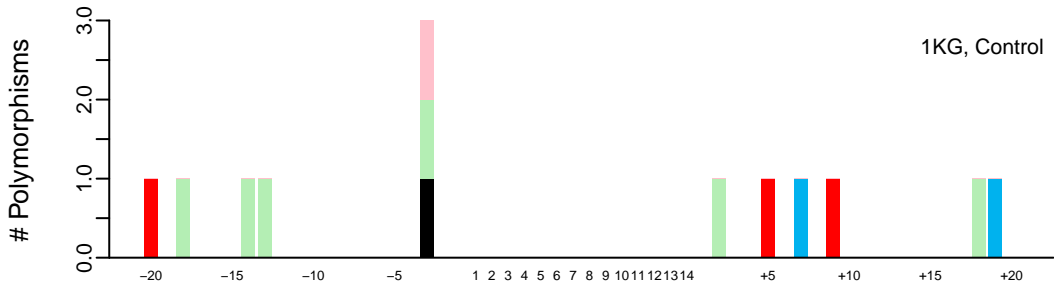

MOTIF POSITION

# MAX, MA0568.1

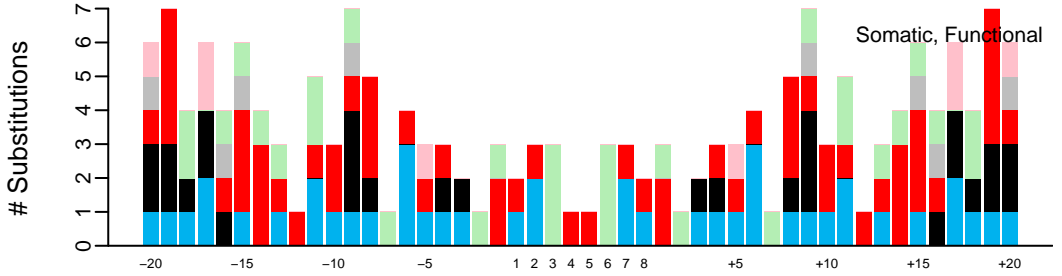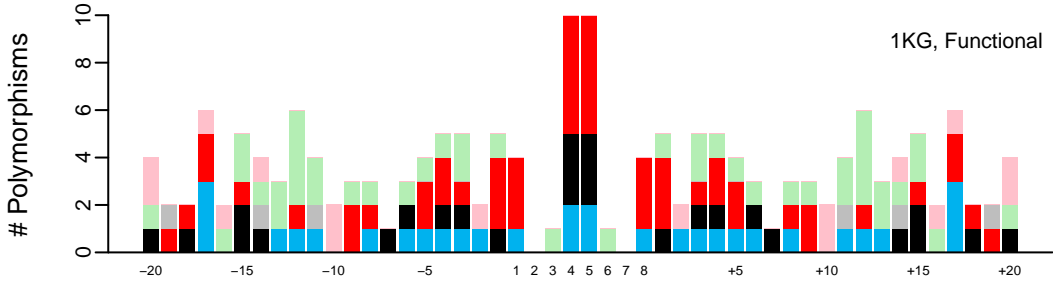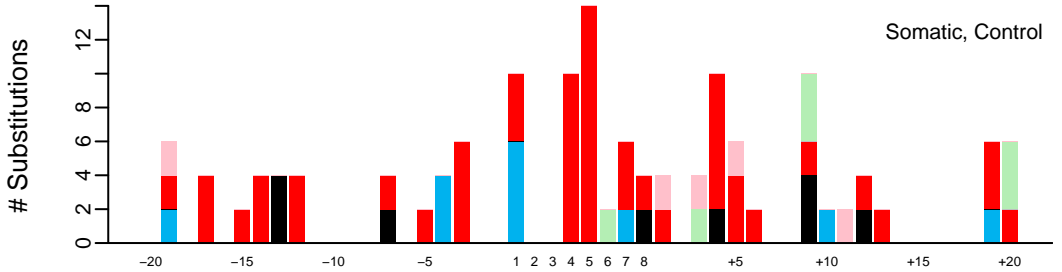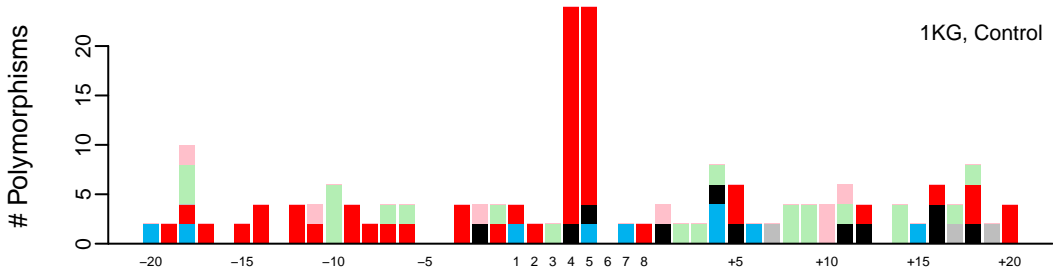

MOTIF POSITION

# MAX, MA0569.1

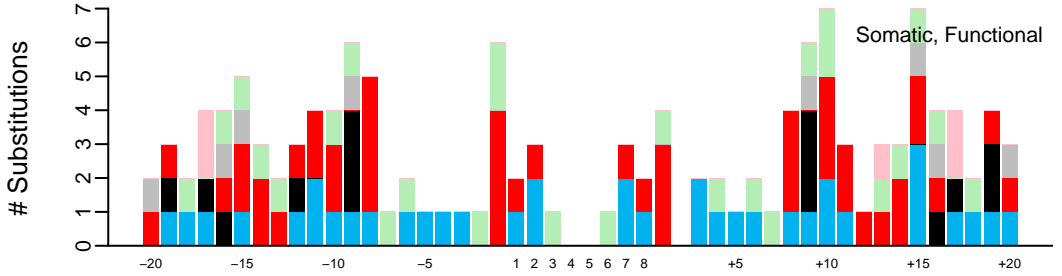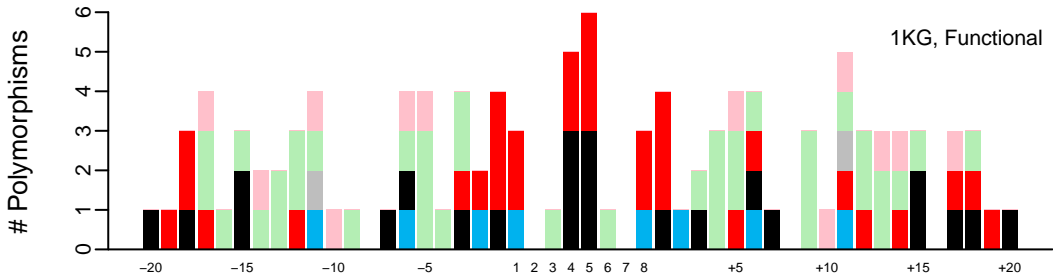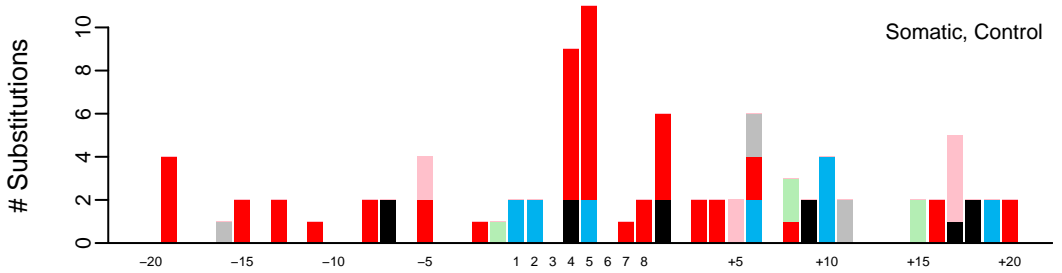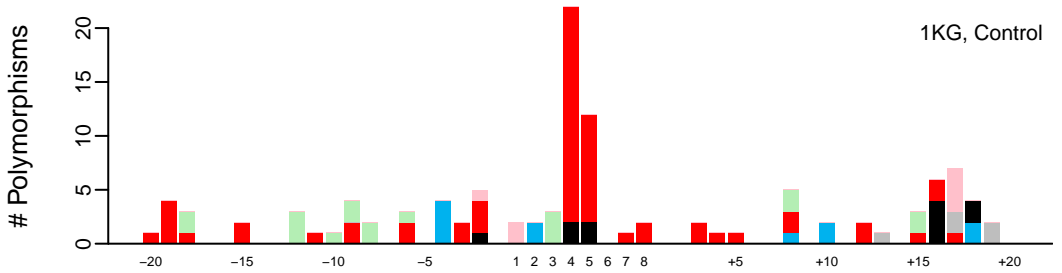

MOTIF POSITION



# MEF2A, MA0585.1

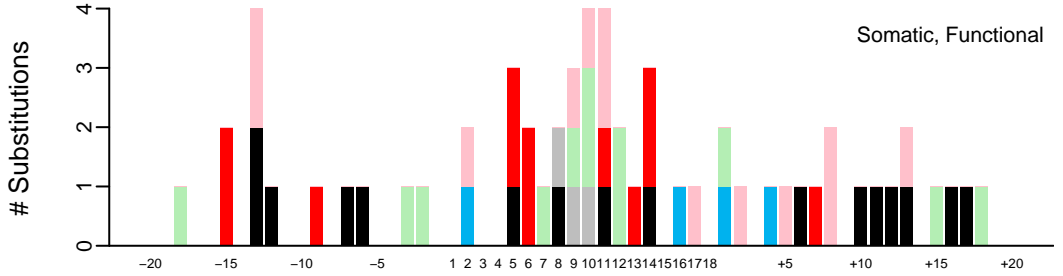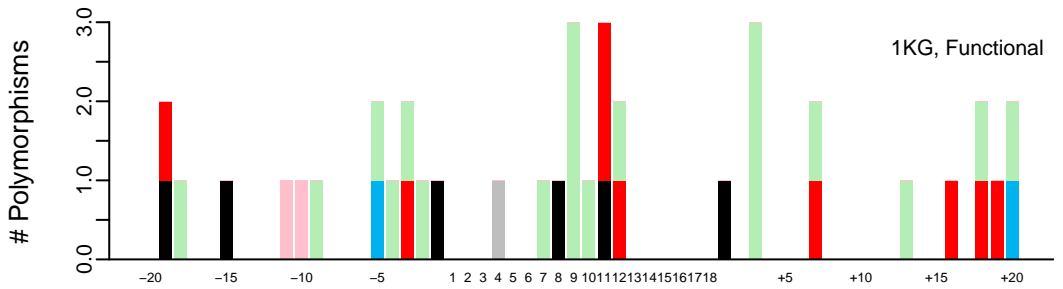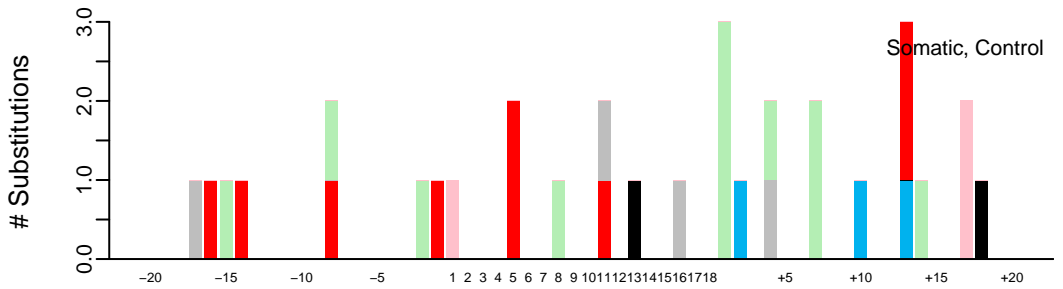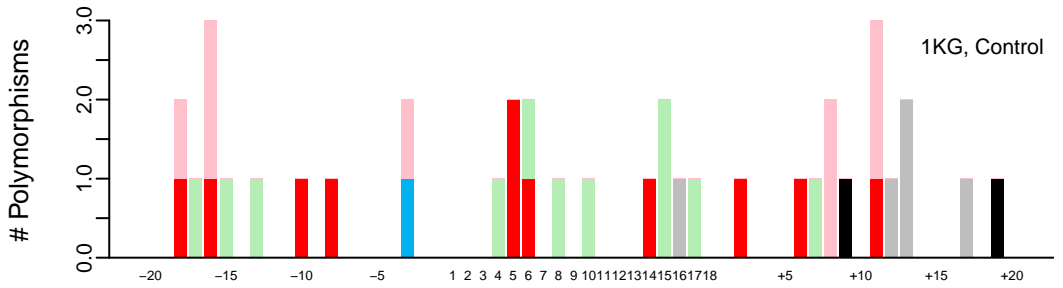

MOTIF POSITION

# SREBP1, MA0595.1

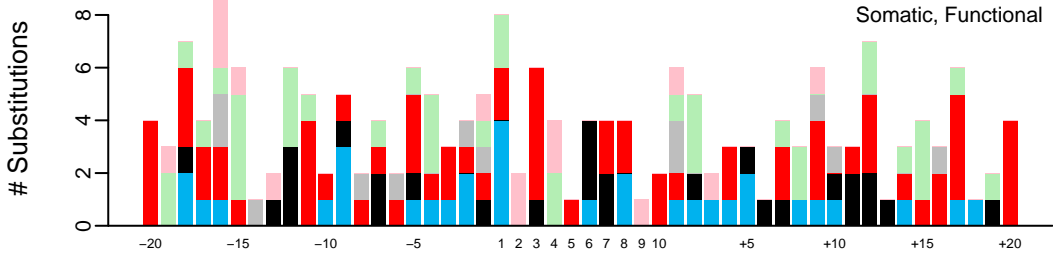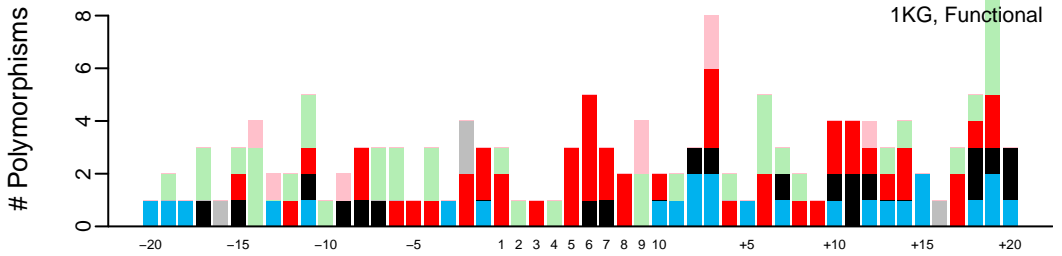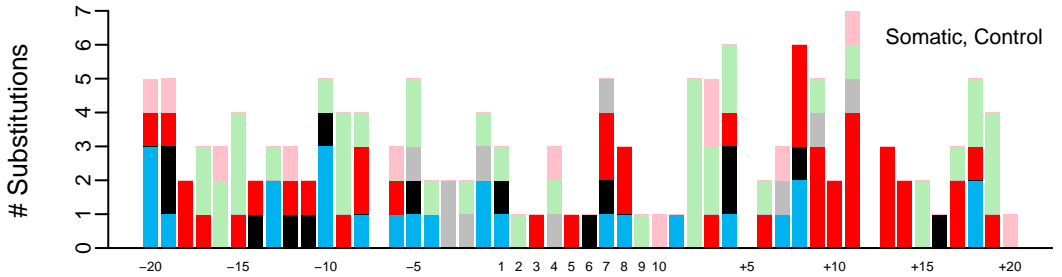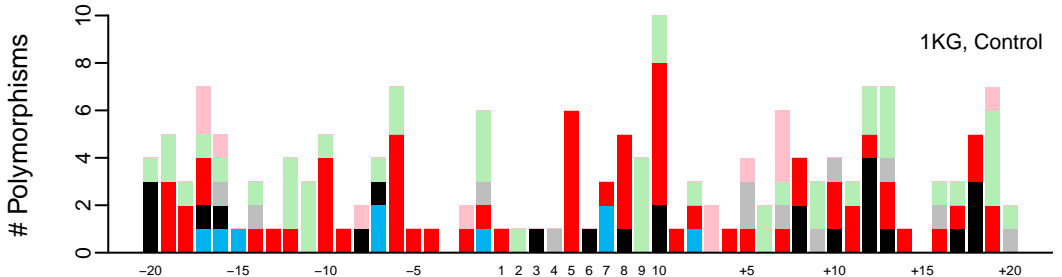

MOTIF POSITION

### SREBP2, MA0596.1

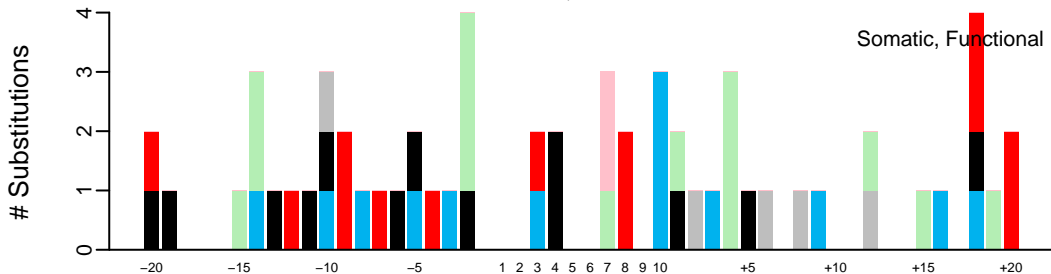

Somatic, Functional

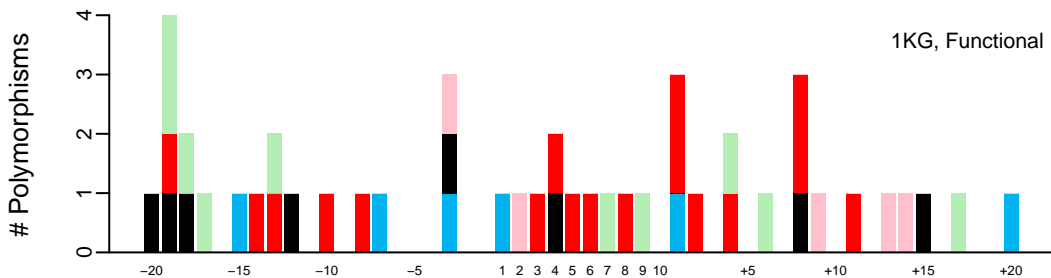

1KG, Functional

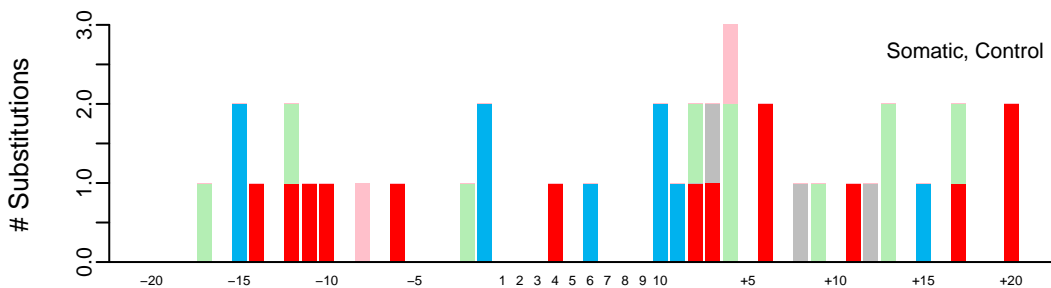

Somatic, Control

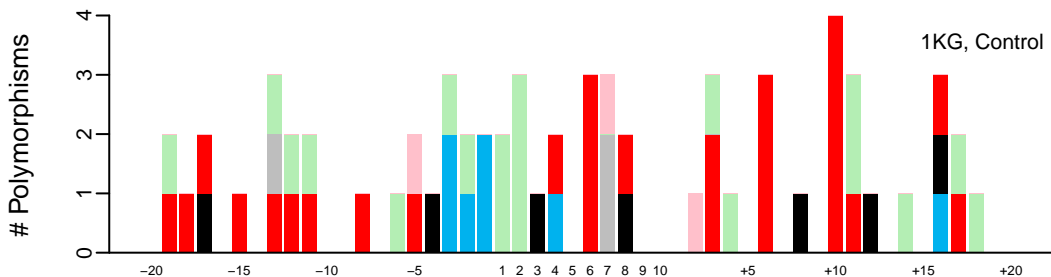

1KG, Control

MOTIF POSITION

# THAP1, MA0597.1

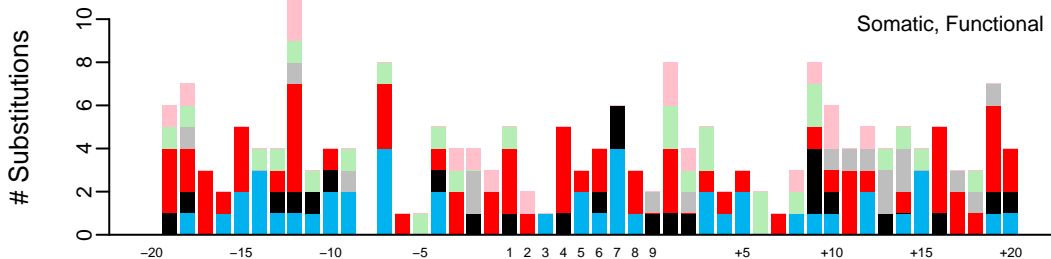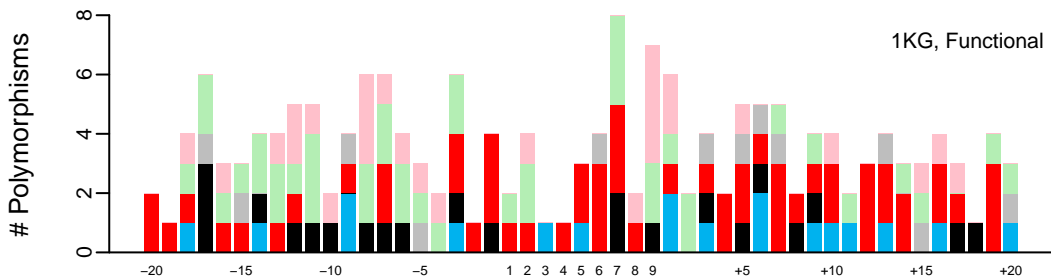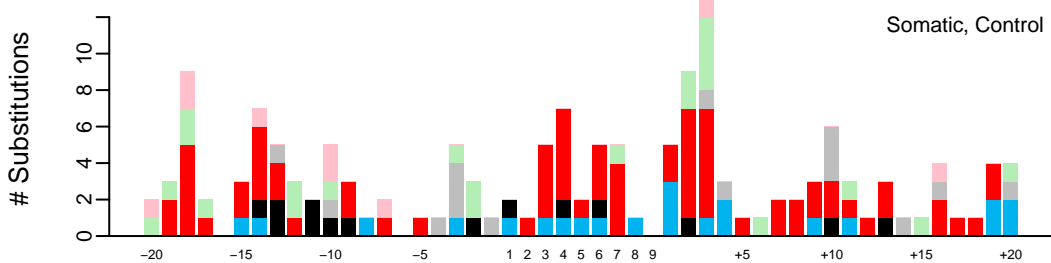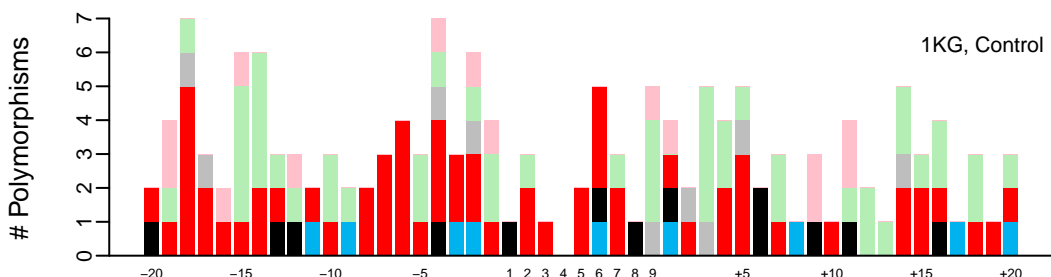

MOTIF POSITION

# BHLHE40, PB0007.1

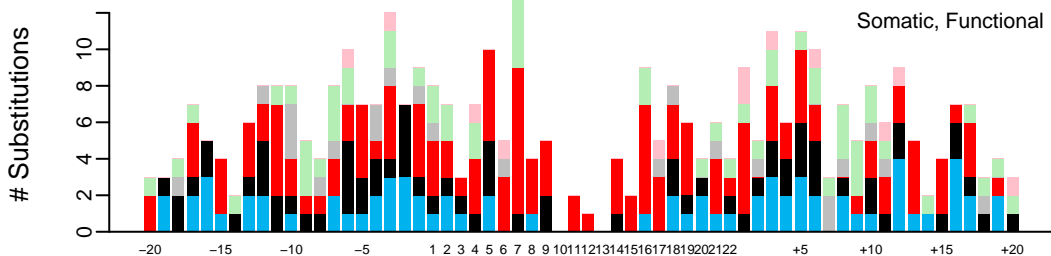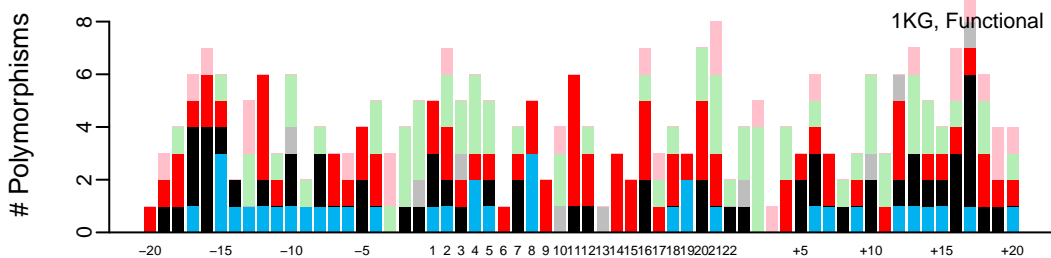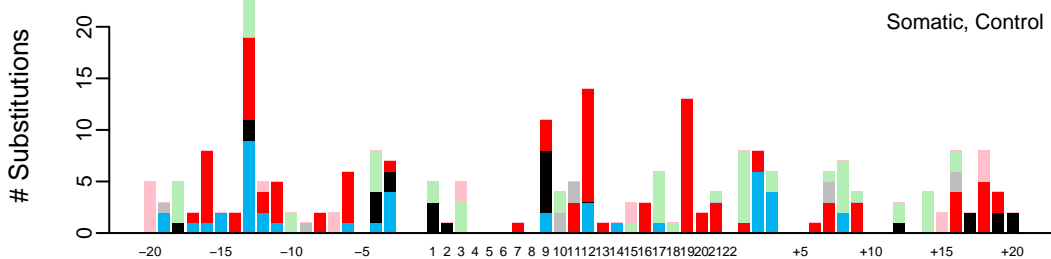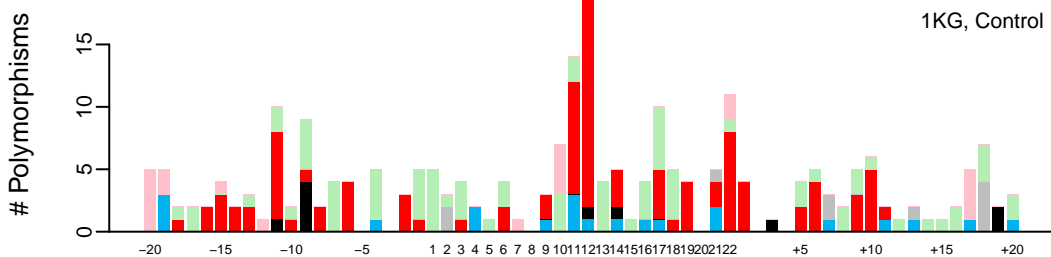

MOTIF POSITION

# EGR1, PB0010.1

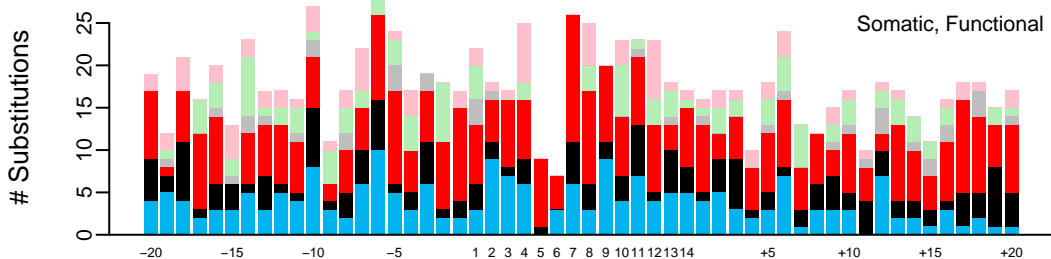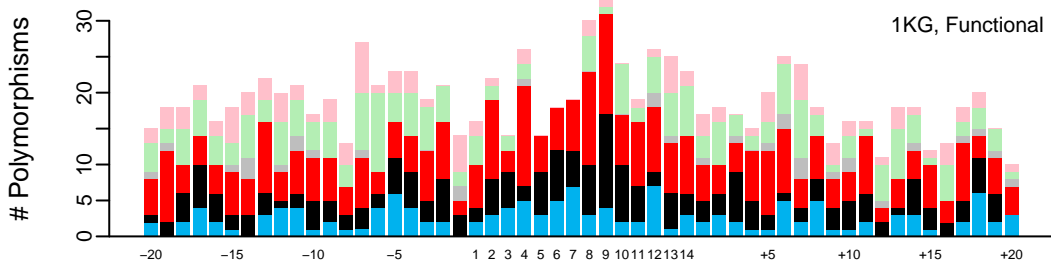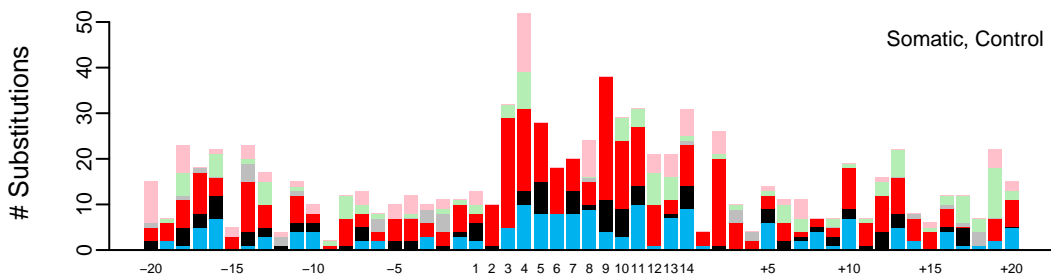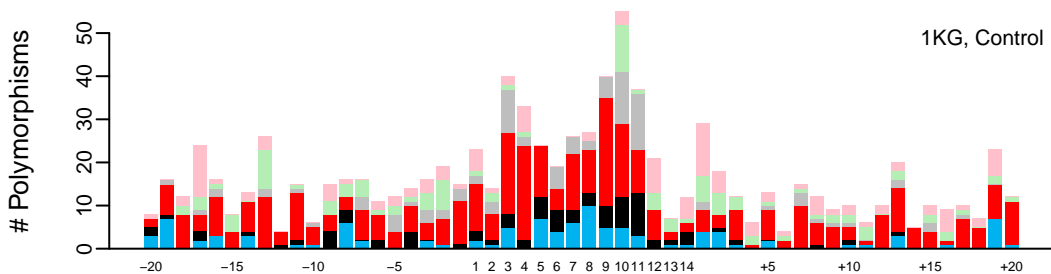

MOTIF POSITION

### FOXA2, PB0015.1

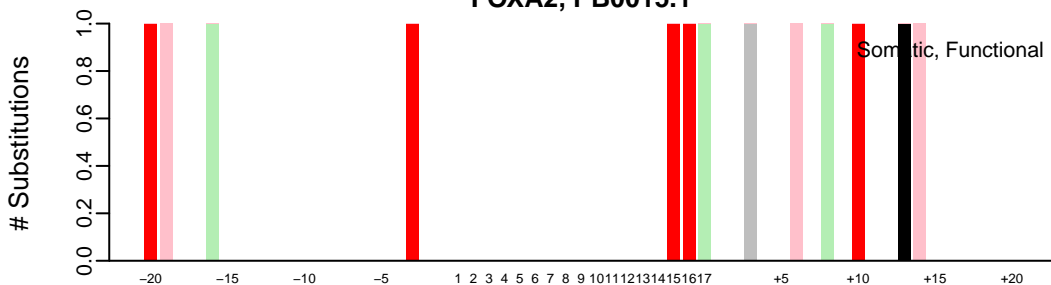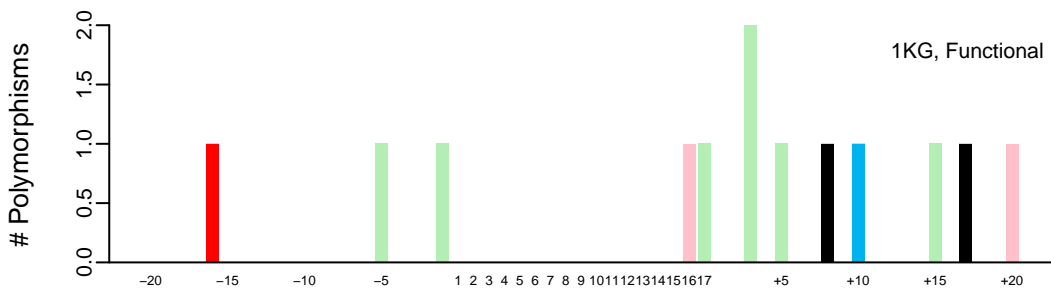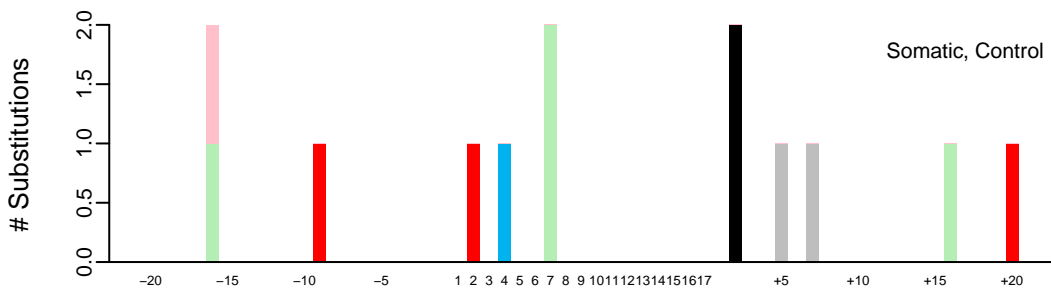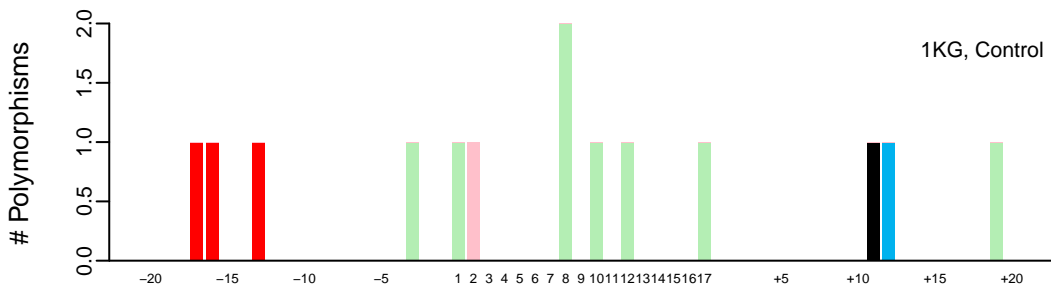

MOTIF POSITION

# GABP, PB0020.1

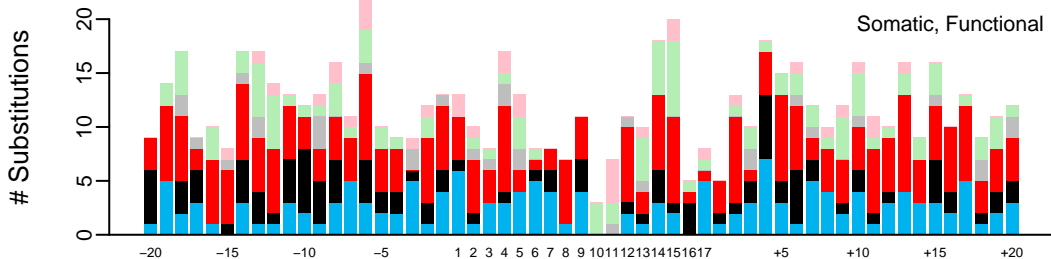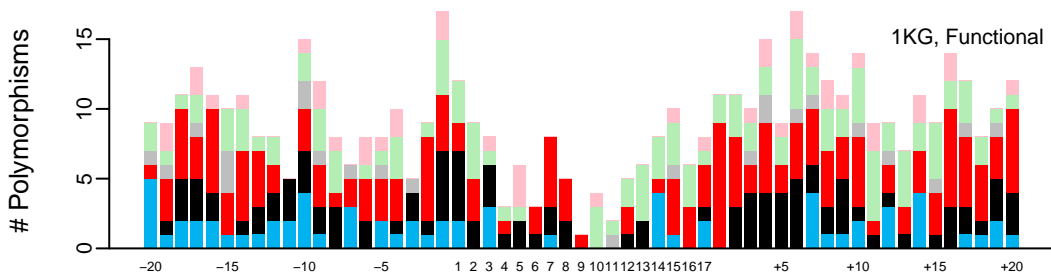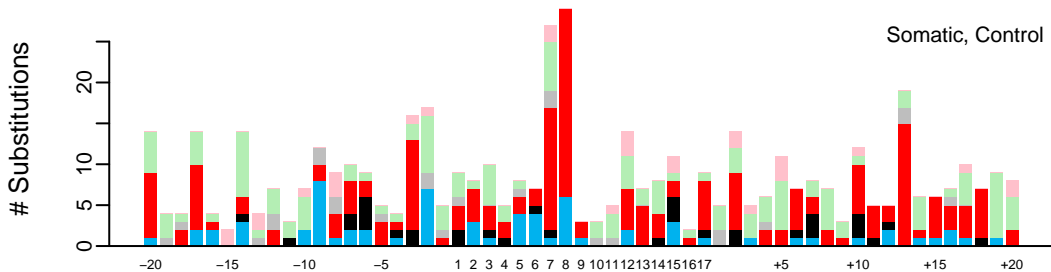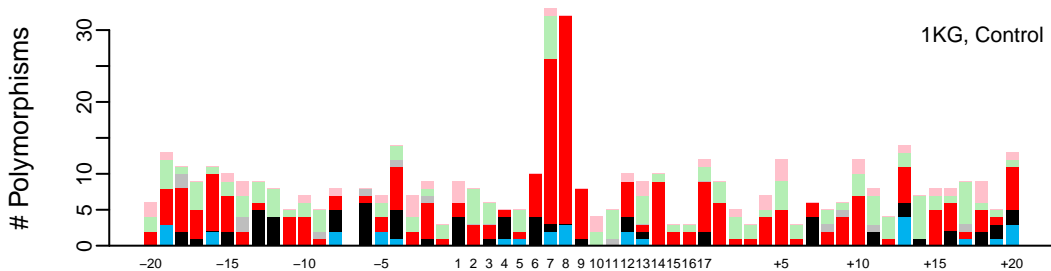

MOTIF POSITION



### HNF4A, PB0030.1

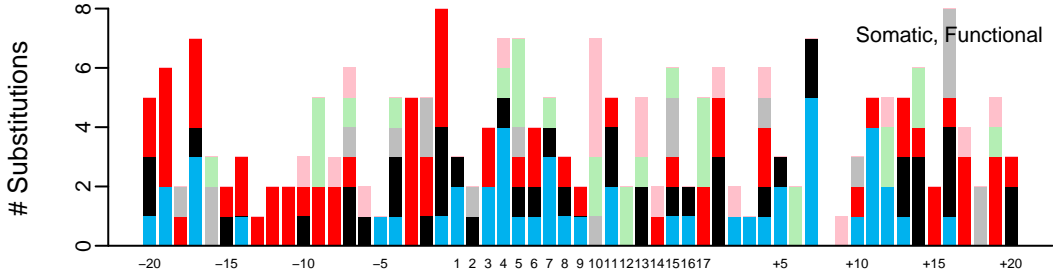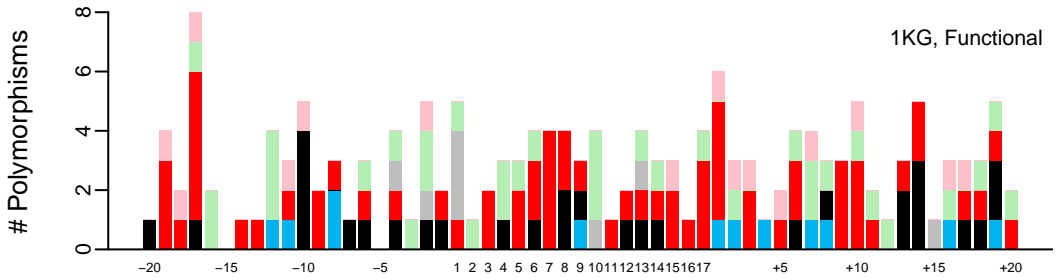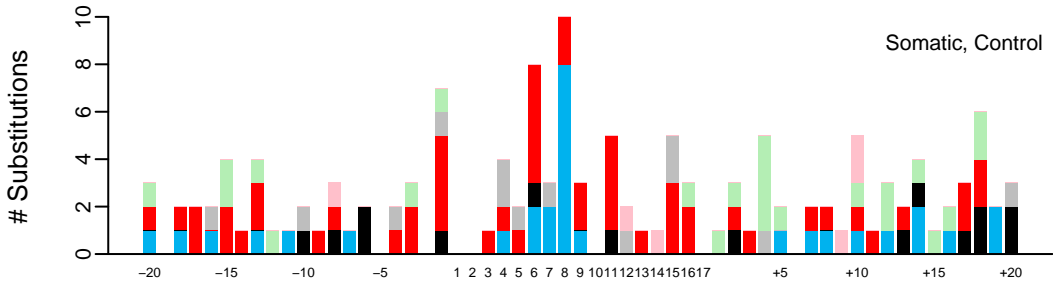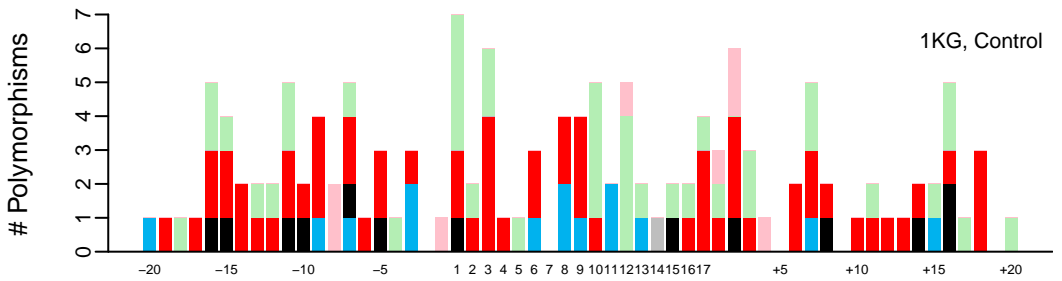

MOTIF POSITION

### IRF4, PB0034.1

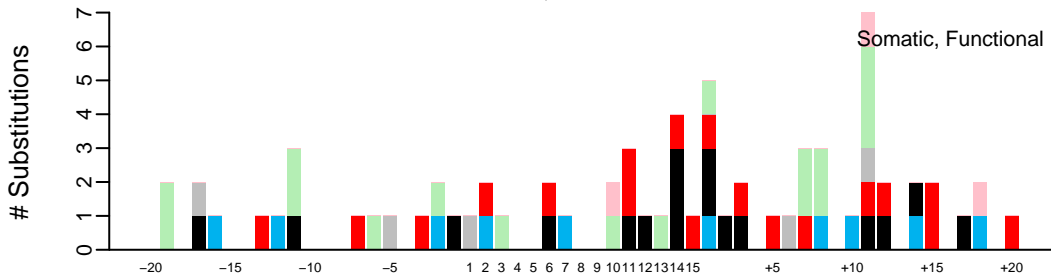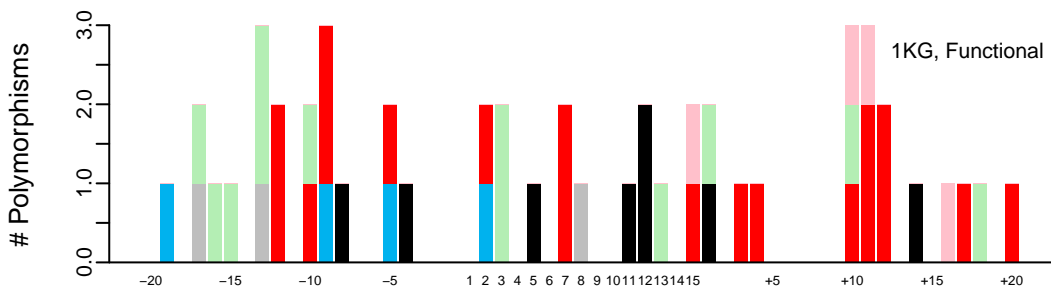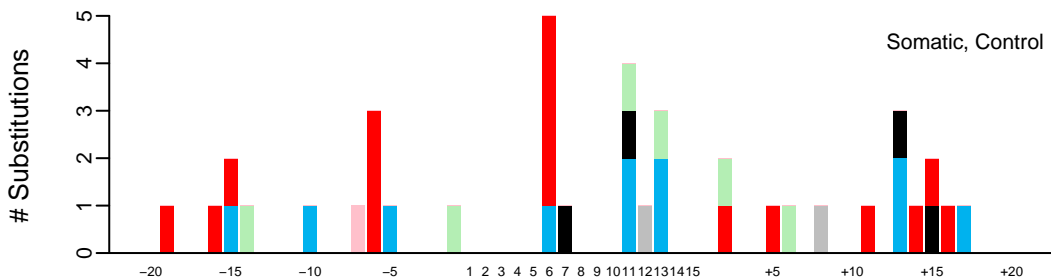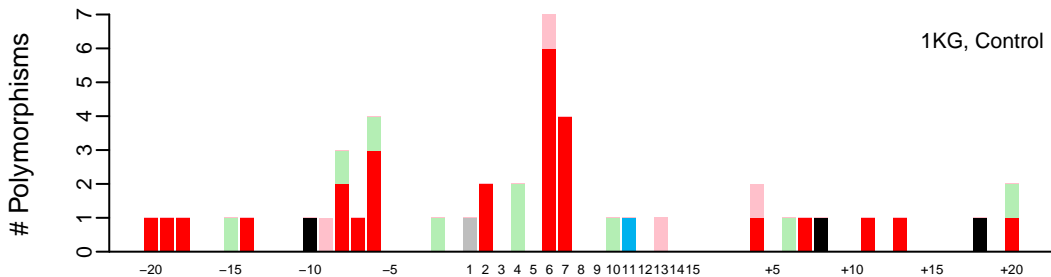

MOTIF POSITION

# MAX, PB0043.1

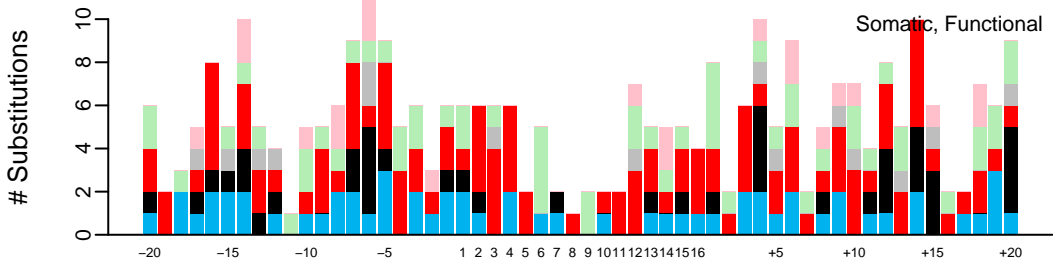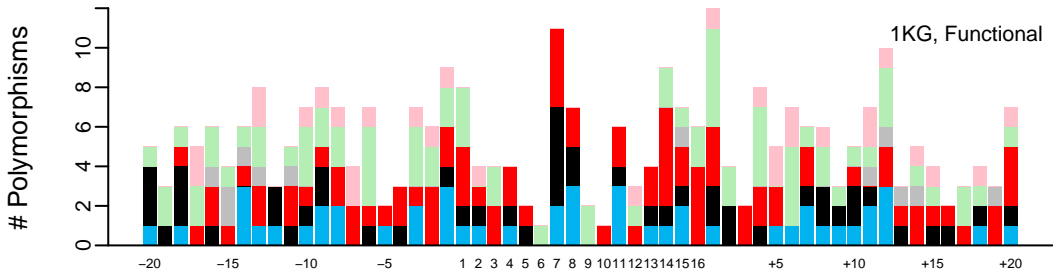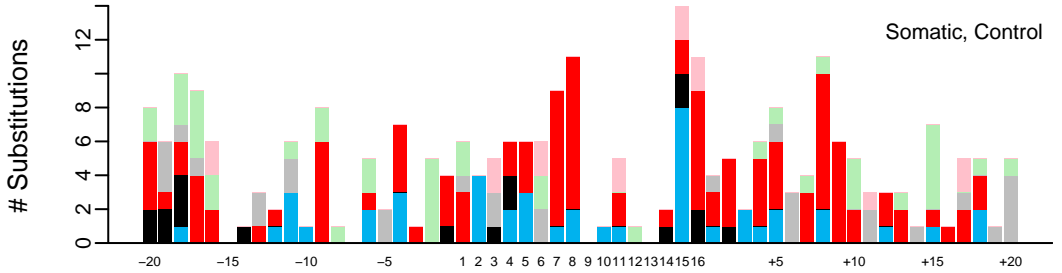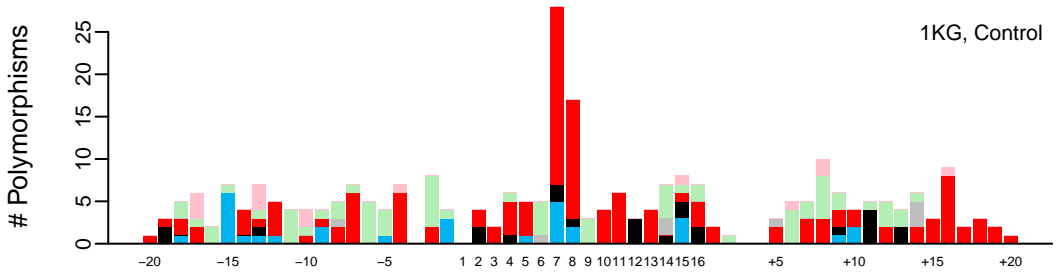

MOTIF POSITION

# PU1, PB0058.1

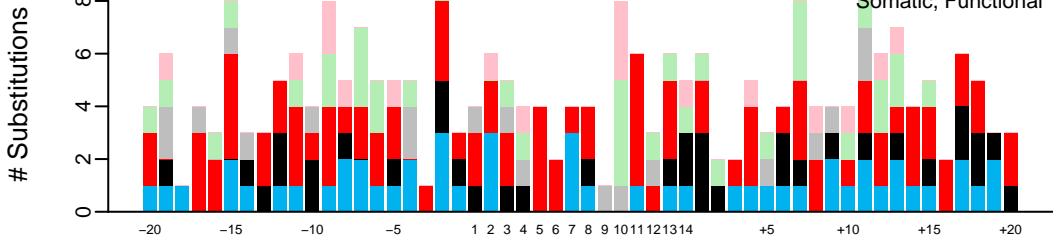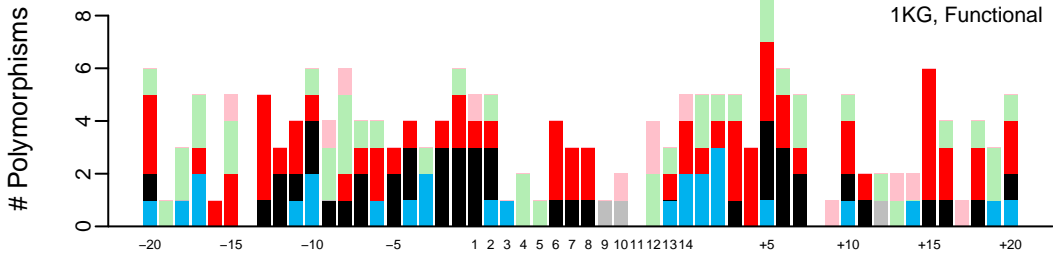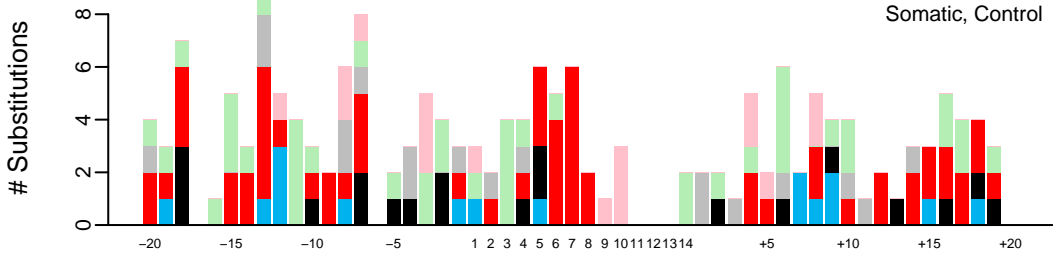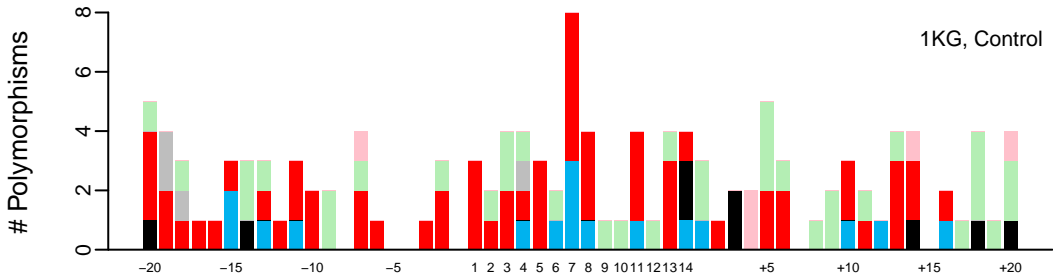

MOTIF POSITION

### SRF, PB0078.1

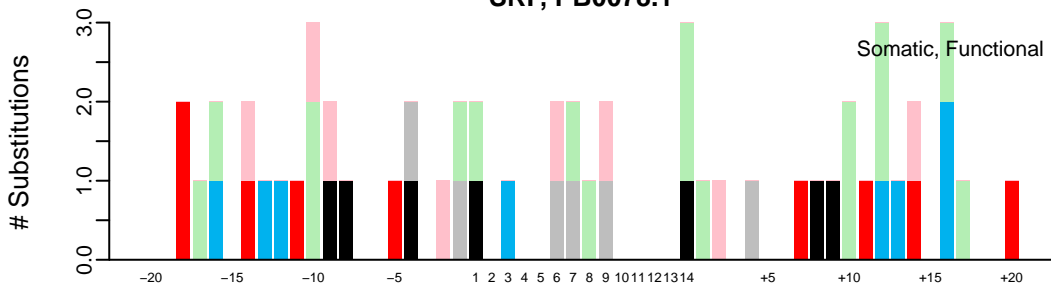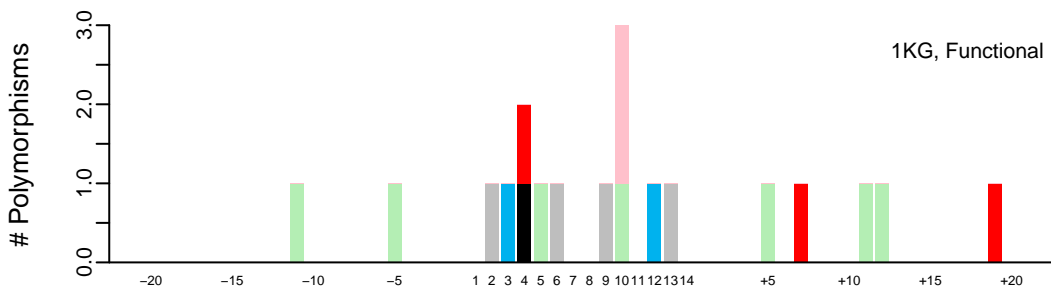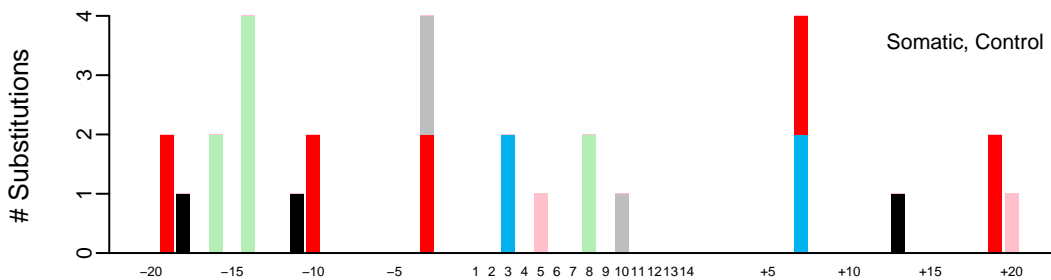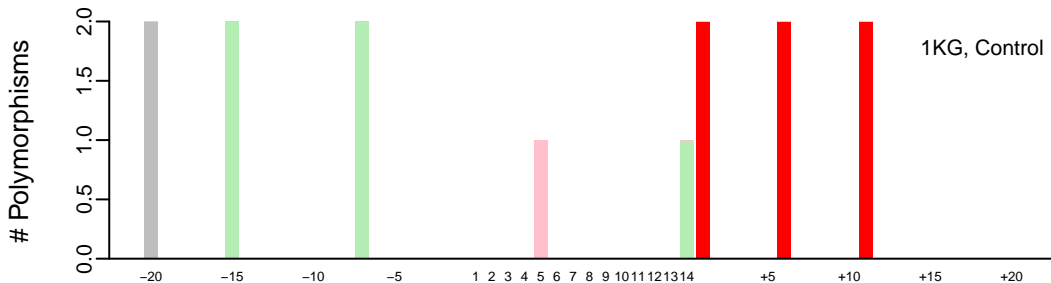

MOTIF POSITION

# BHLHE40, PB0111.1

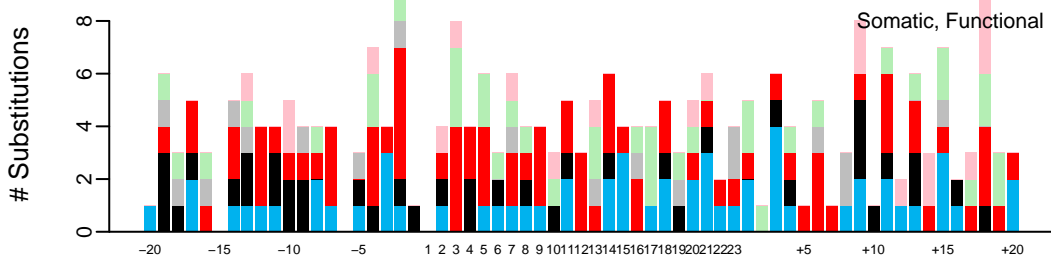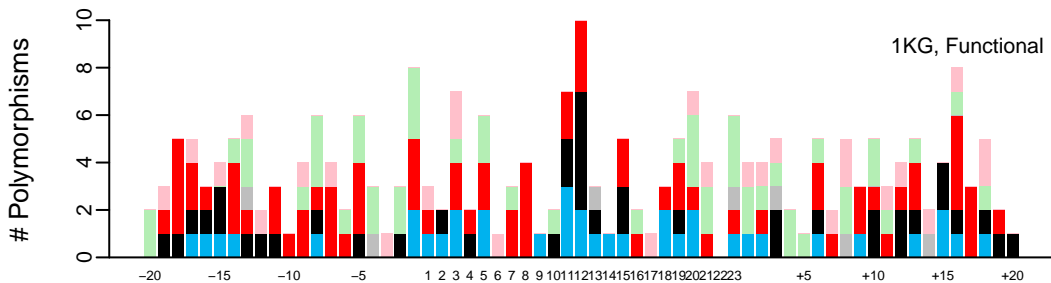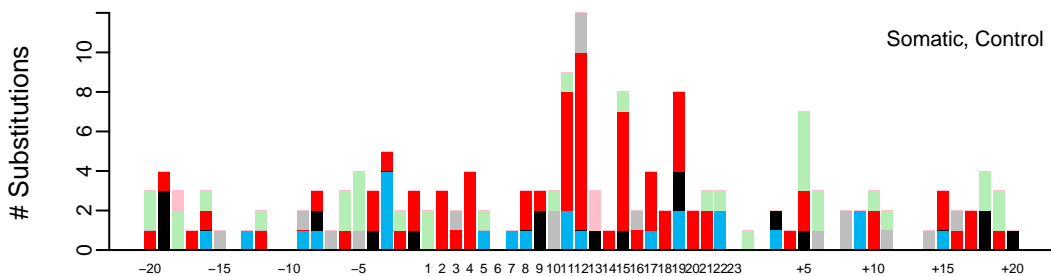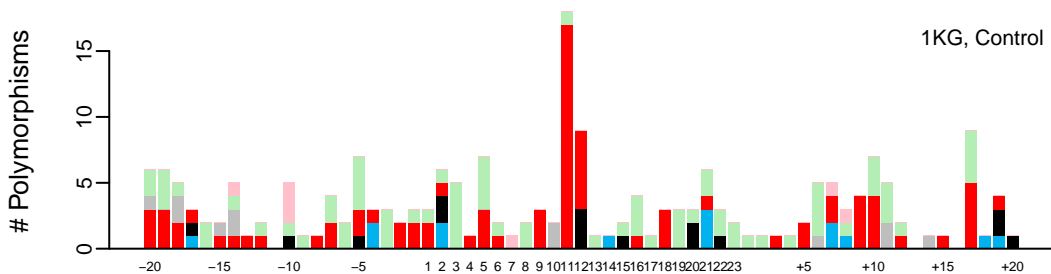

### EGR1, PB0114.1

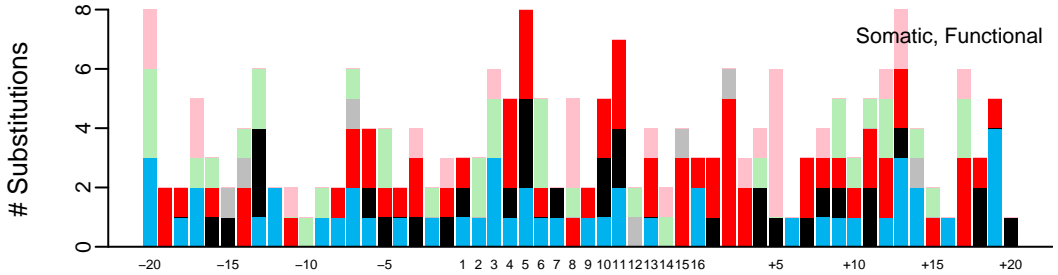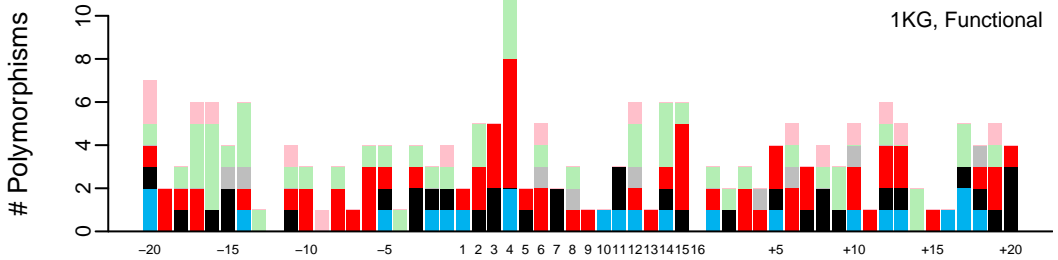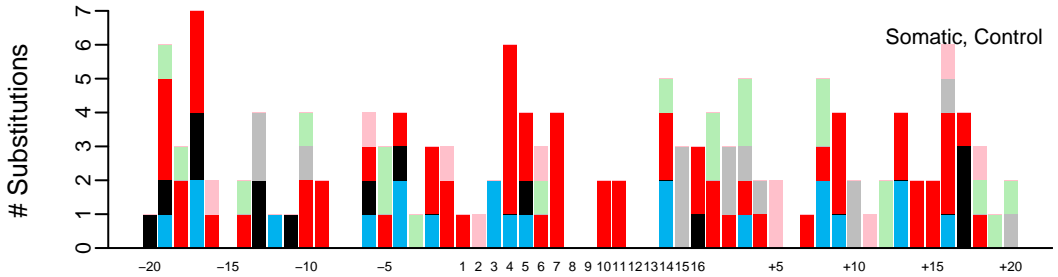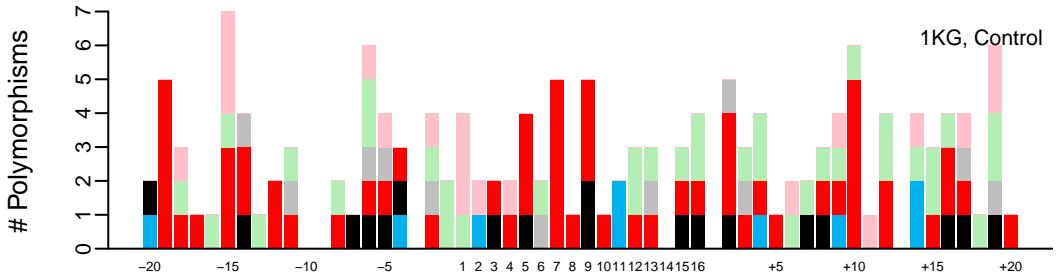

MOTIF POSITION

### FOXA2, PB0119.1

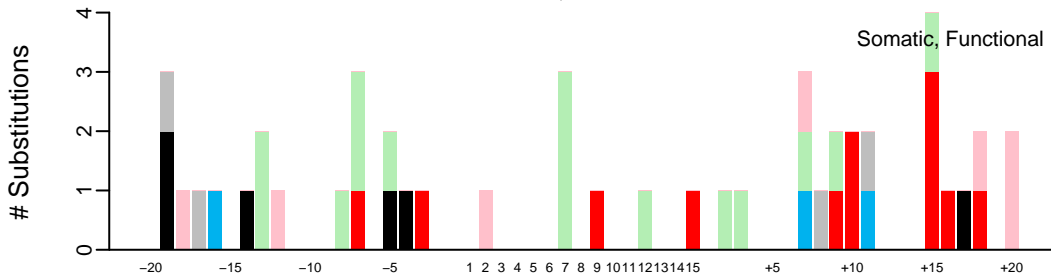

Somatic, Functional

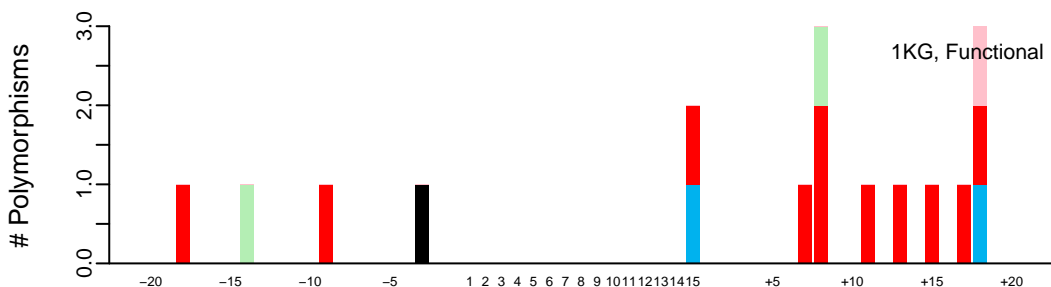

1KG, Functional

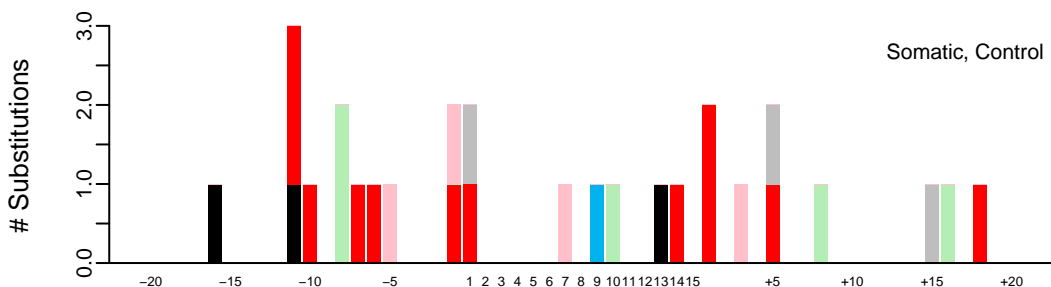

Somatic, Control

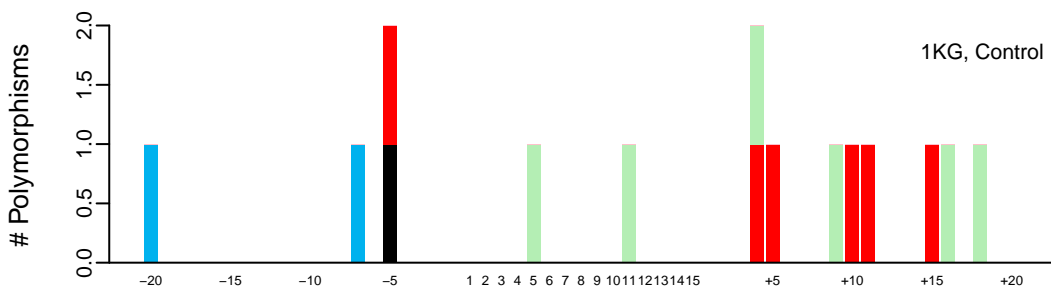

1KG, Control

MOTIF POSITION



# GABP, PB0124.1

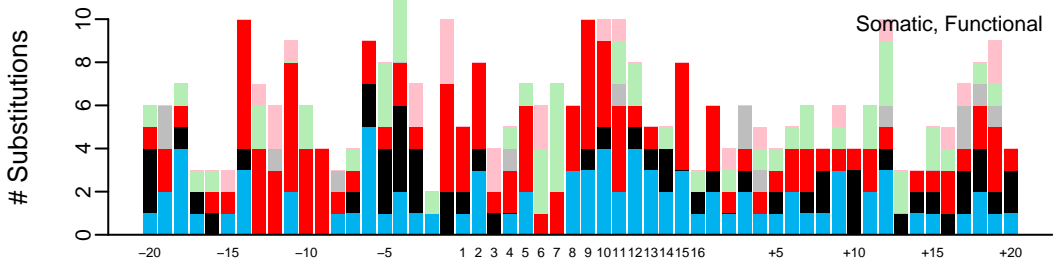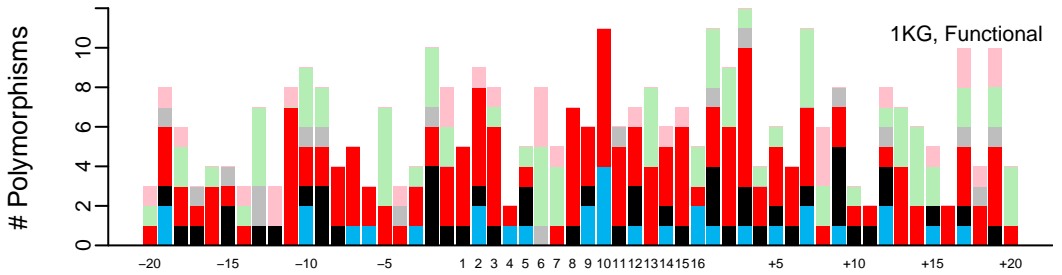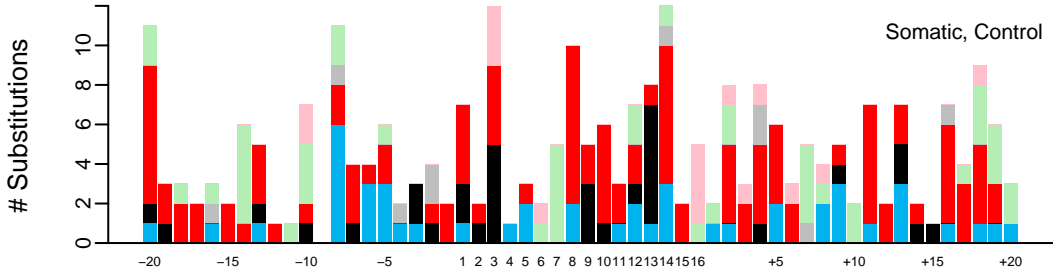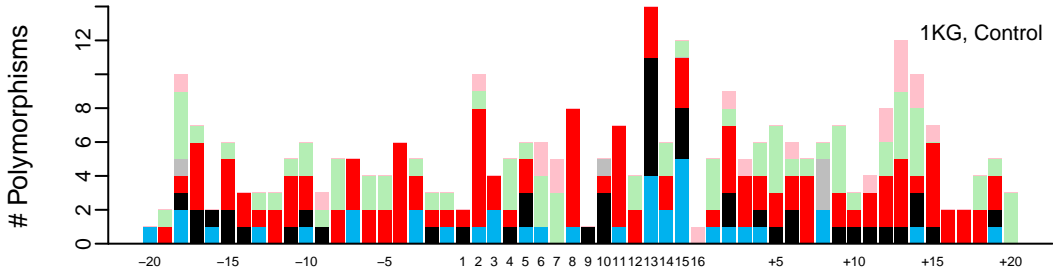

MOTIF POSITION

# HNF4A, PB0134.1

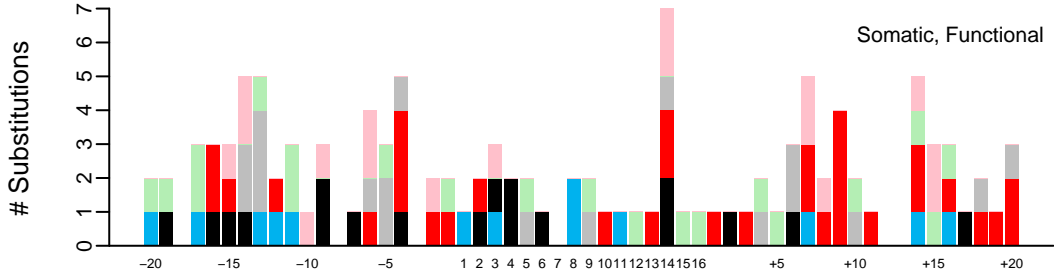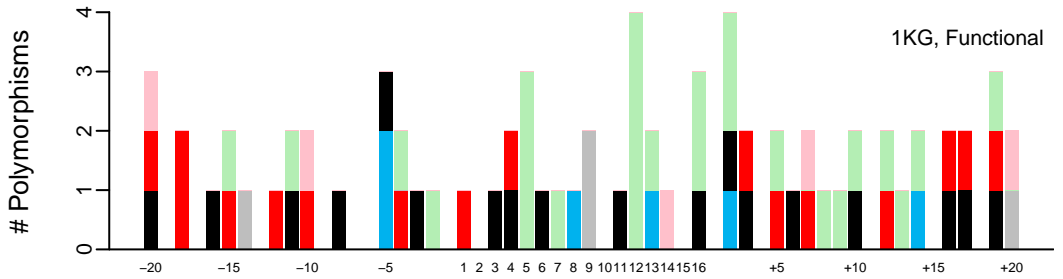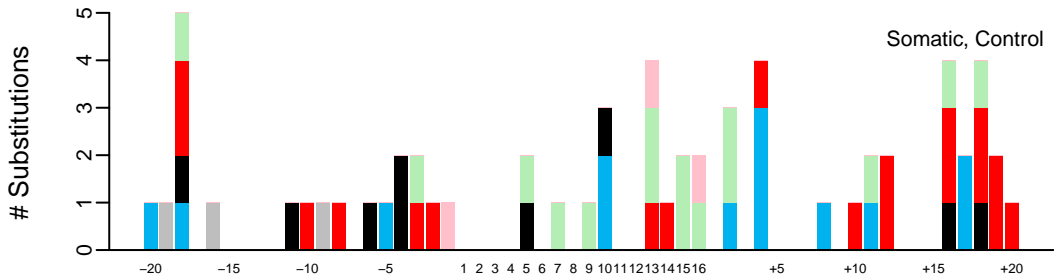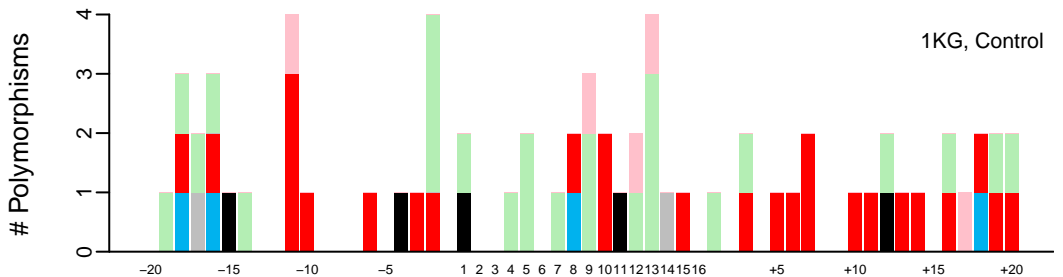

MOTIF POSITION

# IRF4, PB0138.1

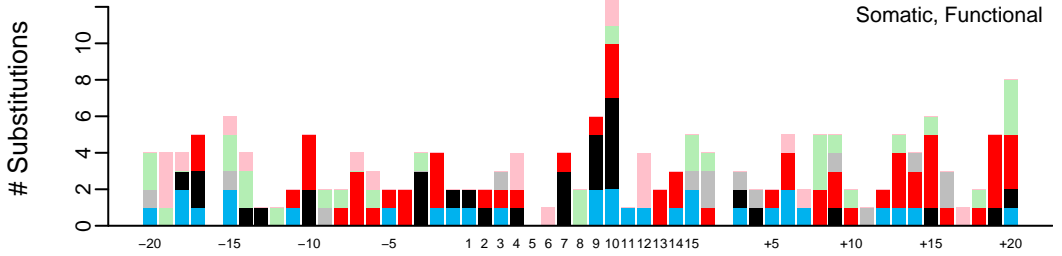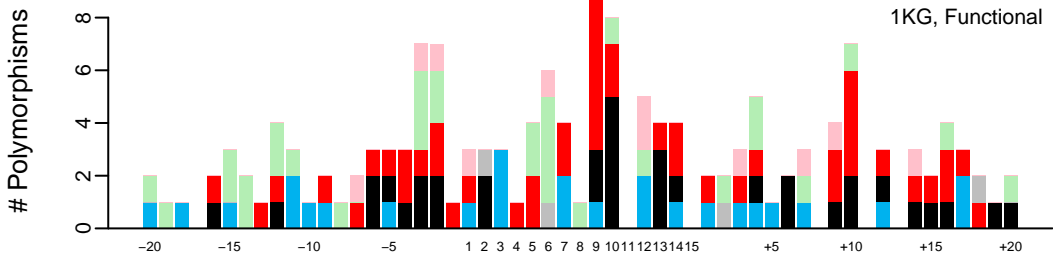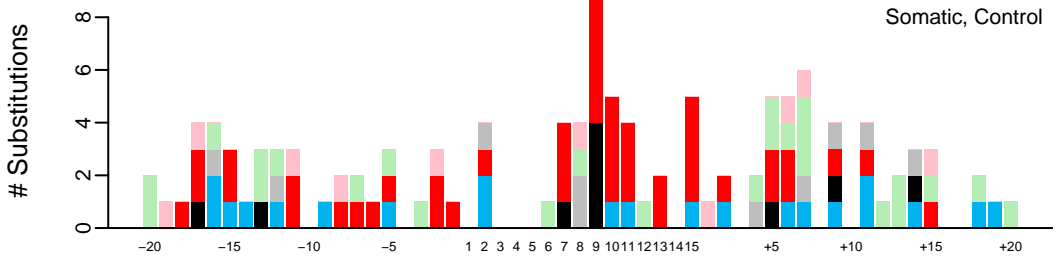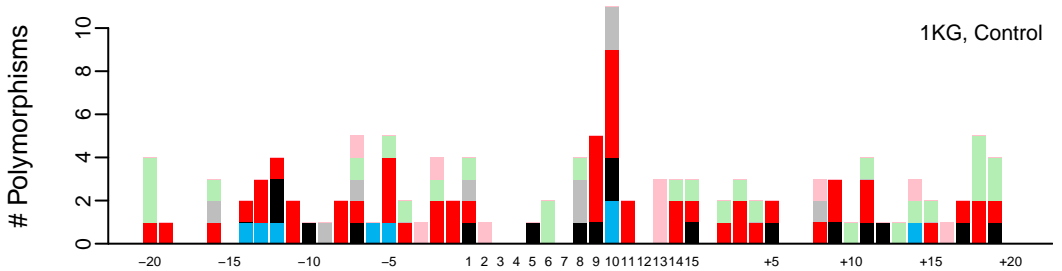

MOTIF POSITION

# MAX, PB0147.1

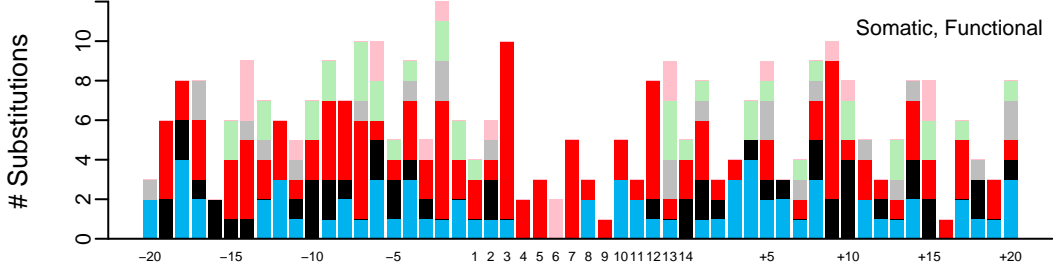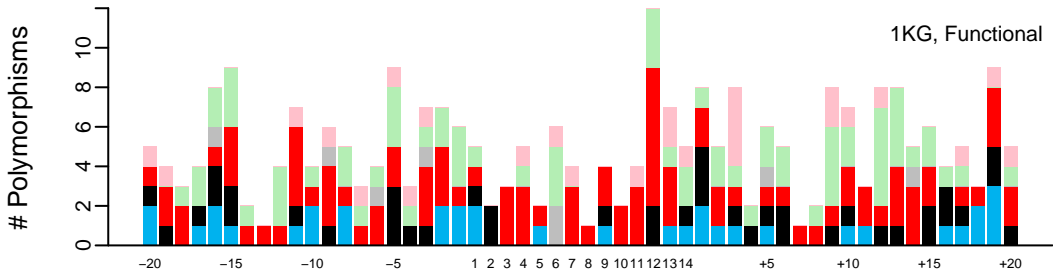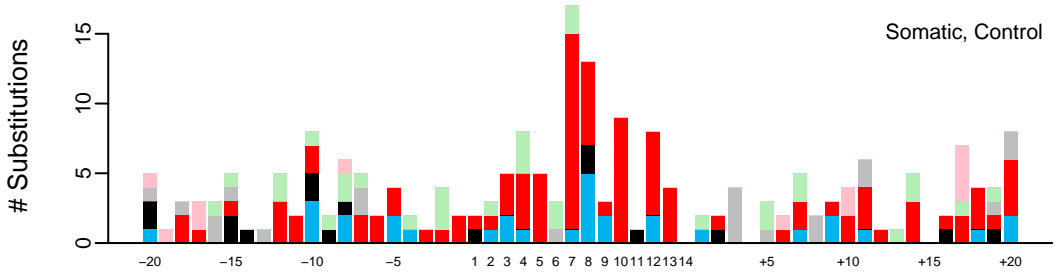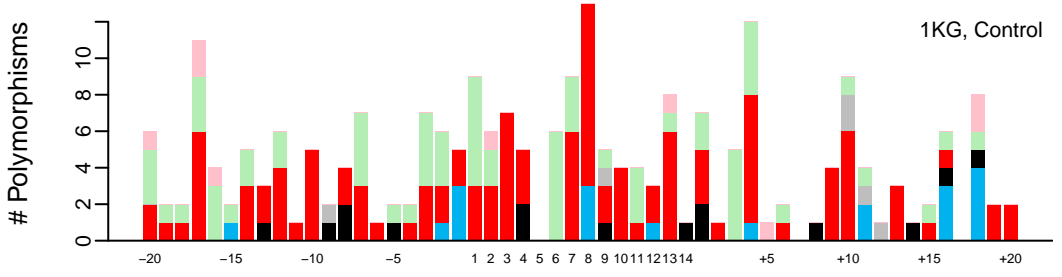

MOTIF POSITION

### PU1, PB0162.1

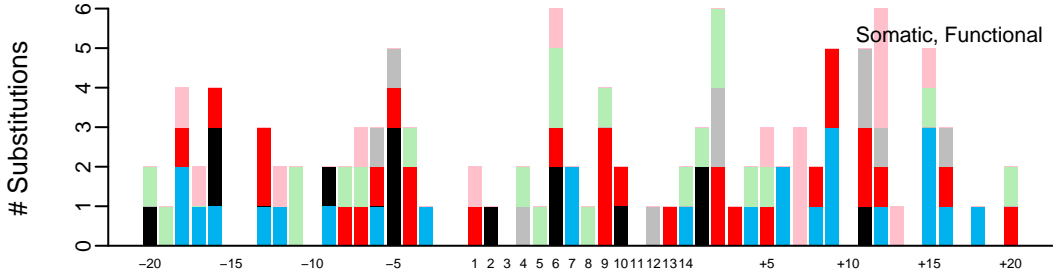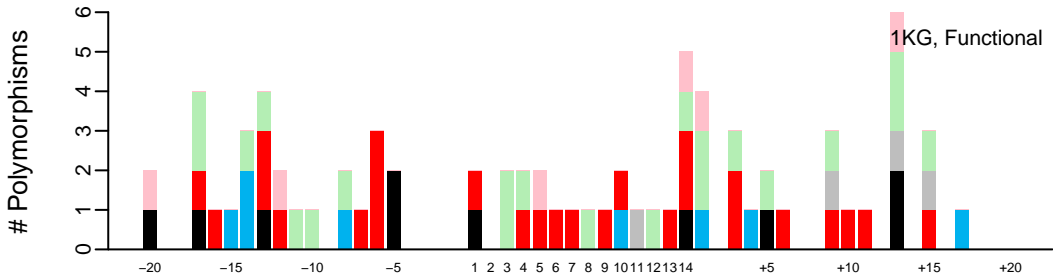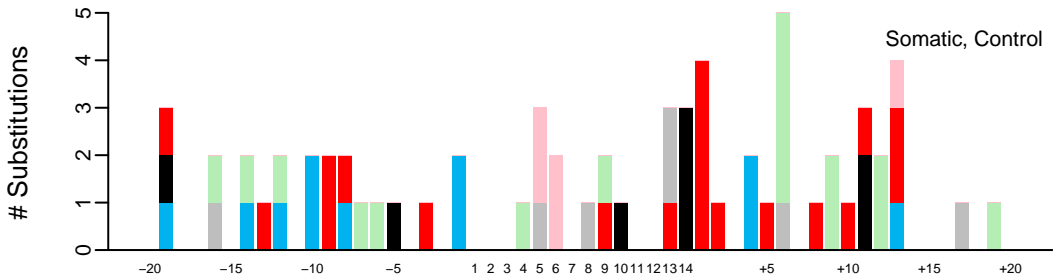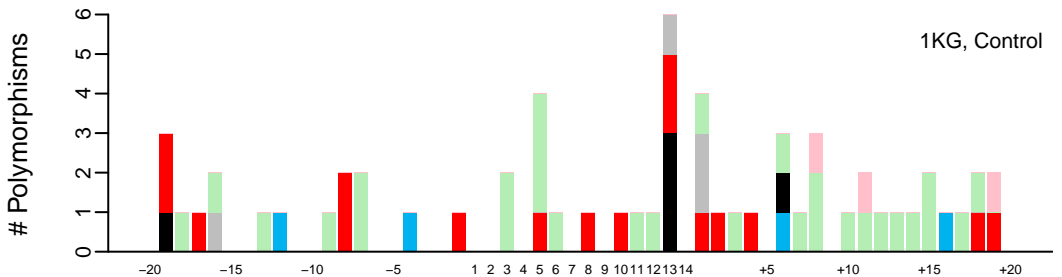

MOTIF POSITION

### SRF, PB0182.1

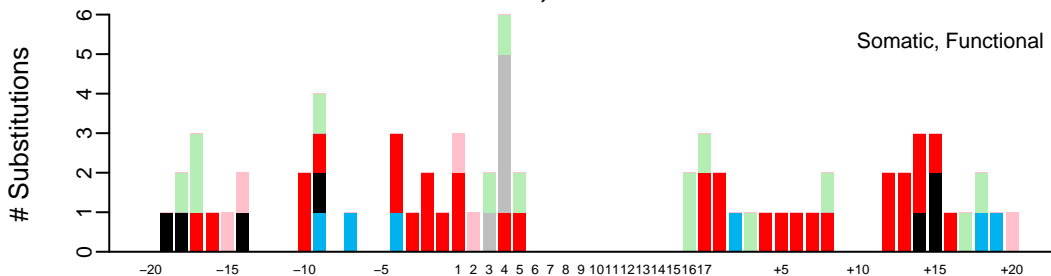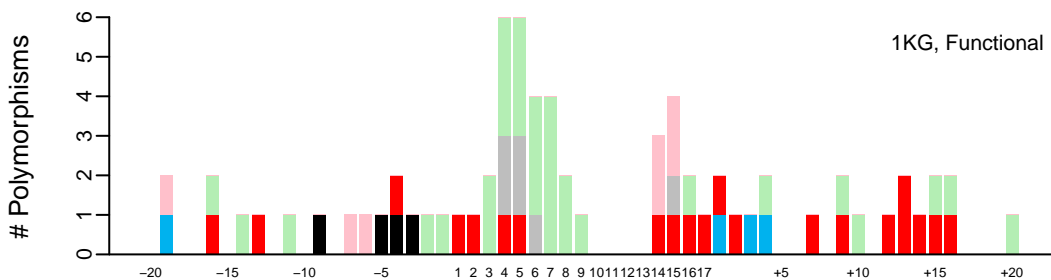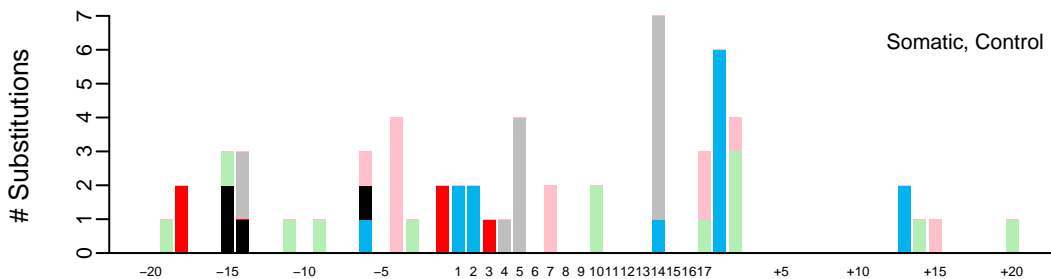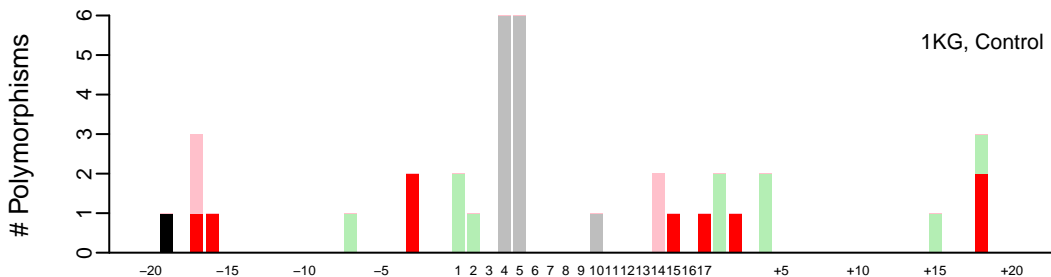

MOTIF POSITION
