# Supplementary material for: Mutational Biases Drive Elevated Rates of Substitution at Regulatory Sites across Cancer Types
Source: PLoS Genet. 2016 Aug 4;12(8):e1006207. doi: 10.1371/journal.pgen.1006207 (PMC4973979; doi:10.1371/journal.pgen.1006207)
Supplement: S4 Dataset — (XLSX) [file pgen.1006207.s022.xlsx]

## Sheet: Logistic_Model
S4 Dataset: Logistic regression analysis of the outcome variable "mutated/not mutated"
glm(formula = Mutation ~ RepliTime + Matrix + Func + In_Anchor, family = "binomial", data = Mut_time_2)
Deviance Residuals:
Min	1Q	Median	3Q	Max
-0.4599	-0.2712	-0.2309	-0.1926	3.3068
Estimate	Std.Error	z	value	Pr(>|z|)
Intercept	-3.55321	0.125909	-28.22	<2e-16	***
RepliTime	0.504748	0.044292	11.396	<2e-16	***
MatrixMA0005.2	0.26358	0.319868	0.824	0.409923
MatrixMA0007.2	0.057042	0.238407	0.239	0.810902
MatrixMA0014.2	0.315462	0.141539	2.229	0.025827	*
MatrixMA0024.2	0.124442	0.136568	0.911	0.362185
MatrixMA0035.3	0.080338	0.345128	0.233	0.815935
MatrixMA0036.2	-0.5286	0.520009	-1.017	0.309382
MatrixMA0037.2	0.431463	0.363842	1.186	0.23568
MatrixMA0047.2	-0.651152	0.377643	-1.724	0.084662	.
MatrixMA0050.2	0.654552	0.2161	3.029	0.002454	**
MatrixMA0052.2	-0.024651	0.403791	-0.061	0.95132
MatrixMA0058.2	-0.66368	0.328426	-2.021	0.043301	*
MatrixMA0060.2	0.055093	0.140493	0.392	0.694953
MatrixMA0062.2	-0.263238	0.139173	-1.891	0.058564	.
MatrixMA0076.2	-0.488568	0.142531	-3.428	0.000608	***
MatrixMA0079.3	-0.614608	0.135994	-4.519	6.2e-06	***
MatrixMA0080.3	-0.084595	0.181295	-0.467	0.640775
MatrixMA0083.2	0.299073	0.221615	1.35	0.177173
MatrixMA0093.2	-1.16016	0.20492	-5.662	1.5e-08	***
MatrixMA0095.2	-0.049703	0.161365	-0.308	0.75807
MatrixMA0098.2	-0.192173	0.166242	-1.156	0.247688
MatrixMA0102.3	-0.746719	0.429907	-1.737	0.082399	.
MatrixMA0103.2	-0.428776	0.244599	-1.753	0.079606	.
MatrixMA0105.3	-0.266542	0.19175	-1.39	0.164514
MatrixMA0106.2	0.043602	0.187897	0.232	0.816499
MatrixMA0114.2	0.147163	0.189149	0.778	0.436553
MatrixMA0137.3	-0.489235	0.230666	-2.121	0.033925	*
MatrixMA0138.2	0.450025	0.154557	2.912	0.003595	**
MatrixMA0139.1	0.760737	0.127398	5.971	2.35e-09	***
MatrixMA0140.2	0.556756	0.211681	2.63	0.008534	**
MatrixMA0144.2	-0.942316	0.287987	-3.272	0.001068	**
MatrixMA0147.2	-1.10714	0.305225	-3.627	0.000286	***
MatrixMA0148.3	0.338577	0.251045	1.349	0.177444
MatrixMA0154.2	-0.380786	0.209297	-1.819	0.068856	.
MatrixMA0162.2	-0.07828	0.135356	-0.578	0.563045
MatrixMA0239.1	-0.318806	0.297625	-1.071	0.284095
MatrixMA0258.2	0.22376	0.174033	1.286	0.198536
MatrixMA0281.1	-1.41727	0.236045	-6.004	1.92e-09	***
MatrixMA0303.1	0.038187	0.170871	0.223	0.823156
MatrixMA0318.1	0.117238	0.331346	0.354	0.72347
MatrixMA0328.1	0.362188	0.406493	0.891	0.372926
MatrixMA0331.1	0.23567	0.184437	1.278	0.201326
MatrixMA0337.1	-0.108263	0.157919	-0.686	0.492991
MatrixMA0383.1	0.674681	0.385811	1.749	0.080337	.
MatrixMA0409.1	-1.03351	0.236368	-4.372	1.23e-05	***
MatrixMA0423.1	0.038018	0.185879	0.205	0.837937
MatrixMA0446.1	-0.583984	0.401185	-1.456	0.14549
MatrixMA0462.1	-0.405727	0.263061	-1.542	0.122993
MatrixMA0464.1	-0.480106	0.205554	-2.336	0.019509	*
MatrixMA0465.1	0.213914	0.345806	0.619	0.536182
MatrixMA0466.1	-0.543624	0.401344	-1.355	0.175574
MatrixMA0468.1	0.258614	0.332008	0.779	0.436016
MatrixMA0470.1	-0.074436	0.134698	-0.553	0.580527
MatrixMA0471.1	-0.626627	0.155748	-4.023	5.74e-05	***
MatrixMA0473.1	-0.179418	0.147752	-1.214	0.224626
MatrixMA0475.1	-0.884819	0.166641	-5.31	1.1e-07	***
MatrixMA0476.1	-1.16358	0.28026	-4.152	3.3e-05	***
MatrixMA0477.1	-1.16568	0.267444	-4.359	1.31e-05	***
MatrixMA0478.1	-1.05968	0.267572	-3.96	7.48e-05	***
MatrixMA0479.1	-0.492962	0.378056	-1.304	0.192254
MatrixMA0481.1	-0.673351	0.519361	-1.296	0.194804
MatrixMA0484.1	-0.012488	0.203079	-0.061	0.950968
MatrixMA0486.1	0.144126	0.189112	0.762	0.445989
MatrixMA0488.1	0.116889	0.189032	0.618	0.53634
MatrixMA0489.1	-0.194416	0.202687	-0.959	0.337461
MatrixMA0490.1	-0.894084	0.252319	-3.543	0.000395	***
MatrixMA0491.1	-1.80235	0.356298	-5.059	4.22e-07	***
MatrixMA0492.1	0.353108	0.173623	2.034	0.041975	*
MatrixMA0495.1	-0.019268	0.264191	-0.073	0.94186
MatrixMA0496.1	0.045797	0.264421	0.173	0.862496
MatrixMA0497.1	-0.002188	0.403901	-0.005	0.995679
MatrixMA0501.1	-0.108725	0.225605	-0.482	0.62986
MatrixMA0502.1	0.014126	0.140738	0.1	0.92005
MatrixMA0504.1	0.133193	0.155095	0.859	0.390459
MatrixMA0506.1	-0.305796	0.131866	-2.319	0.020396	*
MatrixMA0507.1	-0.155378	0.343851	-0.452	0.651359
MatrixMA0508.1	0.160929	0.223697	0.719	0.471889
MatrixMA0510.1	0.125001	0.157863	0.792	0.42846
MatrixMA0511.1	-0.194249	0.206039	-0.943	0.345794
MatrixMA0513.1	0.060762	0.184132	0.33	0.741406
MatrixMA0516.1	-0.189308	0.130682	-1.449	0.147445
MatrixMA0517.1	0.153722	0.226336	0.679	0.497027
MatrixMA0521.1	-0.365824	0.211276	-1.732	0.083362	.
MatrixMA0523.1	-0.454654	0.329034	-1.382	0.167038
MatrixMA0524.1	0.028648	0.169285	0.169	0.865616
MatrixMA0525.1	0.360456	0.171921	2.097	0.036026	*
MatrixMA0526.1	-0.97728	0.216885	-4.506	6.61e-06	***
MatrixMA0527.1	0.297001	0.138949	2.137	0.032559	*
MatrixMA0528.1	0.224907	0.154534	1.455	0.145563
MatrixMA0531.1	0.421064	0.131593	3.2	0.001375	**
MatrixMA0541.1	0.582549	0.145367	4.007	6.14e-05	***
MatrixMA0546.1	-0.042369	0.33053	-0.128	0.898003
MatrixMA0555.1	0.150981	0.345426	0.437	0.662049
MatrixMA0559.1	-0.244098	0.402569	-0.606	0.544282
MatrixMA0568.1	-1.06044	0.236342	-4.487	7.23e-06	***
MatrixMA0569.1	-1.62687	0.340565	-4.777	1.78e-06	***
MatrixMA0585.1	0.181304	0.264836	0.685	0.493603
MatrixMA0595.1	-0.484173	0.195144	-2.481	0.013097	*
MatrixMA0596.1	-1.23832	0.399537	-3.099	0.001939	**
MatrixMA0597.1	-0.378977	0.181757	-2.085	0.037063	*
MatrixPB0007.1	0.043206	0.162499	0.266	0.790329
MatrixPB0010.1	0.276886	0.132882	2.084	0.037187	*
MatrixPB0015.1	-0.036701	0.432968	-0.085	0.932448
MatrixPB0020.1	0.253631	0.139192	1.822	0.068428	.
MatrixPB0030.1	0.388717	0.16028	2.425	0.015298	*
MatrixPB0034.1	0.576759	0.215754	2.673	0.007513	**
MatrixPB0043.1	0.019579	0.156431	0.125	0.900396
MatrixPB0058.1	-0.16151	0.175361	-0.921	0.357043
MatrixPB0078.1	-0.284539	0.317488	-0.896	0.370135
MatrixPB0111.1	0.671725	0.150166	4.473	7.71e-06	***
MatrixPB0114.1	0.197597	0.165412	1.195	0.232251
MatrixPB0119.1	0.070995	0.331203	0.214	0.83027
MatrixPB0124.1	0.159767	0.148116	1.079	0.280738
MatrixPB0134.1	0.271592	0.199228	1.363	0.172811
MatrixPB0138.1	0.384779	0.167898	2.292	0.02192	*
MatrixPB0147.1	-0.007958	0.157191	-0.051	0.959622
MatrixPB0162.1	0.126293	0.208512	0.606	0.544724
MatrixPB0182.1	0.607657	0.231015	2.63	0.008529	**
FuncN	-0.364073	0.019942	-18.257	<2e-16	***
In_Anchor1	0.157378	0.024636	6.388	1.68e-10	***
---
Signif. codes: 0 ‘***’ 0.001 ‘**’ 0.01 ‘*’ 0.05 ‘.’ 0.1 ‘ ’ 1
(Dispersion parameter for binomial family taken to be 1)
Null deviance: 99862 on 373786 degrees of freedom
Residual deviance: 97112 on 373666 degrees of freedom
(17131 observations deleted due to missingness)
AIC: 97354
Number of Fisher Scoring iterations: 7

## Sheet: Wald_Tests
Wald Test for significance of individual factor of the logit regression model.
Term	Chi2	df	p
Replication_Time	129.866	1	<1.00E-04
Matrix	1931.57	117	<1.00E-03
Functionality	333.307	1	<1.00E-04
Loop_Anchor	40.8066	1	<1.00E-9

## Sheet: Predicted_mean_Replitime
Predicted proportion of mutated TF binding sites inside and outside anchor points,
holding replication timing at its mean and considering functional sites only.
RepliTime	Func	Matrix	TF	Outside_Anchor	Inside_Anchor
0.42281	F	MA0139.1	CTCF	0.0704985	0.0815344
0.42281	F	MA0383.1	MEF2A	0.0650635	0.0753176
0.42281	F	PB0111.1	BHLHE40	0.064884	0.075112
0.42281	F	MA0050.2	IRF1	0.0638498	0.0739277
0.42281	F	PB0182.1	Srf	0.0611034	0.0707806
0.42281	F	MA0541.1	E2F4	0.0596787	0.0691469
0.42281	F	PB0034.1	IRF4	0.0593546	0.0687751
0.42281	F	MA0140.2	TAL1::GATA1	0.0582476	0.067505
0.42281	F	MA0138.2	Nrsf	0.0526616	0.0610888
0.42281	F	MA0037.2	GATA3	0.0517432	0.0600328
0.42281	F	MA0531.1	CTCFL	0.0512354	0.0594487
0.42281	F	PB0030.1	HNF4A	0.0496856	0.0576656
0.42281	F	PB0138.1	IRF4	0.0495	0.0574519
0.42281	F	MA0328.1	Pbx3	0.0484478	0.0562408
0.42281	F	MA0525.1	TP63	0.048368	0.0561489
0.42281	F	MA0492.1	Jund	0.0480309	0.0557608
0.42281	F	MA0148.3	FOXA1	0.0473709	0.0550006
0.42281	F	MA0014.2	Pax5	0.0463386	0.0538115
0.42281	F	MA0083.2	Srf	0.0456197	0.0529831
0.42281	F	MA0527.1	ZBTB33	0.0455296	0.0528792
0.42281	F	PB0010.1	Egr1	0.0446634	0.0518808
0.42281	F	PB0134.1	HNF4A	0.0444381	0.051621
0.42281	F	MA0005.2	MEF2A	0.0440991	0.0512302
0.42281	F	MA0468.1	DUX4	0.0438902	0.0509893
0.42281	F	PB0020.1	Gabp	0.0436816	0.0507488
0.42281	F	MA0331.1	Srf	0.0429374	0.0498905
0.42281	F	MA0528.1	Znf263	0.0424973	0.0493828
0.42281	F	MA0258.2	ESR2	0.0424507	0.049329
0.42281	F	MA0465.1	CDX2	0.0420522	0.0488693
0.42281	F	PB0114.1	Egr1	0.0413998	0.0481164
0.42281	F	MA0585.1	MEF2A	0.040758	0.0473756
0.42281	F	MA0508.1	PRDM1	0.0399688	0.0464645
0.42281	F	PB0124.1	Gabp	0.0399242	0.046413
0.42281	F	MA0517.1	STAT2::STAT1	0.0396932	0.0461462
0.42281	F	MA0555.1	MEF2C	0.0395888	0.0460257
0.42281	F	MA0114.2	HNF4A	0.0394439	0.0458584
0.42281	F	MA0486.1	HSF1	0.039329	0.0457257
0.42281	F	MA0504.1	Tr4	0.038918	0.045251
0.42281	F	PB0162.1	PU1	0.0386607	0.0449538
0.42281	F	MA0510.1	RFX5	0.0386128	0.0448984
0.42281	F	MA0024.2	E2F1	0.038592	0.0448744
0.42281	F	MA0318.1	Pbx3	0.0383256	0.0445667
0.42281	F	MA0488.1	Cjun	0.0383128	0.0445518
0.42281	F	MA0035.3	Gata1	0.0369885	0.0430215
0.42281	F	PB0119.1	FOXA2	0.0366572	0.0426386
0.42281	F	MA0513.1	SMAD2::SMAD3::SMAD4	0.0362975	0.0422228
0.42281	F	MA0007.2	AR	0.0361676	0.0420726
0.42281	F	MA0060.2	NFYA	0.0360998	0.0419941
0.42281	F	MA0496.1	MAFK	0.0357777	0.0416217
0.42281	F	MA0106.2	TP53	0.035702	0.0415342
0.42281	F	PB0007.1	BHLHE40	0.0356884	0.0415185
0.42281	F	MA0303.1	Cjun	0.0355161	0.0413192
0.42281	F	MA0423.1	Egr1	0.0355103	0.0413125
0.42281	F	MA0524.1	TFAP2C	0.0351908	0.040943
0.42281	F	PB0043.1	Max	0.0348841	0.0405884
0.42281	F	MA0502.1	NFYB	0.034701	0.0403766
0.42281	F	MA0003.2	TFAP2A	0.0342309	0.0398328
0.42281	F	MA0497.1	MEF2C	0.0341587	0.0397492
0.42281	F	PB0147.1	Max	0.0339688	0.0395295
0.42281	F	MA0484.1	HNF4G	0.0338205	0.0393579
0.42281	F	MA0495.1	MAFF	0.0335996	0.0391024
0.42281	F	MA0052.2	MEF2A	0.0334253	0.0389006
0.42281	F	PB0015.1	FOXA2	0.0330382	0.0384526
0.42281	F	MA0546.1	FOXA1	0.0328576	0.0382436
0.42281	F	MA0095.2	Yy1	0.0326253	0.0379747
0.42281	F	MA0470.1	E2F4	0.0318536	0.0370814
0.42281	F	MA0162.2	Egr1	0.0317353	0.0369444
0.42281	F	MA0080.3	PU1	0.0315418	0.0367204
0.42281	F	MA0337.1	Egr1	0.0308268	0.0358923
0.42281	F	MA0501.1	NFE2::MAF	0.030813	0.0358763
0.42281	F	MA0507.1	POU2F2	0.0294499	0.0342971
0.42281	F	PB0058.1	PU1	0.0292751	0.0340946
0.42281	F	MA0473.1	ELF1	0.0287705	0.0335097
0.42281	F	MA0516.1	SP2	0.0284954	0.0331909
0.42281	F	MA0098.2	ETS1	0.0284162	0.0330991
0.42281	F	MA0511.1	RUNX2	0.0283589	0.0330327
0.42281	F	MA0489.1	Cjun	0.0283543	0.0330274
0.42281	F	MA0559.1	MEF2C	0.0270172	0.031477
0.42281	F	MA0062.2	Gabp	0.0265186	0.0308987
0.42281	F	MA0105.3	NFKB	0.0264334	0.0307999
0.42281	F	PB0078.1	Srf	0.0259742	0.0302672
0.42281	F	MA0506.1	Nrf1	0.0254418	0.0296495
0.42281	F	MA0239.1	Pax5	0.0251212	0.0292775
0.42281	F	MA0521.1	Tcf12	0.0239951	0.0279703
0.42281	F	MA0597.1	THAP1	0.023689	0.027615
0.42281	F	MA0154.2	EBF1	0.0236471	0.0275664
0.42281	F	MA0462.1	BATF::JUN	0.0230781	0.0269057
0.42281	F	MA0103.2	ZEB1	0.0225641	0.0263087
0.42281	F	MA0523.1	TCF7L2	0.0220004	0.0256539
0.42281	F	MA0464.1	BHLHE40	0.0214594	0.0250253
0.42281	F	MA0595.1	SRebp1	0.0213741	0.0249263
0.42281	F	MA0076.2	ELK4	0.0212824	0.0248197
0.42281	F	MA0137.3	STAT1	0.0212685	0.0248036
0.42281	F	MA0479.1	FOXH1	0.0211911	0.0247135
0.42281	F	MA0036.2	Gata2	0.0204643	0.023869
0.42281	F	MA0466.1	CEBPB	0.0201653	0.0235214
0.42281	F	MA0446.1	FOXA2	0.0193831	0.022612
0.42281	F	MA0079.3	SP1	0.0188095	0.021945
0.42281	F	MA0471.1	E2F6	0.018589	0.0216885
0.42281	F	MA0047.2	FOXA2	0.0181468	0.0211742
0.42281	F	MA0058.2	Max	0.0179249	0.0209161
0.42281	F	MA0481.1	FOXP1	0.0177555	0.020719
0.42281	F	MA0102.3	CEBPA	0.0165202	0.0192816
0.42281	F	MA0475.1	FLI1	0.01442	0.0168363
0.42281	F	MA0490.1	Junb	0.0142889	0.0166837
0.42281	F	MA0144.2	STAT3	0.0136253	0.0159106
0.42281	F	MA0526.1	USF2	0.0131633	0.0153723
0.42281	F	MA0409.1	SRebp1	0.0124525	0.014544
0.42281	F	MA0478.1	FOSL2	0.0121347	0.0141736
0.42281	F	MA0568.1	Max	0.0121256	0.014163
0.42281	F	MA0147.2	Cmyc	0.0115788	0.0135255
0.42281	F	MA0093.2	USF1	0.0109875	0.0128361
0.42281	F	MA0476.1	Cfos	0.0109503	0.0127928
0.42281	F	MA0477.1	FOSL1	0.0109276	0.0127663
0.42281	F	MA0596.1	SRebp2	0.0101697	0.0118825
0.42281	F	MA0281.1	USF1	0.0085176	0.00995487
0.42281	F	MA0569.1	Max	0.00691815	0.00808773
0.42281	F	MA0491.1	Jund	0.00581118	0.0067949
